# Supplementary material for: Switchable construction of oxa-heterocycles with diverse ring sizes via chemoselective cyclization controlled by dibrominated compounds
Source: Royal Society of Chemistry journal article supplement (doi:10.1039/d2qo01273a), 2022-01-01

# Supporting Information

## Switchable construction of oxa-heterocycles with divergent ring sizes via dibrominated compounds- controlled chemoselective cyclization

Fangzhi Hu,<sup>a,†</sup> Liang Wang,<sup>a,†</sup> Peng Wang,<sup>a</sup> Zhanshuai Ding,<sup>a</sup> Yuzhuo Chen,<sup>a</sup> Lubin Xu,<sup>a</sup>  
Xiong-Li Liu,<sup>b</sup> Shuai-Shuai Li<sup>\*,a</sup>

<sup>a</sup> College of Chemistry and Pharmaceutical Sciences, Qingdao Agricultural University, Changcheng Rd. #700, Qingdao 266109, P. R. China.

<sup>b</sup> National & Local Joint Engineering Research Center for the Exploitation of Homology Resources of Southwest Medicine and Food, Guizhou University, Guiyang, Guizhou 550025, P. R. China.

† F. Hu and L. Wang contributed equally.

**Corresponding Author**

\*E-mail: [flyshuaishuai@126.com](mailto:flyshuaishuai@126.com).

### Table of Contents

|                                                             |            |
|-------------------------------------------------------------|------------|
| <b>1. General Information.....</b>                          | <b>S2</b>  |
| <b>2. General Procedure.....</b>                            | <b>S2</b>  |
| <b>3. Control Experiments.....</b>                          | <b>S4</b>  |
| <b>4. Characterization of Products.....</b>                 | <b>S5</b>  |
| <b>5. Crystal Structure and Data .....</b>                  | <b>S21</b> |
| <b>6. <sup>1</sup>H and <sup>13</sup>C NMR Spectra.....</b> | <b>S24</b> |

## 1. General Information

Unless otherwise noted, all reagents and solvents were purchased from the commercial sources and used as received. Thin layer chromatography (TLC) was used to monitor the reaction on Merck 60 F254 precoated silica gel plate (0.2 mm thickness). TLC spots were visualized by UV-light irradiation on Spectroline Model ENF-24061/F 254 nm. The products were purified by flash column chromatography (200-300 mesh silica gel) eluted with the gradient of petroleum ether and ethyl acetate. Proton nuclear magnetic resonance spectra ( $^1\text{H}$  NMR) were recorded on a Bruker 500 MHz NMR spectrometer ( $\text{CDCl}_3$  or  $\text{DMSO-d}_6$  solvent). The chemical shifts were reported in parts per million (ppm), downfield from  $\text{SiMe}_4$  ( $\delta$  0.0) and relative to the signal of chloroform-d ( $\delta$  7.26, singlet) or dimethyl sulfoxide- $d_6$  ( $\delta$  2.54, singlet). Multiplicities were afforded as: s (singlet); d (doublet); t (triplet); q (quartet); dd (doublets of doublet) or m (multiplets). The number of protons for a given resonance is indicated by nH. Coupling constants were reported as a  $J$  value in Hz. Carbon nuclear magnetic resonance spectra ( $^{13}\text{C}$  NMR) was referenced to the appropriate residual solvent peak. High resolution mass spectral analysis (HRMS) was performed on Waters XEVO G2 Q-TOF. All 3-(2-hydroxyphenyl)indolin-2-ones were prepared according to literature.<sup>1</sup>

## 2. General Procedure

### 2.1 General Procedure for Synthesis of Spirooxindole-fused Dibenzo[*b,f*]oxocines **3**

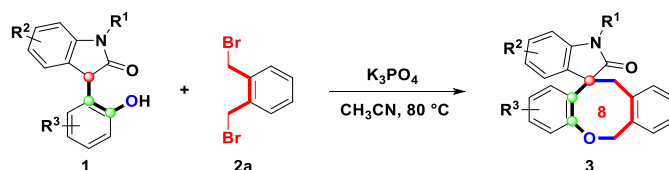

A sealed tube was charged with 3-(2-hydroxyphenyl)indolin-2-one **1** (0.1 mmol), 1,2-bis(bromomethyl)benzene **2a** (1.1 equiv.),  $\text{K}_3\text{PO}_4$  (3 equiv.), and  $\text{CH}_3\text{CN}$  (1 mL). The mixture was stirred at  $80\text{ }^\circ\text{C}$ . Upon completion of the reaction as indicated by TLC analysis, the mixture was concentrated in vacuum and the residue was directly purified by flash column chromatography on silica gel (eluent: ethyl acetate/petroleum ether, 1:20) to afford the desired spirooxindole-fused dibenzo[*b,f*]oxocines **3a-m**.

### 2.2 General Procedure for Synthesis of Indole Fused Nine-membered Oxa-heterocycles **4**

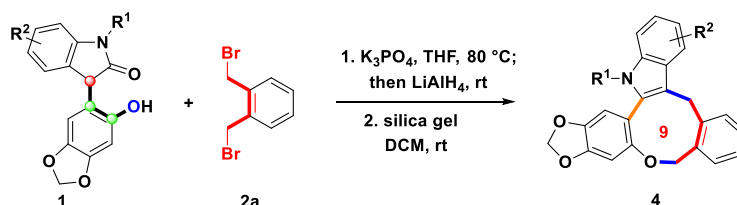

A sealed tube was charged with 3-(2-hydroxyphenyl)indolin-2-one **1** (0.3 mmol), 1,2-bis(bromomethyl)benzene **2a** (1.1 equiv.),  $\text{K}_3\text{PO}_4$  (3 equiv.), and  $\text{THF}$  (3 mL). The mixture was stirred at  $80\text{ }^\circ\text{C}$ . Upon completion of the reaction as indicated by TLC analysis,  $\text{LiAlH}_4$  (6 equiv.) was added to the mixture and stirred at room temperature. When product **3** was consumed up by TLC analysis,  $\text{H}_2\text{O}$  (5 mL) was added dropwise to the system at  $0\text{ }^\circ\text{C}$  and the resulting solution was extracted with

EtOAc (5 mL×3). The combined organic extracts were dried with anhydrous Na<sub>2</sub>SO<sub>4</sub> and concentrated in vacuo. The residue could be used in next step without needing to purify. Then silica gel (200 mg) was added in the residue, and the mixture was stirred in DCM (3 mL) at room temperature for 5 h. Upon completion of the reaction, the mixture was concentrated in vacuum and the residue was directly purified by flash column chromatography on silica gel (eluent: ethyl acetate/petroleum ether, 1:20) to afford the desired indole fused nine-membered oxa-heterocycles **4a-e**.

### 2.3 General Procedure for Synthesis of Spirooxindole-fused Chromans **6**

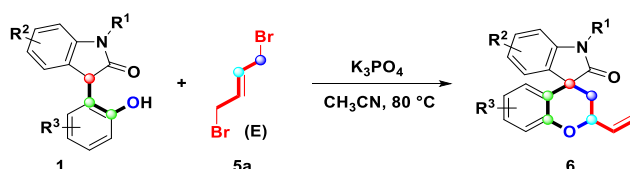

A sealed tube was charged with 3-(2-hydroxyphenyl)indolin-2-one **1** (0.1 mmol), (*E*)-1,4-dibromobut-2-ene **5a** (1.1 equiv.), K<sub>3</sub>PO<sub>4</sub> (3 equiv.), and CH<sub>3</sub>CN (1 mL). The mixture was stirred at 80 °C. Upon completion of the reaction as indicated by TLC analysis, the mixture was concentrated in vacuum and the residue was directly purified by flash column chromatography on silica gel (eluent: ethyl acetate/petroleum ether, 1:20) to afford the desired spirooxindole-fused chromans **6a-l**.

### 2.4 General Procedure for Synthesis of Allylated Oxindoles **7**

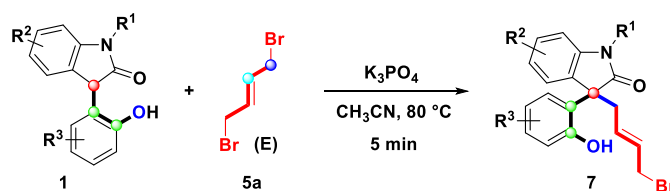

A sealed tube was charged with 3-(2-hydroxyphenyl)indolin-2-one **1** (0.1 mmol), (*E*)-1,4-dibromobut-2-ene **5a** (1.1 equiv.), K<sub>3</sub>PO<sub>4</sub> (3 equiv.), and CH<sub>3</sub>CN (1 mL). The mixture was stirred at 80 °C for 5 minute. Then the mixture was concentrated in vacuum and the residue was directly purified by flash column chromatography on silica gel (eluent: ethyl acetate/petroleum ether, 1:20) to afford the desired allylated oxindoles **7a-c**.

### 2.5 General Procedure for “One-pot” Synthesis of Conjugated Alkene Substituted Chromans **8**

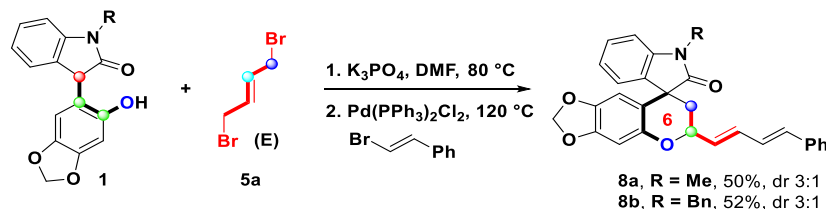

A sealed tube was charged with 3-(2-hydroxyphenyl)indolin-2-one **1** (0.1 mmol), (*E*)-1,4-dibromobut-2-ene **5a** (1.1 equiv.), K<sub>3</sub>PO<sub>4</sub> (3 equiv.), and DMF (1 mL). The mixture was stirred at 80 °C. Upon completion of the reaction as indicated by TLC analysis, Pd(PPh<sub>3</sub>)<sub>2</sub>Cl<sub>2</sub> (15 mol%) and β-bromostyrene (1 equiv.) were added to the mixture and stirred at 120 °C. When product **6** was consumed up by TLC analysis, H<sub>2</sub>O (3 mL) was added dropwise to the system at 0 °C and the resulting solution was extracted with EtOAc (5 mL×3). The combined organic extracts were dried with

anhydrous Na<sub>2</sub>SO<sub>4</sub> and concentrated in vacuo. The residue was directly purified by flash column chromatography on silica gel (eluent: ethyl acetate/petroleum ether, 1:20) to afford the desired conjugated alkene substituted chromans **8a** and **8b**.

## 2.6 General Procedure for Synthesis of Benzylated Product **10a** and Oxa-heterocycle **11a**

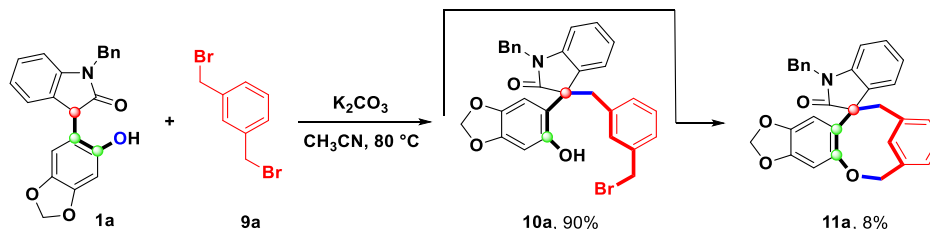

A sealed tube was charged with 3-(2-hydroxyphenyl)indolin-2-one **1** (0.1 mmol), 1,3-bis(bromomethyl)benzene **9a** (1.1 equiv.), K<sub>3</sub>PO<sub>4</sub> (3 equiv.), and CH<sub>3</sub>CN (1 mL). The mixture was stirred at 80 °C for 1 h. Then the mixture was concentrated in vacuum and the residue was directly purified by flash column chromatography on silica gel (eluent: ethyl acetate/petroleum ether, 1:20) to afford the desired benzylated product **10a** in 90% yield.

A sealed tube was charged with 3-(2-hydroxyphenyl)indolin-2-one **1** (0.1 mmol), 1,3-bis(bromomethyl)benzene **9a** (1.1 equiv.), K<sub>3</sub>PO<sub>4</sub> (3 equiv.), and CH<sub>3</sub>CN (1 mL). The mixture was stirred at 80 °C for 6 h. Then the mixture was concentrated in vacuum and the residue was directly purified by flash column chromatography on silica gel (eluent: ethyl acetate/petroleum ether, 1:20) to afford the desired oxa-heterocycle **11a** in 8% yield.

## 3. Control Experiments

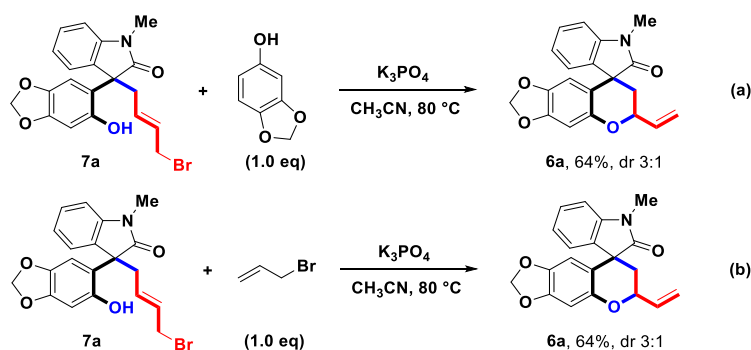

(a) A sealed tube was charged with allylated oxindole **7a** (0.1 mmol), sesamol (1 equiv.), K<sub>3</sub>PO<sub>4</sub> (3 equiv.), and CH<sub>3</sub>CN (1 mL). The mixture was stirred at 80 °C. Upon completion of the reaction as indicated by TLC analysis, the mixture was concentrated in vacuum and the residue was directly purified by flash column chromatography on silica gel (eluent: ethyl acetate/petroleum ether, 1:20). The spirooxindole-fused chroman **6a** was obtained in 64% yield.

(b) A sealed tube was charged with allylated oxindole **7a** (0.1 mmol), allyl bromide (1 equiv.), K<sub>3</sub>PO<sub>4</sub> (3 equiv.), and CH<sub>3</sub>CN (1 mL). The mixture was stirred at 80 °C. Upon completion of the reaction as indicated by TLC analysis, the mixture was concentrated in vacuum and the residue was directly purified by flash column chromatography on silica gel (eluent: ethyl acetate/petroleum ether, 1:20). The spirooxindole-fused chroman **6a** was obtained in 64% yield.

The control experiments between **7a** and sesamol/allyl bromide demonstrated that intramolecular

nucleophilic substitution completely surpassed intermolecular reaction.

#### 4. Characterization of Products

##### 1-benzyl-6',11'-dihydrospiro[indoline-3,12'-[1,3]dioxolo[4',5':4,5]benzo[1,2-b]benzo[f]oxocin]-2-one (3a)

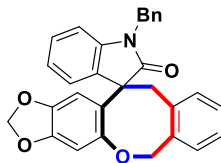

Flash column chromatography on a silica gel (ethyl acetate: petroleum ether, 1:20) afforded the product (36.2 mg, 75% yield, ar 1:1) as a faint yellow solid. (atropisomer ratio = ar)

**<sup>1</sup>H NMR** (500 MHz, CDCl<sub>3</sub>) δ 7.71 (d, *J* = 7.3 Hz, 1H), 7.42 (d, *J* = 7.2 Hz, 2H), 7.34 (t, *J* = 7.5 Hz, 3H), 7.29 (s, 5H), 7.23 (s, 3H), 7.19 – 7.09 (m, 4H), 7.05 – 6.90 (m, 5H), 6.86 – 6.75 (m, 3H), 6.75 – 6.64 (m, 2H), 6.20 (s, 1H), 5.82 – 5.60 (m, 7H), 5.11 – 4.95 (m, 5H), 4.88 (t, *J* = 13.6 Hz, 2H), 4.28 (d, *J* = 13.5 Hz, 1H), 2.94 (d, *J* = 13.5 Hz, 1H), 2.62 (d, *J* = 12.7 Hz, 1H). **<sup>13</sup>C NMR** (125 MHz, CDCl<sub>3</sub>) δ 179.1, 178.5, 152.8, 150.5, 147.8, 147.5, 144.4, 144.2, 142.4, 140.9, 136.8, 136.2, 136.1, 135.9, 135.7, 135.6, 135.5, 134.1, 133.1, 132.9, 128.9, 128.9, 128.3, 127.9, 127.8, 127.7, 127.7, 127.5, 127.3, 127.3, 127.2, 127.1, 127.0, 126.7, 126.2, 124.5, 124.3, 123.4, 122.2, 109.5, 108.9, 108.5, 107.8, 104.7, 103.9, 101.5, 57.9, 57.0, 53.5, 43.9, 43.8, 42.3, 41.9. **HRMS (ESI) m/z:** [M+Na]<sup>+</sup> calcd for C<sub>30</sub>H<sub>23</sub>NaNO<sub>4</sub> 484.1525; found: 484.1527.

##### 1-methyl-6',11'-dihydrospiro[indoline-3,12'-[1,3]dioxolo[4',5':4,5]benzo[1,2-b]benzo[f]oxocin]-2-one (3b)

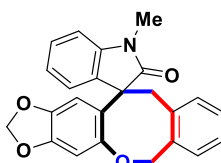

Flash column chromatography on a silica gel (ethyl acetate: petroleum ether, 1:20) afforded the product (23.1 mg, 60% yield, ar 1:1) as a faint yellow solid.

**<sup>1</sup>H NMR** (500 MHz, CDCl<sub>3</sub>) δ 7.64 (d, *J* = 7.3 Hz, 1H), 7.29 (t, *J* = 7.5 Hz, 1H), 7.25 (d, *J* = 7.4 Hz, 1H), 7.18 – 7.13 (m, 2H), 7.11 (s, 2H), 7.07 – 7.02 (m, 1H), 6.95 (d, *J* = 5.5 Hz, 3H), 6.88 (d, *J* = 7.1 Hz, 3H), 6.78 (d, *J* = 7.6 Hz, 1H), 6.67 (d, *J* = 7.6 Hz, 2H), 6.59 (s, 1H), 6.11 (s, 1H), 5.69 (dd, *J* = 10.0, 5.2 Hz, 5H), 5.58 (dd, *J* = 22.2, 14.0 Hz, 2H), 4.97 (d, *J* = 13.9 Hz, 2H), 4.74 (d, *J* = 12.8 Hz, 1H), 4.17 (d, *J* = 13.5 Hz, 1H), 3.28 (s, 3H), 3.17 (s, 3H), 2.83 (d, *J* = 13.5 Hz, 1H), 2.50 (d, *J* = 12.8 Hz, 1H). **<sup>13</sup>C NMR** (125 MHz, CDCl<sub>3</sub>) δ 179.1, 178.3, 152.7, 150.5, 147.7, 147.4, 144.3, 144.0, 143.4, 141.9, 136.7, 136.0, 135.7, 135.4, 134.1, 133.0, 132.9, 128.3, 128.0, 127.7, 127.3, 127.2, 127.1, 127.0, 127.0, 126.7, 126.1, 124.3, 124.2, 123.3, 122.2, 108.6, 108.4, 107.9, 104.6, 103.8, 101.5, 57.9, 57.0, 41.9, 41.7, 26.6, 26.4. **HRMS (ESI) m/z:** [M+H]<sup>+</sup> calcd for C<sub>24</sub>H<sub>20</sub>NO<sub>4</sub> 386.1387; found: 386.1371.

##### 1-methyl-6',11'-dihydrospiro[indoline-3,12'-[1,3]dioxolo[4',5':4,5]benzo[1,2-b]benzo[f]oxocin]-2-one (3c)

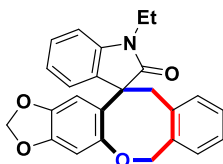

Flash column chromatography on a silica gel (ethyl acetate: petroleum ether, 1:20) afforded the product (32.3 mg, 81% yield, ar 1:1) as a faint yellow solid.

**<sup>1</sup>H NMR** (500 MHz, CDCl<sub>3</sub>) δ 7.71 (d, *J* = 6.1 Hz, 1H), 7.41 – 7.28 (m, 2H), 7.25 – 7.15 (m, 4H), 7.13 (t, *J* = 7.2 Hz, 1H), 7.08 – 6.90 (m, 6H), 6.87 (d, *J* = 7.5 Hz, 1H), 6.80–6.67 (m, 3H), 6.18 (s, 1H), 5.77 (s, 5H), 5.65 (dd, *J* = 20.1, 14.2 Hz, 2H), 5.04 (d, *J* = 13.8 Hz, 2H), 4.82 (d, *J* = 12.4 Hz, 1H), 4.25 (d, *J* = 13.4 Hz, 1H), 4.00 – 3.85 (m, 2H), 3.85–3.71 (m, 2H), 2.87 (d, *J* = 13.4 Hz, 1H), 2.55 (d, *J* = 12.6 Hz, 1H), 1.38 (t, *J* = 6.7 Hz, 3H), 1.28 (t, *J* = 6.7 Hz, 3H). **<sup>13</sup>C NMR** (125 MHz, CDCl<sub>3</sub>) δ 178.6, 177.8, 152.7, 150.5, 147.6, 147.3, 144.3, 144.0, 142.4, 140.9, 136.7, 135.9, 135.9, 135.7, 135.4, 134.3, 133.1, 132.9, 128.2, 127.9, 127.6, 127.2, 127.2, 127.1, 126.9, 126.9, 126.8, 126.3, 124.5, 124.3, 123.1, 121.9, 108.5, 108.0, 107.7, 104.6, 103.8, 101.4, 57.8, 56.8, 41.9, 41.6, 34.9, 34.7, 12.9, 12.7. **HRMS (ESI) m/z:** [M+H]<sup>+</sup> calcd for C<sub>25</sub>H<sub>22</sub>NO<sub>4</sub> 400.1543; found: 400.1520.

**1-(cyclopropylmethyl)-6',11'-dihydrospiro[indoline-3,12'-[1,3]dioxolo[4',5':4,5]benzo[1,2-b]benzo[f]oxocin]-2-one (3d)**

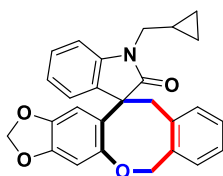

Flash column chromatography on a silica gel (ethyl acetate: petroleum ether, 1:20) afforded the product (28.0 mg, 66% yield, ar 1.3:1) as a faint yellow solid.

**<sup>1</sup>H NMR** (500 MHz, CDCl<sub>3</sub>) δ 7.70 (d, *J* = 7.3 Hz, 1H), 7.35 (t, *J* = 7.3 Hz, 1H), 7.29 (d, *J* = 7.3 Hz, 1H), 7.21 (dd, *J* = 17.3, 11.3 Hz, 4H), 7.12 (t, *J* = 7.2 Hz, 1H), 7.04 (d, *J* = 7.6 Hz, 4H), 6.98 – 6.88 (m, 3H), 6.79 – 6.64 (m, 3H), 6.24 (s, 1H), 5.77 (t, *J* = 10.0 Hz, 5H), 5.71 – 5.58 (m, 2H), 5.04 (d, *J* = 13.8 Hz, 2H), 4.83 (d, *J* = 12.8 Hz, 1H), 4.27 (d, *J* = 13.5 Hz, 1H), 3.74 (t, *J* = 6.8 Hz, 3H), 3.63 (d, *J* = 6.3 Hz, 2H), 2.88 (d, *J* = 13.5 Hz, 1H), 2.56 (d, *J* = 12.7 Hz, 1H), 1.25 (dd, *J* = 25.1, 16.7 Hz, 4H), 0.65 – 0.47 (m, 7H), 0.44 – 0.29 (m, 2H). **<sup>13</sup>C NMR** (125 MHz, CDCl<sub>3</sub>) δ 179.2, 178.4, 152.7, 150.5, 147.6, 147.4, 144.4, 144.1, 143.1, 141.4, 136.8, 135.9, 135.8, 135.7, 135.4, 134.2, 133.1, 132.9, 128.2, 127.9, 127.6, 127.2, 127.1, 127.0, 126.9, 126.8, 126.2, 124.5, 124.4, 123.1, 121.9, 108.8, 108.5, 108.3, 107.8, 104.6, 103.8, 101.4, 57.9, 56.9, 44.4, 44.2, 41.9, 41.8, 9.9, 9.7, 4.0, 3.9, 3.8, 3.7. **HRMS (ESI) m/z:** [M+H]<sup>+</sup> calcd for C<sub>27</sub>H<sub>24</sub>NO<sub>4</sub> 426.1700; found: 426.1681.

**1-allyl-6',11'-dihydrospiro[indoline-3,12'-[1,3]dioxolo[4',5':4,5]benzo[1,2-b]benzo[f]oxocin]-2-one (3e)**

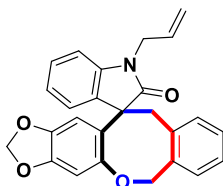

Flash column chromatography on a silica gel (ethyl acetate: petroleum ether, 1:20) afforded the product (28.8 mg, 70% yield, ar 1:1) as a faint yellow solid.

**<sup>1</sup>H NMR** (500 MHz, CDCl<sub>3</sub>) δ 7.72 (d, *J* = 6.8 Hz, 1H), 7.30 (d, *J* = 5.7 Hz, 2H), 7.19 (s, 4H), 7.13 (d, *J* = 6.7 Hz, 1H), 7.02 (d, *J* = 5.4 Hz, 3H), 6.94 (d, *J* = 6.1 Hz, 3H), 6.85 (d, *J* = 7.2 Hz, 1H), 6.74 (d, *J* = 12.7 Hz, 2H), 6.67 (s, 1H), 6.19 (s, 1H), 5.95 (d, *J* = 4.7 Hz, 1H), 5.90 – 5.72 (m, 6H), 5.72 – 5.58 (m, 2H), 5.39 – 5.14 (m, 4H), 5.04 (d, *J* = 13.8 Hz, 2H), 4.84 (d, *J* = 12.7 Hz, 1H), 4.48 (s, 2H), 4.37 (s, 2H), 4.27 (d, *J* = 13.4 Hz, 1H), 2.90 (d, *J* = 13.5 Hz, 1H), 2.59 (d, *J* = 12.7 Hz, 1H). **<sup>13</sup>C NMR** (125 MHz, CDCl<sub>3</sub>) δ 178.7, 177.9, 152.7, 150.5, 147.7, 147.4, 144.2, 144.1, 142.5, 140.9, 136.7, 135.9, 135.6, 135.4, 134.0, 133.0, 132.9, 131.5, 128.2, 127.9, 127.6, 127.3, 127.2, 127.2, 126.9, 126.7, 126.1, 124.4, 124.2, 123.3, 122.1, 117.6, 117.5, 109.3, 108.8, 108.4, 107.7, 104.6, 103.8, 101.4, 57.8, 56.9, 42.5, 42.2, 41.8. **HRMS (ESI) m/z:** [M+H]<sup>+</sup> calcd for C<sub>26</sub>H<sub>22</sub>NO<sub>4</sub> 412.1543; found: 412.1545.

**1-(prop-2-yn-1-yl)-6',11'-dihydrospiro[indoline-3,12'-[1,3]dioxolo[4',5':4,5]benzo[1,2-b]benzo[f]oxocin]-2-one (3f)**

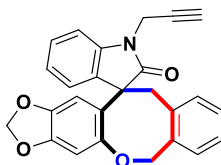

Flash column chromatography on a silica gel (ethyl acetate: petroleum ether, 1:20) afforded the product (28.2 mg, 69% yield, ar 1:1) as a faint yellow solid.

**<sup>1</sup>H NMR** (500 MHz, CDCl<sub>3</sub>) δ 7.72 (d, *J* = 7.3 Hz, 1H), 7.39 (t, *J* = 7.6 Hz, 1H), 7.34 – 7.26 (m, 2H), 7.20 (dd, *J* = 18.9, 6.9 Hz, 4H), 7.13 (t, *J* = 7.3 Hz, 1H), 7.07 (t, *J* = 8.5 Hz, 3H), 7.02 (s, 1H), 6.95 (dd, *J* = 12.7, 6.0 Hz, 2H), 6.75 (d, *J* = 6.0 Hz, 2H), 6.67 (s, 1H), 6.17 (s, 1H), 5.77 (t, *J* = 8.3 Hz, 5H), 5.65 (dd, *J* = 19.5, 14.1 Hz, 2H), 5.04 (d, *J* = 14.0 Hz, 2H), 4.81 (d, *J* = 12.8 Hz, 1H), 4.65 (s, 2H), 4.59 (d, *J* = 17.9 Hz, 1H), 4.48 (d, *J* = 18.8 Hz, 1H), 4.25 (d, *J* = 13.6 Hz, 1H), 2.89 (d, *J* = 13.6 Hz, 1H), 2.60 (d, *J* = 12.8 Hz, 1H), 2.26 (d, *J* = 13.1 Hz, 2H). **<sup>13</sup>C NMR** (125 MHz, CDCl<sub>3</sub>) δ 178.1, 177.3, 152.6, 150.4, 147.8, 147.5, 144.4, 144.1, 141.4, 139.9, 136.7, 135.8, 135.5, 135.5, 133.9, 133.0, 132.9, 128.4, 127.9, 127.7, 127.3, 127.2, 127.1, 127.0, 126.4, 126.2, 124.5, 123.9, 123.7, 122.6, 109.5, 108.9, 108.6, 107.7, 104.6, 103.8, 101.5, 72.5, 72.4, 57.8, 56.9, 41.9, 41.6, 29.6, 29.3. **HRMS (ESI) m/z:** [M+H]<sup>+</sup> calcd for C<sub>26</sub>H<sub>20</sub>NO<sub>4</sub> 410.1387; found: 410.1376.

**1-benzyl-5-methyl-6',11'-dihydrospiro[indoline-3,12'-[1,3]dioxolo[4',5':4,5]benzo[1,2-b]benzo[f]oxocin]-2-one (3g)**

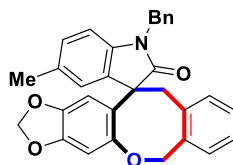

Flash column chromatography on a silica gel (ethyl acetate: petroleum ether, 1:20) afforded the product (32.3 mg, 68% yield, ar 5:4) as a faint yellow solid.

**<sup>1</sup>H NMR** (500 MHz, CDCl<sub>3</sub>) δ 7.50 (s, 1H), 7.41 (d, *J* = 7.4 Hz, 2H), 7.38 – 7.32 (m, 3H), 7.32 – 7.26 (m, 5H), 7.25 – 7.16 (m, 3H), 7.13 (t, *J* = 7.5 Hz, 1H), 7.07 – 7.00 (m, 2H), 6.97 (d, *J* = 7.4 Hz, 1H), 6.93 (d, *J* = 6.6 Hz, 2H), 6.77 (s, 1H), 6.68 (dd, *J* = 14.0, 10.0 Hz, 3H), 6.52 (s, 1H), 6.20 (s, 1H), 5.83 (s, 1H), 5.81

(s, 2H), 5.77 (d,  $J = 6.2$  Hz, 2H), 5.67 (dd,  $J = 20.0, 14.1$  Hz, 2H), 5.05 (dd,  $J = 17.3, 4.1$  Hz, 4H), 5.01 – 4.94 (m, 1H), 4.88 (t,  $J = 15.3$  Hz, 2H), 4.28 (d,  $J = 13.5$  Hz, 1H), 2.92 (d,  $J = 13.6$  Hz, 1H), 2.59 (d,  $J = 12.7$  Hz, 1H), 2.28 (s, 3H), 2.23 (s, 2H).  $^{13}\text{C NMR}$  (125 MHz,  $\text{CDCl}_3$ )  $\delta$  179.0, 178.4, 152.7, 150.5, 147.7, 147.4, 144.4, 144.1, 139.9, 138.5, 136.8, 136.3, 136.2, 135.9, 135.6, 135.4, 134.1, 133.1, 133.0, 132.9, 131.6, 128.9, 128.8, 128.5, 128.3, 127.7, 127.6, 127.6, 127.5, 127.3, 127.2, 127.2, 127.0, 126.9, 126.8, 126.7, 125.1, 124.4, 109.2, 108.7, 108.6, 107.9, 104.6, 103.8, 101.5, 57.9, 57.1, 43.9, 43.7, 42.4, 41.8, 29.7, 21.2. **HRMS (ESI) m/z:**  $[\text{M}+\text{H}]^+$  calcd for  $\text{C}_{31}\text{H}_{26}\text{NO}_4$  476.1856; found: 476.1838.

**1-benzyl-5-methoxy-6',11'-dihydrospiro[indoline-3,12'-[1,3]dioxolo[4',5':4,5]benzo[1,2-b]benzo[f]oxocin]-2-one (3h)**

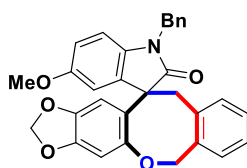

Flash column chromatography on a silica gel (ethyl acetate: petroleum ether, 1:20) afforded the product (34.4 mg, 70% yield, ar 1:1) as a faint yellow solid.

$^1\text{H NMR}$  (500 MHz,  $\text{CDCl}_3$ )  $\delta$  7.41 (d,  $J = 7.4$  Hz, 2H), 7.32 (m, 9H), 7.24 – 7.16 (m, 3H), 7.14 (d,  $J = 7.5$  Hz, 1H), 7.04 (d,  $J = 5.0$  Hz, 1H), 6.96 (d,  $J = 6.2$  Hz, 2H), 6.83 – 6.74 (m, 2H), 6.68 (dd,  $J = 20.5, 6.7$  Hz, 4H), 6.30 (d,  $J = 1.7$  Hz, 1H), 6.22 (s, 1H), 5.79 (dd,  $J = 25.3, 7.9$  Hz, 5H), 5.69 (d,  $J = 14.3$  Hz, 1H), 5.63 (d,  $J = 13.7$  Hz, 1H), 5.11 – 5.00 (m, 4H), 4.92 (dt,  $J = 30.7, 15.7$  Hz, 3H), 4.26 (d,  $J = 13.5$  Hz, 1H), 3.74 (s, 3H), 3.65 (s, 3H), 2.95 (d,  $J = 13.5$  Hz, 1H), 2.61 (d,  $J = 12.8$  Hz, 1H).  $^{13}\text{C NMR}$  (125 MHz,  $\text{CDCl}_3$ )  $\delta$  178.9, 178.2, 156.5, 155.4, 152.7, 150.5, 147.8, 147.4, 144.4, 144.2, 136.9, 136.8, 136.3, 136.2, 135.9, 135.8, 135.5, 135.2, 134.4, 133.1, 133.1, 128.9, 128.8, 127.7, 127.7, 127.6, 127.5, 127.4, 127.3, 127.3, 127.2, 127.1, 126.8, 126.6, 124.2, 113.5, 112.8, 112.4, 111.7, 109.9, 109.3, 108.5, 107.8, 104.6, 103.9, 101.5, 101.5, 58.3, 57.4, 55.8, 55.7, 44.0, 43.8, 42.4, 41.7, 29.8. **HRMS (ESI) m/z:**  $[\text{M}+\text{H}]^+$  calcd for  $\text{C}_{31}\text{H}_{26}\text{NO}_5$  492.1805; found: 492.1781.

**1-benzyl-5-bromo-6',11'-dihydrospiro[indoline-3,12'-[1,3]dioxolo[4',5':4,5]benzo[1,2-b]benzo[f]oxocin]-2-one (3i)**

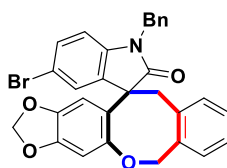

Flash column chromatography on a silica gel (ethyl acetate: petroleum ether, 1:20) afforded the product (37.2 mg, 69% yield, ar 4:3) as a faint yellow solid.

$^1\text{H NMR}$  (500 MHz,  $\text{CDCl}_3$ )  $\delta$  7.83 (s, 1H), 7.45 – 7.34 (m, 6H), 7.33-7.29 (m, 4H), 7.28-7.26 (m, 2H), 7.25 – 7.21 (m, 3H), 7.14 (t,  $J = 7.3$  Hz, 1H), 7.08-7.02 (m, 1H), 6.97 (d,  $J = 7.3$  Hz, 1H), 6.95-6.88 (s, 1H), 6.79 (m,  $J = 12.6$  Hz, 2H), 6.69 (s, 2H), 6.63 (d,  $J = 8.2$  Hz, 1H), 6.18 (s, 1H), 5.90-5.75 (m, 5H), 5.74-5.55 (m, 2H), 5.10-5.00 (m, 4H), 5.00-4.85 (m, 3H), 4.23 (d,  $J = 13.5$  Hz, 1H), 2.93 (d,  $J = 13.5$  Hz, 1H), 2.57 (d,  $J = 12.8$  Hz, 1H).  $^{13}\text{C NMR}$  (125 MHz,  $\text{CDCl}_3$ )  $\delta$  178.5, 177.8, 152.7, 150.5, 147.9, 147.6, 144.4, 144.3, 139.9, 137.5, 136.6, 135.9, 135.7, 135.6, 135.5, 134.9, 132.9, 132.8, 131.1, 130.8, 129.1, 128.9, 128.9, 127.9, 127.8, 127.7, 127.6, 127.3, 127.2, 127.1, 125.9, 123.3, 116.0, 114.9, 110.9, 110.4, 108.2, 107.6,



104.7, 103.9, 101.6, 101.5, 44.0, 43.7, 42.2, 41.7. **HRMS (ESI) m/z:**  $[M+H]^+$  calcd for  $C_{30}H_{23}BrNO_4$  540.0805; found: 540.0778.

**1-benzyl-7-methyl-6',11'-dihydrospiro[indoline-3,12'-[1,3]dioxolo[4',5':4,5]benzo[1,2-b]benzo[f]oxocin]-2-one (3j)**

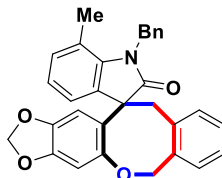

Flash column chromatography on a silica gel (ethyl acetate: petroleum ether, 1:20) afforded the product (30.9 mg, 65% yield, ar 1:1) as a faint yellow solid.

**$^1H$  NMR** (500 MHz,  $CDCl_3$ )  $\delta$  7.63 (d,  $J = 7.1$  Hz, 1H), 7.36 (t,  $J = 7.5$  Hz, 2H), 7.30 (t,  $J = 7.6$  Hz, 6H), 7.23 (d,  $J = 7.5$  Hz, 1H), 7.22 – 7.09 (m, 6H), 7.06 – 6.99 (m, 2H), 6.93 (m, 5H), 6.77 (s, 1H), 6.68 (s, 1H), 6.56 (d,  $J = 7.3$  Hz, 1H), 6.21 (s, 1H), 5.89 (s, 1H), 5.81 (s, 2H), 5.77 (d,  $J = 14.1$  Hz, 2H), 5.66 (dd,  $J = 18.8, 14.1$  Hz, 2H), 5.43 (d,  $J = 16.8$  Hz, 1H), 5.30 – 5.18 (m, 3H), 5.06 (dd,  $J = 14.0, 4.2$  Hz, 2H), 4.90 (d,  $J = 12.7$  Hz, 1H), 4.33 (d,  $J = 13.5$  Hz, 1H), 2.95 (d,  $J = 13.6$  Hz, 1H), 2.66 (d,  $J = 12.7$  Hz, 1H), 2.36 (s, 3H), 2.32 (s, 3H).  **$^{13}C$  NMR** (125 MHz,  $CDCl_3$ )  $\delta$  179.9, 179.5, 152.7, 150.4, 147.7, 147.4, 144.4, 144.1, 140.5, 139.1, 138.1, 137.9, 136.8, 136.3, 135.8, 135.5, 135.4, 134.7, 133.1, 132.1, 131.9, 128.9, 128.8, 127.5, 127.2, 127.1, 126.9, 126.9, 126.8, 125.8, 125.7, 124.6, 124.3, 123.4, 122.5, 122.1, 120.0, 119.5, 108.6, 107.9, 104.6, 103.8, 101.4, 57.2, 56.6, 45.2, 44.9, 42.9, 42.4, 19.1, 18.9. **HRMS (ESI) m/z:**  $[M+H]^+$  calcd for  $C_{31}H_{26}NO_4$  476.1856; found: 476.1841.

**1-benzyl-7-fluoro-6',11'-dihydrospiro[indoline-3,12'-[1,3]dioxolo[4',5':4,5]benzo[1,2-b]benzo[f]oxocin]-2-one (3k)**

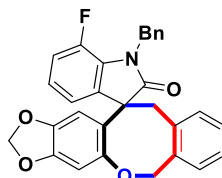

Flash column chromatography on a silica gel (ethyl acetate: petroleum ether, 1:20) afforded the product (28.7 mg, 60% yield, ar 5:4) as a faint yellow solid.

**$^1H$  NMR** (500 MHz,  $CDCl_3$ )  $\delta$  7.50 (d,  $J = 7.1$  Hz, 3H), 7.39 – 7.32 (m, 4H), 7.29 (d,  $J = 6.6$  Hz, 4H), 7.20 – 7.11 (m, 3H), 7.05 – 6.98 (m, 2H), 6.97 – 6.89 (m, 4H), 6.86 (d,  $J = 6.9$  Hz, 1H), 6.77 (s, 1H), 6.65 (s, 1H), 6.48 (d,  $J = 7.3$  Hz, 1H), 6.12 (s, 1H), 5.85 – 5.72 (m, 5H), 5.72-5.55 (m, 2H), 5.19 (dd,  $J = 38.0, 15.1$  Hz, 2H), 5.13 – 4.99 (m, 4H), 4.88 (d,  $J = 12.8$  Hz, 1H), 4.24 (d,  $J = 13.5$  Hz, 1H), 2.89 (d,  $J = 13.5$  Hz, 1H), 2.58 (d,  $J = 12.8$  Hz, 1H).  **$^{13}C$  NMR** (125 MHz,  $CDCl_3$ )  $\delta$  178.8, 178.2, 151.5 (d,  $J = 242.5$  Hz), 148.7, 147.9, 147.6, 147.2 (d,  $J = 243.7$  Hz), 144.5, 144.2, 138.5, 137.4, 137.4, 136.9, 136.8, 135.4, 135.1, 133.1, 132.9, 129.3, 128.8, 128.6, 127.8, 127.7 (d,  $J = 1.1$  Hz), 127.6, 127.4, 127.3, 127.3, 127.1 (d,  $J = 1.2$  Hz), 126.2, 123.9 (d,  $J = 0.6$  Hz), 123.7, 122.7 (d,  $J = 0.6$  Hz), 122.1, 120.4, 116.3 (d,  $J = 20.0$  Hz), 115.1 (d,  $J = 20.0$  Hz), 108.3, 107.8, 104.7, 103.9, 101.6, 101.5, 58.2, 57.2, 45.5, 45.5, 45.3, 45.3, 42.3, 42.0. **HRMS (ESI) m/z:**  $[M+H]^+$  calcd for  $C_{30}H_{23}FNO_4$  480.1606; found: 480.1583.

**1-benzyl-5,7-dimethyl-6',11'-dihydrospiro[indoline-3,12'-[1,3]dioxolo[4',5':4,5]benzo[1,2-**

**b)benzo[f]oxocin]-2-one (3l)**

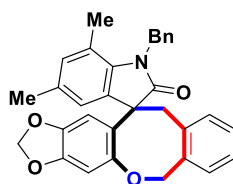

Flash column chromatography on a silica gel (ethyl acetate: petroleum ether, 1:20) afforded the product (27.8 mg, 57% yield, ar 5:4) as a faint yellow solid.

**<sup>1</sup>H NMR** (500 MHz, CDCl<sub>3</sub>) δ 7.42 (s, 1H), 7.35 (t, *J* = 7.4 Hz, 2H), 7.31 – 7.25 (m, 6H), 7.22 (d, *J* = 7.4 Hz, 1H), 7.18 (t, *J* = 6.7 Hz, 3H), 7.14 (d, *J* = 8.2 Hz, 2H), 7.11 (d, *J* = 7.3 Hz, 1H), 7.04 (d, *J* = 6.6 Hz, 1H), 6.94 (dd, *J* = 14.5, 7.2 Hz, 2H), 6.81 (s, 1H), 6.77 (s, 1H), 6.72 (s, 1H), 6.69 (s, 1H), 6.35 (s, 1H), 6.21 (s, 1H), 5.92 (s, 1H), 5.81 (s, 2H), 5.77 (d, *J* = 14.4 Hz, 2H), 5.67 (t, *J* = 13.2 Hz, 2H), 5.41 (d, *J* = 16.8 Hz, 1H), 5.23 (d, *J* = 16.9 Hz, 1H), 5.19 (s, 2H), 5.07 (s, 1H), 5.04 (s, 1H), 4.91 (d, *J* = 12.7 Hz, 1H), 4.33 (d, *J* = 13.5 Hz, 1H), 2.93 (d, *J* = 13.5 Hz, 1H), 2.63 (d, *J* = 12.7 Hz, 1H), 2.30 (s, 2H), 2.27 (s, 3H), 2.26 (s, 3H), 2.20 (s, 2H). **<sup>13</sup>C NMR** (125 MHz, CDCl<sub>3</sub>) δ 179.9, 179.4, 152.8, 150.5, 147.7, 147.4, 144.5, 144.1, 138.2, 138.0, 138.0, 136.8, 136.6, 136.4, 135.8, 135.5, 135.4, 134.8, 133.3, 133.2, 132.9, 132.6, 132.4, 131.5, 128.9, 128.8, 127.5, 127.3, 127.2, 127.2, 127.1, 127.1, 126.9, 126.9, 126.7, 125.8, 125.7, 125.0, 124.8, 123.1, 119.7, 119.3, 108.8, 108.0, 104.6, 103.8, 101.5, 57.3, 56.7, 45.1, 44.8, 42.9, 42.4, 20.9, 20.8, 18.9, 18.8. **HRMS (ESI) m/z:** [M+H]<sup>+</sup> calcd for C<sub>32</sub>H<sub>28</sub>NO<sub>4</sub> 490.2013; found: 490.2000.

**1'-benzyl-8,13-dihydrospiro[benzo[f]naphtho[1,2-b]oxocine-7,3'-indolin]-2'-one (3m)**

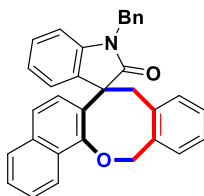

Flash column chromatography on a silica gel (ethyl acetate: petroleum ether, 1:20) afforded the product (33.6 mg, 72% yield, ar 5:4) as a faint yellow solid.

**<sup>1</sup>H NMR** (500 MHz, CDCl<sub>3</sub>) δ 8.36 (d, *J* = 8.3 Hz, 1H), 8.27 (d, *J* = 8.3 Hz, 1H), 7.75 (d, *J* = 7.3 Hz, 1H), 7.73 – 7.64 (m, 2H), 7.55 (dd, *J* = 17.1, 9.0 Hz, 2H), 7.44 (dd, *J* = 20.1, 7.0 Hz, 4H), 7.40 – 7.29 (m, 6H), 7.25 (d, *J* = 11.6 Hz, 4H), 7.19 (t, *J* = 7.3 Hz, 1H), 7.16 – 7.05 (m, 3H), 6.98 (dt, *J* = 22.8, 7.3 Hz, 3H), 6.91 (t, *J* = 6.3 Hz, 2H), 6.87 (d, *J* = 7.4 Hz, 2H), 6.80 (dd, *J* = 13.7, 7.7 Hz, 2H), 6.60 (d, *J* = 7.2 Hz, 1H), 6.41 (d, *J* = 8.6 Hz, 1H), 5.93 (d, *J* = 14.4 Hz, 1H), 5.84 (d, *J* = 13.5 Hz, 1H), 5.46 (t, *J* = 13.0 Hz, 2H), 5.19 (d, *J* = 12.8 Hz, 1H), 5.15 – 5.05 (m, 2H), 5.00 – 4.91 (m, 2H), 4.54 (d, *J* = 13.5 Hz, 1H), 3.06 (d, *J* = 13.6 Hz, 1H), 2.72 (d, *J* = 12.8 Hz, 1H). **<sup>13</sup>C NMR** (125 MHz, CDCl<sub>3</sub>) δ 179.1, 178.4, 153.4, 150.9, 142.6, 141.1, 136.8, 136.3, 136.1, 135.6, 135.4, 135.3, 135.1, 134.7, 134.3, 134.1, 133.2, 132.9, 130.2, 129.0, 128.9, 128.8, 128.2, 128.1, 128.0, 127.9, 127.8, 127.7, 127.7, 127.5, 127.4, 127.3, 127.2, 127.1, 126.9, 126.9, 126.8, 126.5, 126.4, 126.1, 126.0, 125.2, 124.7, 124.4, 123.3, 122.7, 122.1, 121.9, 109.5, 108.9, 76.7, 76.3, 58.8, 57.8, 44.0, 43.8, 42.6, 42.1. **HRMS (ESI) m/z:** [M+H]<sup>+</sup> calcd for C<sub>33</sub>H<sub>26</sub>NO<sub>2</sub> 468.1958; found: 468.1937.

**17-benzyl-5,17-dihydro-10H-[1,3]dioxolo[4'',5''':4',5']benzo[1',2':2,3]benzo[7,8]oxonino[4,5-b]indole (4a)**

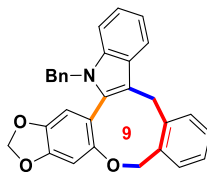

Flash column chromatography on a silica gel (ethyl acetate: petroleum ether, 1:20) afforded the product (30.3 mg, 68% yield) as a faint yellow solid.

**<sup>1</sup>H NMR** (500 MHz, CDCl<sub>3</sub>) δ 7.94 (d, *J* = 7.4 Hz, 1H), 7.84 (d, *J* = 5.5 Hz, 1H), 7.38 (t, *J* = 7.2 Hz, 1H), 7.23 – 7.15 (m, 5H), 7.15 – 7.11 (m, 1H), 7.10 – 7.05 (m, 2H), 6.98 (d, *J* = 7.4 Hz, 2H), 6.79 (s, 1H), 6.60 (s, 1H), 5.96 (s, 2H), 5.33 – 5.18 (m, 3H), 5.06 (d, *J* = 11.1 Hz, 1H), 4.15 (d, *J* = 14.1 Hz, 1H), 3.76 (d, *J* = 11.6 Hz, 1H). **<sup>13</sup>C NMR** (125 MHz, CDCl<sub>3</sub>) δ 154.4, 148.8, 143.1, 140.9, 138.2, 137.4, 136.3, 133.4, 131.4, 129.4, 128.9, 128.7, 127.8, 127.0, 126.2, 125.9, 121.5, 119.5, 119.3, 115.4, 112.3, 110.5, 109.2, 102.2, 101.6, 47.9, 31.2. **HRMS (ESI) m/z:** [M+H]<sup>+</sup> calcd for C<sub>30</sub>H<sub>24</sub>NO<sub>3</sub> 446.1751; found: 446.1738.

**17-(cyclopropylmethyl)-5,17-dihydro-10H-[1,3]dioxolo[4',5'':4',5']benzo[1',2':2,3]benzo[7,8]oxonino[4,5-b]indole (4b)**

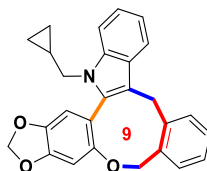

Flash column chromatography on a silica gel (ethyl acetate: petroleum ether, 1:20) afforded the product (23.7 mg, 58% yield) as a faint yellow solid.

**<sup>1</sup>H NMR** (500 MHz, CDCl<sub>3</sub>) δ 7.93 (s, 1H), 7.83 (s, 1H), 7.40 (t, *J* = 10.1 Hz, 2H), 7.17 (dd, *J* = 17.3, 8.2 Hz, 4H), 6.84 (s, 1H), 6.76 (s, 1H), 6.06 (d, *J* = 11.8 Hz, 2H), 5.34 (d, *J* = 11.0 Hz, 1H), 5.07 (d, *J* = 10.8 Hz, 1H), 4.19 (dd, *J* = 14.6, 3.8 Hz, 1H), 4.11 (d, *J* = 14.1 Hz, 1H), 3.88 – 3.62 (m, 2H), 0.97 (s, 1H), 0.41 (s, 1H), 0.29 (s, 1H), 0.16 (d, *J* = 3.8 Hz, 1H), -0.08 (d, *J* = 3.6 Hz, 1H). **<sup>13</sup>C NMR** (125 MHz, CDCl<sub>3</sub>) δ 154.6, 148.6, 143.2, 141.2, 137.4, 136.4, 133.0, 131.3, 129.5, 128.9, 127.7, 126.2, 121.2, 119.3, 119.2, 116.1, 112.4, 110.2, 109.6, 102.4, 101.8, 48.3, 31.1, 11.5, 4.2. **HRMS (ESI) m/z:** [M+H]<sup>+</sup> calcd for C<sub>27</sub>H<sub>24</sub>NO<sub>3</sub> 410.1751; found: 410.1735.

**17-allyl-5,17-dihydro-10H-[1,3]dioxolo[4',5'':4',5']benzo[1',2':2,3]benzo[7,8]oxonino[4,5-b]indole (4c)**

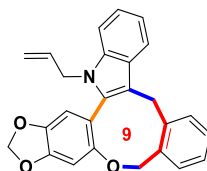

Flash column chromatography on a silica gel (ethyl acetate: petroleum ether, 1:20) afforded the product (24.9 mg, 63% yield) as a faint yellow solid.

**<sup>1</sup>H NMR** (500 MHz, CDCl<sub>3</sub>) δ 7.91 (s, 1H), 7.82 (d, *J* = 5.7 Hz, 1H), 7.36 (t, *J* = 7.3 Hz, 1H), 7.26 – 7.22 (m, 1H), 7.20 – 7.11 (m, 4H), 6.81 (d, *J* = 9.5 Hz, 2H), 6.01 (d, *J* = 3.7 Hz, 2H), 5.97 – 5.86 (m, 1H), 5.29 (d, *J* = 11.2 Hz, 1H), 5.14 (d, *J* = 10.4 Hz, 1H), 5.05 (d, *J* = 11.2 Hz, 1H), 4.94 (d, *J* = 17.2 Hz, 1H), 4.60 (s, 2H), 4.11 (d, *J* = 14.1 Hz, 1H), 3.72 (d, *J* = 11.1 Hz, 1H). **<sup>13</sup>C NMR** (125 MHz, CDCl<sub>3</sub>) δ 154.3, 148.8,

143.2, 140.9, 137.4, 136.3, 134.1, 133.2, 131.4, 129.5, 129.0, 127.7, 126.2, 121.4, 119.5, 119.3, 116.4, 115.6, 112.1, 110.4, 109.2, 102.2, 101.8, 46.8, 31.2. **HRMS (ESI) m/z:**  $[M+H]^+$  calcd for  $C_{26}H_{21}NO_3$  396.1594; found: 396.1571.

**17-(prop-2-yn-1-yl)-5,17-dihydro-10H-**

**[1,3]dioxolo[4'',5'':4',5']benzo[1',2':2,3]benzo[7,8]oxonino[4,5-b]indole (4d)**

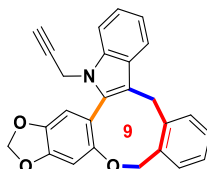

Flash column chromatography on a silica gel (ethyl acetate: petroleum ether, 1:15) afforded the product (24.3 mg, 62% yield) as a faint yellow solid.

**<sup>1</sup>H NMR** (500 MHz,  $CDCl_3$ )  $\delta$  7.92 (d,  $J = 5.6$  Hz, 1H), 7.81 (s, 1H), 7.43 (d,  $J = 7.7$  Hz, 1H), 7.36 (d,  $J = 6.5$  Hz, 1H), 7.24 – 7.11 (m, 4H), 7.01 (s, 1H), 6.83 (s, 1H), 6.06 (s, 2H), 5.31 (d,  $J = 11.0$  Hz, 1H), 5.07 (d,  $J = 10.9$  Hz, 1H), 4.80 – 4.62 (m, 2H), 4.11 (d,  $J = 14.1$  Hz, 1H), 3.72 (s, 1H), 2.35 (s, 1H). **<sup>13</sup>C NMR** (125 MHz,  $CDCl_3$ )  $\delta$  154.3, 148.9, 143.4, 140.7, 137.0, 136.1, 132.7, 131.4, 129.5, 129.1, 127.8, 126.3, 121.8, 119.9, 119.4, 115.0, 112.4, 109.9, 109.5, 102.3, 101.8, 79.2, 72.8, 34.3, 31.0. **HRMS (ESI) m/z:**  $[M+H]^+$  calcd for  $C_{26}H_{20}NO_3$  394.1438; found: 394.1420.

**17-benzyl-3-methyl-5,17-dihydro-10H-**

**[1,3]dioxolo[4'',5'':4',5']benzo[1',2':2,3]benzo[7,8]oxonino[4,5-b]indole (4e)**

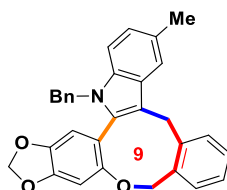

Flash column chromatography on a silica gel (ethyl acetate: petroleum ether, 1:15) afforded the product (28.5 mg, 62% yield) as a faint yellow solid.

**<sup>1</sup>H NMR** (500 MHz,  $CDCl_3$ )  $\delta$  7.84 (s, 1H), 7.70 (s, 1H), 7.39 (t,  $J = 7.0$  Hz, 1H), 7.20 (dt,  $J = 6.8, 5.8$  Hz, 5H), 6.97 (t,  $J = 5.9$  Hz, 3H), 6.89 (d,  $J = 8.2$  Hz, 1H), 6.78 (s, 1H), 6.60 (s, 1H), 5.96 (s, 2H), 5.26 (dd,  $J = 37.0, 18.2$  Hz, 3H), 5.05 (d,  $J = 10.9$  Hz, 1H), 4.11 (d,  $J = 14.0$  Hz, 1H), 3.75 (s, 1H), 2.48 (s, 3H). **<sup>13</sup>C NMR** (125 MHz,  $CDCl_3$ )  $\delta$  154.3, 148.7, 143.1, 141.0, 138.4, 136.4, 135.8, 133.5, 131.4, 129.4, 128.9, 128.7, 128.0, 127.0, 126.1, 125.9, 123.1, 119.0, 115.6, 111.8, 110.3, 109.2, 102.2, 101.7, 47.9, 31.3, 21.8. **HRMS (ESI) m/z:**  $[M+H]^+$  calcd for  $C_{31}H_{26}NO_3$  460.1907; found: 460.1880.

**1-methyl-6'-vinyl-6',7'-dihydrospiro[indoline-3,8'-[1,3]dioxolo[4,5-g]chromen]-2-one (6a)**

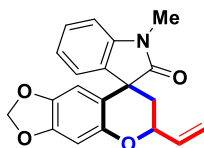

Flash column chromatography on a silica gel (ethyl acetate: petroleum ether, 1:15) afforded the product (18.8 mg, 56% yield, dr 3:1) as a faint yellow solid.

**<sup>1</sup>H NMR** (500 MHz,  $CDCl_3$ )  $\delta$  7.25 (t,  $J = 7.7$  Hz, 1H), 7.15 (d,  $J = 7.4$  Hz, 1H), 6.98 (t,  $J = 7.5$  Hz, 1H),

6.87 (d,  $J = 7.8$  Hz, 1H), 6.42 (s, 1H), 5.97 – 5.88 (m, 1H), 5.86 (s, 1H), 5.74 (s, 2H), 5.37 (d,  $J = 17.3$  Hz, 1H), 5.21 (d,  $J = 10.6$  Hz, 1H), 4.74 (dd,  $J = 11.8, 5.7$  Hz, 1H), 3.25 (s, 3H), 2.39 – 2.27 (m, 1H), 1.79 (dd,  $J = 13.5, 1.9$  Hz, 1H).  $^{13}\text{C NMR}$  (125 MHz,  $\text{CDCl}_3$ )  $\delta$  179.3, 150.3, 147.9, 142.5, 142.4, 136.7, 136.4, 128.4, 124.2, 123.0, 117.3, 111.8, 108.5, 106.0, 101.1, 99.1, 72.9, 49.9, 37.9, 26.8. **HRMS (ESI)  $m/z$ :**  $[\text{M}+\text{H}]^+$  calcd. for  $\text{C}_{20}\text{H}_{18}\text{NO}_4$ : 336.1230, found: 336.1212.

#### 1-benzyl-6'-vinyl-6',7'-dihydrospiro[indoline-3,8'-[1,3]dioxolo[4,5-g]chromen]-2-one (6b)

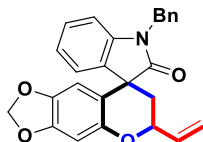

Flash column chromatography on a silica gel (ethyl acetate: petroleum ether, 1:20) afforded the product (23.8 mg, 58% yield, dr 3:1) as a faint yellow solid.

$^1\text{H NMR}$  (500 MHz,  $\text{CDCl}_3$ )  $\delta$  7.35 (d,  $J = 4.3$  Hz, 4H), 7.29 (dd,  $J = 8.5, 4.3$  Hz, 1H), 7.20 (dd,  $J = 10.1, 7.7$  Hz, 2H), 7.01 (t,  $J = 7.5$  Hz, 1H), 6.84 (d,  $J = 7.8$  Hz, 1H), 6.51 (s, 1H), 6.06 – 5.97 (m, 1H), 5.96 (s, 1H), 5.82 (d,  $J = 3.7$  Hz, 2H), 5.46 (d,  $J = 17.2$  Hz, 1H), 5.29 (d,  $J = 10.6$  Hz, 1H), 5.00 (q,  $J = 15.5$  Hz, 2H), 4.82 (dd,  $J = 11.9, 5.8$  Hz, 1H), 2.48 (t,  $J = 12.8$  Hz, 1H), 1.91 (d,  $J = 13.5$  Hz, 1H).  $^{13}\text{C NMR}$  (125 MHz,  $\text{CDCl}_3$ )  $\delta$  179.4, 150.3, 148.0, 142.4, 141.5, 136.6, 136.4, 135.8, 128.9, 128.3, 127.8, 127.4, 124.3, 122.9, 117.4, 111.8, 109.5, 106.1, 101.1, 99.2, 72.9, 49.8, 44.2, 38.1. **HRMS (ESI)  $m/z$ :**  $[\text{M}+\text{H}]^+$  calcd. for  $\text{C}_{26}\text{H}_{22}\text{NO}_4$ : 412.1543, found: 412.1539.

#### 1-allyl-6'-vinyl-6',7'-dihydrospiro[indoline-3,8'-[1,3]dioxolo[4,5-g]chromen]-2-one (6c)

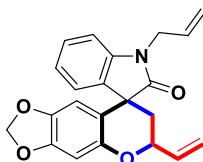

Flash column chromatography on a silica gel (ethyl acetate: petroleum ether, 1:20) afforded the product (19.9 mg, 55% yield, dr 2.5:1) as a faint yellow solid.

$^1\text{H NMR}$  (500 MHz,  $\text{CDCl}_3$ )  $\delta$  7.22 (d,  $J = 7.7$  Hz, 1H), 7.15 (d,  $J = 7.4$  Hz, 1H), 6.97 (t,  $J = 7.5$  Hz, 1H), 6.86 (d,  $J = 7.8$  Hz, 1H), 6.42 (s, 1H), 5.98 – 5.88 (m, 1H), 5.88 (s, 1H), 5.86 – 5.78 (m, 1H), 5.75 (s, 2H), 5.38 (d,  $J = 17.2$  Hz, 1H), 5.29 – 5.12 (m, 3H), 4.75 (dd,  $J = 11.7, 5.7$  Hz, 1H), 4.36 (d,  $J = 15.9$  Hz, 2H), 2.35 (t,  $J = 12.8$  Hz, 1H), 1.80 (dd,  $J = 13.5, 1.7$  Hz, 1H).  $^{13}\text{C NMR}$  (125 MHz,  $\text{CDCl}_3$ )  $\delta$  178.9, 150.3, 147.9, 142.4, 141.6, 136.6, 136.4, 131.3, 128.3, 124.3, 122.9, 117.9, 117.4, 111.8, 109.4, 106.0, 101.2, 99.2, 72.9, 49.8, 42.7, 38.1. **HRMS (ESI)  $m/z$ :**  $[\text{M}+\text{H}]^+$  calcd. for  $\text{C}_{22}\text{H}_{20}\text{NO}_4$ : 362.1387, found: 362.1370.

#### 1-(prop-2-yn-1-yl)-6'-vinyl-6',7'-dihydrospiro[indoline-3,8'-[1,3]dioxolo[4,5-g]chromen]-2-one (6d)

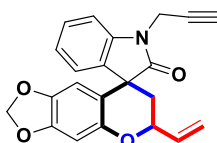

Flash column chromatography on a silica gel (ethyl acetate: petroleum ether, 1:20) afforded the product (19.4 mg, 54% yield, dr 3:1) a faint yellow solid.

**<sup>1</sup>H NMR** (500 MHz, CDCl<sub>3</sub>) δ 7.28 (dd, *J* = 11.1, 4.3 Hz, 1H), 7.20 – 7.15 (m, 1H), 7.08 (d, *J* = 7.8 Hz, 1H), 7.02 (t, *J* = 7.5 Hz, 1H), 6.42 (s, 1H), 5.96 – 5.89 (m, 1H), 5.88 (d, *J* = 5.7 Hz, 1H), 5.74 (s, 2H), 5.37 (d, *J* = 17.3 Hz, 1H), 5.21 (d, *J* = 10.6 Hz, 1H), 4.74 (dd, *J* = 11.5, 5.8 Hz, 1H), 4.53 (m, 2H), 2.33 (dd, *J* = 13.4, 12.4 Hz, 1H), 2.2 (s, 1H), 1.83 (dd, *J* = 13.6, 2.0 Hz, 1H). **<sup>13</sup>C NMR** (125 MHz, CDCl<sub>3</sub>) δ 178.4, 150.2, 148.1, 142.4, 140.5, 136.6, 136.2, 128.4, 124.4, 123.4, 117.4, 111.6, 109.6, 105.9, 101.2, 99.2, 72.9, 72.6, 49.7, 37.8, 29.7. **HRMS (ESI) m/z**: [M+H]<sup>+</sup> calcd. for C<sub>22</sub>H<sub>18</sub>NO<sub>4</sub>: 360.1230, found: 360.1211.

**1-benzyl-5-methyl-6'-vinyl-6',7'-dihydrospiro[indoline-3,8'-[1,3]dioxolo[4,5-g]chromen]-2-one (6e)**

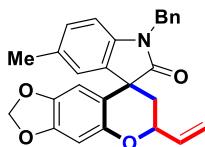

Flash column chromatography on a silica gel (ethyl acetate: petroleum ether, 1:20) afforded the product (22.9 mg, 54% yield, dr 2.5:1) a faint yellow solid.

**<sup>1</sup>H NMR** (500 MHz, CDCl<sub>3</sub>) δ 7.26 (dd, *J* = 10.1, 2.9 Hz, 4H), 7.21 (m, 1H), 6.94 (s, 1H), 6.92 (d, *J* = 8.0 Hz, 1H), 6.64 (d, *J* = 7.9 Hz, 1H), 6.43 (s, 1H), 5.94 (m, 1H), 5.89 (s, 1H), 5.75 (dd, *J* = 2.4, 1.4 Hz, 2H), 5.40 (m, 1H), 5.23 (m, 1H), 4.91 (q, *J* = 15.5 Hz, 2H), 4.79 – 4.71 (m, 1H), 2.39 (dd, *J* = 13.4, 12.3 Hz, 1H), 2.19 (s, 3H), 1.83 (dd, *J* = 13.5, 2.0 Hz, 1H). **<sup>13</sup>C NMR** (125 MHz, CDCl<sub>3</sub>) δ 179.4, 150.3, 147.9, 142.4, 139.1, 136.7, 136.5, 135.9, 132.6, 128.9, 128.6, 127.8, 127.4, 125.2, 117.3, 112.0, 109.3, 106.2, 101.2, 99.1, 72.9, 49.9, 44.2, 38.1, 21.1. **HRMS (ESI) m/z**: [M+H]<sup>+</sup> calcd. for C<sub>27</sub>H<sub>24</sub>NO<sub>4</sub>: 426.1700, found: 426.1680.

**1-benzyl-5-methoxy-6'-vinyl-6',7'-dihydrospiro[indoline-3,8'-[1,3]dioxolo[4,5-g]chromen]-2-one (6f)**

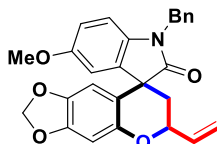

Flash column chromatography on a silica gel (ethyl acetate: petroleum ether, 1:20) afforded the product (26.9 mg, 61% yield, dr 3:1) a faint yellow solid.

**<sup>1</sup>H NMR** (500 MHz, CDCl<sub>3</sub>) δ 7.38 – 7.32 (m, 4H), 7.32 – 7.27 (m, 1H), 6.81 (d, *J* = 1.9 Hz, 1H), 6.72 (t, *J* = 6.0 Hz, 2H), 6.50 (s, 1H), 6.06 – 5.98 (m, 1H), 5.97 (s, 1H), 5.83 (d, *J* = 1.2 Hz, 2H), 5.46 (d, *J* = 17.3 Hz, 1H), 5.30 (d, *J* = 10.6 Hz, 1H), 4.98 (q, *J* = 15.5 Hz, 2H), 4.80 (dd, *J* = 11.5, 5.8 Hz, 1H), 3.71 (s, 3H), 2.55 – 2.42 (m, 1H), 1.91 (dd, *J* = 13.5, 2.0 Hz, 1H). **<sup>13</sup>C NMR** (125 MHz, CDCl<sub>3</sub>) δ 179.1, 156.2, 150.3, 148.0, 142.4, 137.7, 136.6, 135.9, 134.9, 128.9, 127.8, 127.4, 117.4, 112.2, 112.1, 111.8, 109.8, 106.1, 101.1, 99.2, 72.9, 55.8, 50.2, 44.3, 38.1. **HRMS (ESI) m/z**: [M+H]<sup>+</sup> calcd. for C<sub>27</sub>H<sub>24</sub>NO<sub>5</sub>: 442.1649, found: 442.1622.

**1-benzyl-5-bromo-6'-vinyl-6',7'-dihydrospiro[indoline-3,8'-[1,3]dioxolo[4,5-g]chromen]-2-one (6g)**

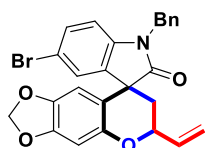

Flash column chromatography on a silica gel (ethyl acetate: petroleum ether, 1:20) afforded the product (29.5 mg, 60% yield, dr 2:1) a faint yellow solid.

**<sup>1</sup>H NMR** (500 MHz, CDCl<sub>3</sub>) δ 7.38 – 7.34 (m, 2H), 7.31 (d, *J* = 8.0 Hz, 5H), 6.70 (d, *J* = 8.1 Hz, 1H), 6.52 (d, *J* = 9.3 Hz, 1H), 6.01 (m, 1H), 5.93 (s, 1H), 5.86 (d, *J* = 10.1 Hz, 2H), 5.49 (d, *J* = 17.2 Hz, 1H), 5.32 (d, *J* = 10.4 Hz, 1H), 4.98 (q, *J* = 15.5 Hz, 2H), 4.75 (dd, *J* = 11.9, 5.6 Hz, 1H), 2.47 (t, *J* = 12.9 Hz, 1H), 1.91 (d, *J* = 13.4 Hz, 1H). **<sup>13</sup>C NMR** (125 MHz, CDCl<sub>3</sub>) δ 178.8, 150.4, 148.3, 142.5, 140.6, 138.3, 136.4, 135.4, 131.2, 129.0, 128.0, 127.5, 127.3, 117.5, 115.8, 111.0, 110.9, 105.9, 101.2, 99.3, 72.7, 49.9, 44.3, 38.0. **HRMS (ESI) m/z:** [M+H]<sup>+</sup> calcd. for C<sub>26</sub>H<sub>21</sub>BrNO<sub>4</sub>: 492.0628, found: 492.0626.

**1-benzyl-6-bromo-6'-vinyl-6',7'-dihydrospiro[indoline-3,8'-[1,3]dioxolo[4,5-g]chromen]-2-one (6h)**

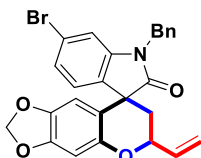

Flash column chromatography on a silica gel (ethyl acetate: petroleum ether, 1:20) afforded the product (25.0 mg, 51% yield, dr 2:1, mixture) a faint yellow solid.

**<sup>1</sup>H NMR** (500 MHz, CDCl<sub>3</sub>) δ 7.41 – 7.27 (m, 7H), 7.19 – 7.13 (m, 1H), 7.07 (d, *J* = 7.9 Hz, 1H), 6.93 (dd, *J* = 22.9, 15.8 Hz, 2H), 6.51 (d, *J* = 12.4 Hz, 1H), 5.99 (m, 1H), 5.92 (s, 1H), 5.88 – 5.78 (m, 3H), 5.48 (dd, *J* = 24.2, 17.3 Hz, 1H), 5.40 (dd, *J* = 10.0, 6.1 Hz, 1H), 5.30 (d, *J* = 10.5 Hz, 1H), 4.97 (q, *J* = 15.6 Hz, 2H), 4.83 (d, *J* = 15.6 Hz, 1H), 4.75 (dd, *J* = 11.8, 5.8 Hz, 1H), 2.45 (t, *J* = 12.8 Hz, 1H), 2.15 – 2.02 (m, 1H), 1.88 (d, *J* = 13.4 Hz, 1H). **<sup>13</sup>C NMR** (125 MHz, CDCl<sub>3</sub>) δ 179.2, 179.1, 151.0, 150.3, 148.2, 148.1, 144.0, 142.9, 142.5, 142.1, 136.6, 136.4, 135.3, 135.2, 133.0, 129.1, 129.1, 128.1, 127.9, 127.3, 127.2, 126.3, 125.8, 125.6, 125.1, 122.0, 121.9, 117.6, 117.3, 112.8, 112.5, 111.2, 111.1, 105.9, 105.9, 101.2, 101.2, 99.4, 99.2, 72.9, 71.9, 49.6, 48.3, 44.3, 43.9, 38.1, 37.2. **HRMS (ESI) m/z:** [M+H]<sup>+</sup> calcd. for C<sub>26</sub>H<sub>21</sub>BrNO<sub>4</sub>: 492.0628, found: 492.0626.

**1-benzyl-7-chloro-6'-vinyl-6',7'-dihydrospiro[indoline-3,8'-[1,3]dioxolo[4,5-g]chromen]-2-one (6i)**

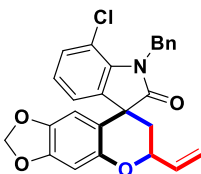

Flash column chromatography on a silica gel (ethyl acetate: petroleum ether, 1:20) afforded the product (25.8 mg, 58% yield, dr 2:1) a faint yellow solid.

**<sup>1</sup>H NMR** (500 MHz, CDCl<sub>3</sub>) δ 7.27 (d, *J* = 7.7 Hz, 1H), 7.25 – 7.17 (m, 4H), 7.12 (d, *J* = 8.2 Hz, 1H), 7.05 (d, *J* = 7.4 Hz, 1H), 6.89 (t, *J* = 7.8 Hz, 1H), 6.43 (s, 1H), 5.98 – 5.90 (m, 1H), 5.89 (d, *J* = 4.0 Hz, 1H), 5.76 (s, 2H), 5.40 (t, *J* = 15.4 Hz, 2H), 5.33 (d, *J* = 16.0 Hz, 1H), 5.23 (d, *J* = 10.5 Hz, 1H), 4.71 (dd, *J* = 11.6, 5.8 Hz, 1H), 2.39 (t, *J* = 12.9 Hz, 1H), 1.84 (dd, *J* = 13.5, 1.7 Hz, 1H). **<sup>13</sup>C NMR** (125 MHz, CDCl<sub>3</sub>) δ 180.1, 150.4, 148.2, 142.5, 139.2, 137.8, 137.6, 136.4, 130.9, 128.7, 127.4, 126.7, 123.9, 123.1, 117.6, 115.8, 111.3, 106.0, 101.3, 99.2, 72.7, 49.6, 45.3, 38.6. **HRMS (ESI) m/z:** [M+H]<sup>+</sup> calcd. for C<sub>26</sub>H<sub>21</sub>ClNO<sub>4</sub>: 446.1154, found: 446.1131.

**1-benzyl-7-fluoro-6'-vinyl-6',7'-dihydrospiro[indoline-3,8'-[1,3]dioxolo[4,5-g]chromen]-2-one (6j)**

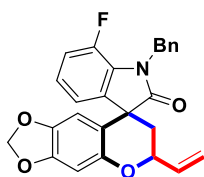

Flash column chromatography on a silica gel (ethyl acetate: petroleum ether, 1:20) afforded the product (25.7 mg, 60% yield, dr 2.5:1) a faint yellow solid.

**<sup>1</sup>H NMR** (500 MHz, CDCl<sub>3</sub>) δ 7.33 (d, *J* = 7.6 Hz, 2H), 7.27 (t, *J* = 7.4 Hz, 2H), 7.21 (dd, *J* = 13.9, 6.6 Hz, 1H), 6.95 – 6.83 (m, 3H), 6.42 (s, 1H), 5.98 – 5.88 (m, 1H), 5.84 (s, 1H), 5.76 (dd, *J* = 5.4, 1.1 Hz, 2H), 5.38 (d, *J* = 17.2 Hz, 1H), 5.23 (d, *J* = 10.6 Hz, 1H), 5.12 – 5.02 (m, 2H), 4.70 (dd, *J* = 11.9, 5.7 Hz, 1H), 2.42 – 2.30 (m, 1H), 1.82 (dd, *J* = 13.5, 2.0 Hz, 1H). **<sup>13</sup>C NMR** (125 MHz, CDCl<sub>3</sub>) δ 179.2, 150.3, 148.2, 147.6 (d, *J* = 245.0 Hz), 142.3, 139.2, 137.2, 136.5, 128.7, 128.4 (d, *J* = 7.5 Hz), 127.8, 127.7, 123.7 (d, *J* = 6.3 Hz), 120.3, 117.5, 116.5 (d, *J* = 20.0 Hz), 111.4, 105.9, 101.2, 99.2, 72.8, 50.1, 45.8, 45.7, 38.2. **HRMS (ESI) m/z:** [M+H]<sup>+</sup> calcd. for C<sub>26</sub>H<sub>21</sub>FNO<sub>4</sub>: 430.1449, found: 430.1422.

**1-benzyl-7-bromo-6'-vinyl-6',7'-dihydrospiro[indoline-3,8'-[1,3]dioxolo[4,5-g]chromen]-2-one (6k)**

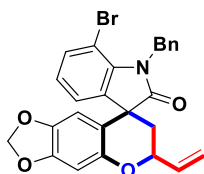

Flash column chromatography on a silica gel (ethyl acetate: petroleum ether, 1:20) afforded the product (28.5 mg, 58% yield, dr 3:1) a faint yellow solid.

**<sup>1</sup>H NMR** (500 MHz, CDCl<sub>3</sub>) δ 7.31 (dd, *J* = 8.2, 1.0 Hz, 1H), 7.29 – 7.24 (m, 2H), 7.22 – 7.17 (m, 3H), 7.12 – 7.07 (m, 1H), 6.83 (t, *J* = 7.8 Hz, 1H), 6.43 (s, 1H), 5.98 – 5.90 (m, 1H), 5.89 (s, 1H), 5.76 (d, *J* = 1.5 Hz, 2H), 5.47 (d, *J* = 16.3 Hz, 1H), 5.43 – 5.34 (m, 2H), 5.23 (d, *J* = 10.5 Hz, 1H), 4.71 (dd, *J* = 11.5, 5.9 Hz, 1H), 2.38 (dd, *J* = 13.4, 12.4 Hz, 1H), 1.84 (dd, *J* = 13.5, 2.0 Hz, 1H). **<sup>13</sup>C NMR** (125 MHz, CDCl<sub>3</sub>) δ 180.3, 150.4, 148.2, 142.5, 139.5, 139.3, 137.5, 136.4, 134.3, 128.7, 127.3, 126.5, 124.2, 123.7, 117.6, 111.2, 106.1, 102.9, 101.3, 99.2, 72.6, 49.5, 44.9, 38.7. **HRMS (ESI) m/z:** [M+H]<sup>+</sup> calcd. for C<sub>26</sub>H<sub>21</sub>BrNO<sub>4</sub>: 492.0628, found: 492.0615.

**1'-benzyl-2-vinyl-2,3-dihydrospiro[benzo[h]chromene-4,3'-indolin]-2'-one (6l)**

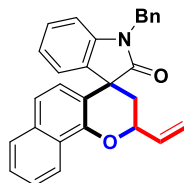

Flash column chromatography on a silica gel (ethyl acetate: petroleum ether, 1:20) afforded the product (25.4 mg, 61% yield, dr 2.5:1) a faint yellow solid.

**<sup>1</sup>H NMR** (500 MHz, CDCl<sub>3</sub>) δ 8.26 (d, *J* = 8.0 Hz, 1H), 7.64 (d, *J* = 7.5 Hz, 1H), 7.42 (m, 2H), 7.35 – 7.27 (m, 4H), 7.24 (d, *J* = 6.8 Hz, 1H), 7.18 (s, 1H), 7.17 – 7.09 (m, 2H), 6.91 (t, *J* = 7.5 Hz, 1H), 6.80 (d, *J* = 7.8 Hz, 1H), 6.54 (d, *J* = 8.5 Hz, 1H), 6.17 – 5.99 (m, 1H), 5.55 (d, *J* = 17.3 Hz, 1H), 5.31 (d, *J* = 10.6 Hz, 1H), 5.06 – 4.90 (m, 3H), 2.64 – 2.49 (m, 1H), 2.00 (dd, *J* = 13.4, 2.0 Hz, 1H). **<sup>13</sup>C NMR** (125 MHz, CDCl<sub>3</sub>) δ 179.4, 150.5, 141.8, 136.7, 136.3, 135.9, 133.9, 128.9, 128.4, 127.8, 127.5, 127.5, 126.6, 125.7, 125.5,



124.9, 124.6, 122.9, 121.9, 121.1, 117.2, 114.0, 109.5, 73.0, 50.1, 44.3, 38.3. **HRMS (ESI) m/z:** [M+H]<sup>+</sup> calcd. for C<sub>29</sub>H<sub>24</sub>NO<sub>2</sub>: 418.1802, found: 418.1786.

### 3-(4-bromobut-2-en-1-yl)-3-(6-hydroxybenzo[d][1,3]dioxol-5-yl)-1-methylindolin-2-one (7a)

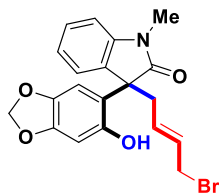

Flash column chromatography on a silica gel (ethyl acetate: petroleum ether, 1:15) afforded the product (38.2 mg, 92% yield) a faint yellow solid.

**<sup>1</sup>H NMR** (500 MHz, CDCl<sub>3</sub>) δ 10.44 (s, 1H), 7.37 – 7.29 (m, 2H), 7.20 – 7.17 (m, 1H), 6.87 (d, *J* = 7.7 Hz, 1H), 6.53 (s, 1H), 6.42 (s, 1H), 5.81 (d, *J* = 1.3 Hz, 1H), 5.75 (d, *J* = 1.3 Hz, 1H), 5.58 (m, 1H), 5.25 – 5.16 (m, 1H), 3.70 – 3.60 (m, 2H), 3.26 – 3.19 (m, 1H), 3.16 (s, 3H), 2.93 (dd, *J* = 13.7, 6.3 Hz, 1H). **<sup>13</sup>C NMR** (125 MHz, CDCl<sub>3</sub>) δ 180.9, 152.5, 147.9, 142.9, 141.1, 131.2, 129.8, 129.5, 128.9, 126.5, 123.4, 114.9, 109.4, 107.9, 102.2, 101.3, 57.4, 36.9, 32.2, 26.6. **HRMS (ESI) m/z:** [M+H]<sup>+</sup> calcd. for C<sub>20</sub>H<sub>19</sub>BrNO<sub>4</sub>: 416.0492, found: 416.0477.

### 3-(4-bromobut-2-en-1-yl)-3-(6-hydroxybenzo[d][1,3]dioxol-5-yl)-1-(prop-2-yn-1-yl)indolin-2-one (7b)

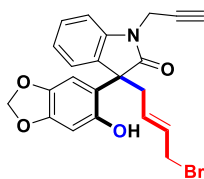

Flash column chromatography on a silica gel (ethyl acetate: petroleum ether, 1:15) afforded the product (39.5 mg, 90% yield) a faint yellow solid.

**<sup>1</sup>H NMR** (500 MHz, CDCl<sub>3</sub>) δ 9.95 (s, 1H), 7.34 (dd, *J* = 17.6, 8.1 Hz, 2H), 7.20 (d, *J* = 8.2 Hz, 1H), 7.08 (d, *J* = 7.8 Hz, 1H), 6.48 (dd, *J* = 34.0, 1.0 Hz, 2H), 5.79 (d, *J* = 29.4 Hz, 2H), 5.56 (dd, *J* = 15.0, 7.5 Hz, 1H), 5.19 (dt, *J* = 14.8, 7.3 Hz, 1H), 4.43 (q, *J* = 17.7 Hz, 2H), 3.63 (p, *J* = 9.8 Hz, 2H), 3.27 (dd, *J* = 13.5, 8.7 Hz, 1H), 2.90 (dd, *J* = 13.6, 6.2 Hz, 1H), 2.18 (d, *J* = 1.7 Hz, 1H). **<sup>13</sup>C NMR** (125 MHz, CDCl<sub>3</sub>) δ 179.0, 151.2, 147.0, 140.2, 140.1, 130.3, 128.7, 128.0, 127.8, 125.4, 122.6, 113.7, 109.2, 106.8, 101.1, 100.3, 75.2, 71.9, 56.2, 36.4, 31.1, 28.7. **HRMS (ESI) m/z:** [M+H]<sup>+</sup> calcd. for C<sub>22</sub>H<sub>19</sub>BrNO<sub>4</sub>: 440.0492, found: 440.0473.

### 1-benzyl-3-(4-bromobut-2-en-1-yl)-7-fluoro-3-(6-hydroxybenzo[d][1,3]dioxol-5-yl)indolin-2-one (7c)

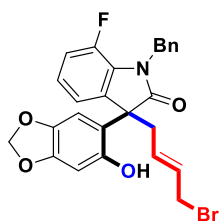

Flash column chromatography on a silica gel (ethyl acetate: petroleum ether, 1:15) afforded the product (47.3 mg, 93% yield) a faint yellow solid.

**<sup>1</sup>H NMR** (500 MHz, CDCl<sub>3</sub>) δ 9.97 (s, 1H), 7.25 – 7.21 (m, 4H), 7.19 (m, 1H), 7.08 (m, 2H), 6.99 (m, 1H),

6.51 (s, 1H), 6.37 (s, 1H), 5.81 (d,  $J = 1.1$  Hz, 1H), 5.76 (d,  $J = 1.1$  Hz, 1H), 5.52 (m, 1H), 5.13 (m, 1H), 5.00 (d,  $J = 15.3$  Hz, 1H), 4.91 (d,  $J = 15.4$  Hz, 1H), 3.52 (m, 2H), 3.36 (dd,  $J = 13.8, 8.2$  Hz, 1H), 2.85 (dd,  $J = 13.8, 6.7$  Hz, 1H).  $^{13}\text{C}$  NMR (125 MHz,  $\text{CDCl}_3$ )  $\delta$  179.8, 151.2, 147.1 (d,  $J = 245.0$  Hz), 147.1, 140.2, 135.2, 131.9 (d,  $J = 2.5$  Hz), 130.6, 127.7, 127.7, 126.8, 126.5 (d,  $J = 1.3$  Hz), 122.9 (d,  $J = 6.3$  Hz), 121.2 (d,  $J = 3.8$  Hz), 115.9 (d,  $J = 20$  Hz), 113.7, 106.5, 101.1, 100.3, 56.4, 44.9, 36.5, 30.8. **HRMS (ESI) m/z:**  $[\text{M}+\text{H}]^+$  calcd. for  $\text{C}_{26}\text{H}_{22}\text{BrFNO}_4$ : 510.0711, found: 510.0690.

**1-methyl-6'-((1E,3E)-4-phenylbuta-1,3-dien-1-yl)-6',7'-dihydrospiro[indoline-3,8'-[1,3]dioxolo[4,5-g]chromen]-2-one (8a)**

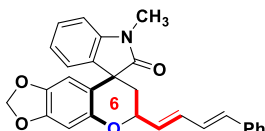

Flash column chromatography on a silica gel (ethyl acetate: petroleum ether, 1:20) afforded the product (21.9 mg, 50% yield, dr 3:1) as a faint yellow solid.

$^1\text{H}$  NMR (500 MHz,  $\text{CDCl}_3$ )  $\delta$  7.43 (d,  $J = 7.5$  Hz, 2H), 7.37 – 7.33 (m, 3H), 7.28 (d,  $J = 4.7$  Hz, 2H), 7.10 (t,  $J = 7.4$  Hz, 1H), 6.98 (d,  $J = 7.8$  Hz, 1H), 6.85 – 6.78 (m, 1H), 6.66 – 6.57 (m, 2H), 6.53 (s, 1H), 6.02 – 5.91 (m, 2H), 5.87 – 5.82 (m, 2H), 4.94 (dd,  $J = 11.6, 6.6$  Hz, 1H), 3.35 (d,  $J = 4.8$  Hz, 3H), 2.53 – 2.44 (m, 1H), 1.92 (dd,  $J = 13.6, 1.8$  Hz, 1H).  $^{13}\text{C}$  NMR (125 MHz,  $\text{CDCl}_3$ )  $\delta$  179.3, 150.3, 147.9, 142.5, 142.4, 136.9, 136.4, 133.9, 132.9, 131.2, 128.7, 128.4, 127.8, 127.8, 126.5, 124.2, 123.0, 111.8, 108.5, 106.1, 101.2, 99.1, 72.8, 49.9, 38.1, 26.8. **HRMS (ESI) m/z:**  $[\text{M}+\text{H}]^+$  calcd. for  $\text{C}_{28}\text{H}_{24}\text{NO}_4$ : 438.1700, found: 438.1683.

**1-benzyl-6'-((1E,3E)-4-phenylbuta-1,3-dien-1-yl)-6',7'-dihydrospiro[indoline-3,8'-[1,3]dioxolo[4,5-g]chromen]-2-one (8b)**

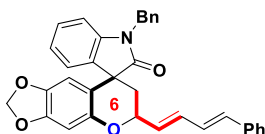

Flash column chromatography on a silica gel (ethyl acetate: petroleum ether, 1:20) afforded the product (26.7 mg, 52% yield, dr 3:1) a faint yellow solid.

$^1\text{H}$  NMR (500 MHz,  $\text{CDCl}_3$ )  $\delta$  7.41 (d,  $J = 7.6$  Hz, 2H), 7.37 – 7.29 (m, 8H), 7.25 – 7.19 (m, 3H), 7.03 (t,  $J = 7.5$  Hz, 1H), 6.88 – 6.82 (m, 1H), 6.82 – 6.77 (m, 1H), 6.60 (dd,  $J = 15.5, 4.4$  Hz, 1H), 6.53 (s, 1H), 6.04 – 5.91 (m, 2H), 5.83 (t,  $J = 6.1$  Hz, 2H), 5.08 – 4.91 (m, 3H), 2.58 – 2.50 (m, 1H), 1.95 (dd,  $J = 13.5, 1.6$  Hz, 1H).  $^{13}\text{C}$  NMR (125 MHz,  $\text{CDCl}_3$ )  $\delta$  179.4, 150.4, 148.0, 142.4, 141.6, 136.9, 136.4, 135.9, 134.0, 133.0, 131.2, 128.9, 128.7, 128.3, 127.8, 127.8, 127.7, 127.4, 126.6, 124.3, 123.0, 111.8, 109.6, 106.1, 101.2, 99.2, 72.7, 49.9, 44.2, 38.5. **HRMS (ESI) m/z:**  $[\text{M}+\text{H}]^+$  calcd. for  $\text{C}_{34}\text{H}_{28}\text{NO}_4$ : 514.2013, found: 514.1994.

**1-benzyl-3-(3-(bromomethyl)benzyl)-3-(6-hydroxybenzo[d][1,3]dioxol-5-yl)indolin-2-one (10a)**

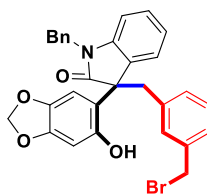

Flash column chromatography on a silica gel (ethyl acetate: petroleum ether, 1:20) afforded the product (48.7 mg, 90% yield) a faint yellow solid.

$^1\text{H NMR}$  (500 MHz,  $\text{CDCl}_3$ )  $\delta$  10.71 (s, 1H), 7.31 – 7.27 (m, 1H), 7.17 – 7.12 (m, 2H), 7.12 – 7.05 (m, 4H), 6.96 (t,  $J = 7.6$  Hz, 1H), 6.78 – 6.70 (m, 2H), 6.61 (d,  $J = 6.5$  Hz, 3H), 6.50 (dd,  $J = 10.2, 2.9$  Hz, 2H), 5.80 (dd,  $J = 23.9, 1.2$  Hz, 2H), 4.77 (d,  $J = 16.0$  Hz, 1H), 4.48 (d,  $J = 16.0$  Hz, 1H), 4.15 (q,  $J = 10.2$  Hz, 2H), 4.05 (d,  $J = 13.4$  Hz, 1H), 3.33 (d,  $J = 13.3$  Hz, 1H).  $^{13}\text{C NMR}$  (125 MHz,  $\text{CDCl}_3$ )  $\delta$  180.9, 152.7, 148.1, 142.3, 141.2, 137.4, 136.2, 134.4, 131.1, 130.6, 129.4, 128.9, 128.8, 128.4, 127.6, 127.5, 127.1, 126.6, 123.1, 115.5, 110.5, 108.1, 102.4, 101.3, 59.0, 44.1, 40.4, 33.3. **HRMS (ESI) m/z:**  $[\text{M}+\text{H}]^+$  calcd. for  $\text{C}_{30}\text{H}_{25}\text{BrNO}_4$ : 542.0961, found: 542.0940.

**1-benzyl-6'H,12'H-spiro[indoline-3,13'-(7,11)(metheno)[1,3]dioxolo[4',5':4,5]benzo[1,2-b][1]oxacycloundecin]-2-one (11a)**

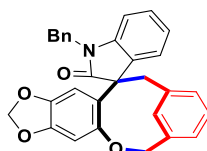

Flash column chromatography on a silica gel (ethyl acetate: petroleum ether, 1:20) afforded the product (3.7 mg, 8% yield) a faint yellow oil.

$^1\text{H NMR}$  (500 MHz,  $\text{CDCl}_3$ )  $\delta$  7.38 (s, 1H), 7.33 (d,  $J = 7.7$  Hz, 1H), 7.24 (t,  $J = 7.6$  Hz, 1H), 7.17 – 7.08 (m, 6H), 7.03 (dd,  $J = 7.3, 0.8$  Hz, 1H), 6.96 – 6.84 (m, 3H), 6.48 (d,  $J = 7.8$  Hz, 1H), 6.38 (d,  $J = 2.5$  Hz, 1H), 5.88 (dd,  $J = 4.0, 1.4$  Hz, 2H), 4.72 (d,  $J = 15.8$  Hz, 1H), 4.52 (q,  $J = 11.3$  Hz, 2H), 4.38 (dd,  $J = 22.3, 10.3$  Hz, 2H), 3.65 (d,  $J = 15.8$  Hz, 1H).  $^{13}\text{C NMR}$  (125 MHz,  $\text{CDCl}_3$ )  $\delta$  177.6, 149.9, 148.1, 143.4, 141.8, 138.1, 136.7, 135.8, 130.8, 129.4, 129.1, 129.0, 128.7, 128.4, 128.2, 127.5, 127.3, 124.1, 122.9, 121.6, 109.5, 107.2, 101.5, 95.9, 75.9, 70.7, 43.1, 33.1. **HRMS (ESI) m/z:**  $[\text{M}+\text{H}]^+$  calcd. for  $\text{C}_{30}\text{H}_{24}\text{NO}_4$ : 462.1700, found: 462.1677.

**1-benzyl-3-(2-(bromomethyl)benzyl)-3-(6-hydroxybenzo[d][1,3]dioxol-5-yl)indolin-2-one (12a)**

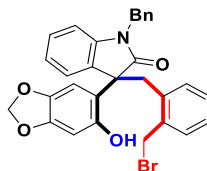

Flash column chromatography on a silica gel (ethyl acetate: petroleum ether, 1:20) afforded the product (49.8 mg, 92% yield) a faint yellow solid.

$^1\text{H NMR}$  (500 MHz,  $\text{CDCl}_3$ )  $\delta$  10.64 (s, 1H), 7.28 (d,  $J = 3.6$  Hz, 1H), 7.27 – 7.25 (m, 1H), 7.25 – 7.22 (m, 3H), 7.21 – 7.17 (m, 1H), 7.15 (td,  $J = 7.6, 0.9$  Hz, 1H), 7.04 (dd,  $J = 7.5, 0.7$  Hz, 1H), 6.96 (td,  $J = 7.6, 1.4$  Hz, 1H), 6.82 (dd,  $J = 7.3, 1.9$  Hz, 2H), 6.75 (s, 1H), 6.69 (d,  $J = 7.8$  Hz, 1H), 6.59 (d,  $J = 6.1$  Hz, 2H), 5.91 (dd,  $J = 29.7, 1.4$  Hz, 2H), 5.05 (d,  $J = 15.9$  Hz, 1H), 4.60 (d,  $J = 15.9$  Hz, 1H), 4.34 (d,  $J = 10.5$  Hz, 1H), 4.21 (d,  $J = 10.5$  Hz, 1H), 4.05 (d,  $J = 14.2$  Hz, 1H), 3.86 (d,  $J = 14.2$  Hz, 1H).  $^{13}\text{C NMR}$  (125 MHz,  $\text{CDCl}_3$ )

$\delta$  181.3, 152.7, 148.2, 142.2, 141.3, 137.5, 134.8, 134.4, 131.2, 130.7, 129.4, 129.0, 128.9, 128.5, 127.7, 127.6, 127.2, 126.6, 122.9, 115.3, 110.5, 108.3, 102.5, 101.3, 58.3, 44.1, 35.9, 32.1. **HRMS (ESI) m/z:** [M+H]<sup>+</sup> calcd. for C<sub>30</sub>H<sub>25</sub>BrNO<sub>4</sub>: 542.0961, found: 542.0940.

**Reference:** Shi, H.; Wang, L.; Li, S.-S.; Liu, Y.; Xu, L. *Org. Chem. Front.* **2020**, *7*, 747.

## 5. Crystal Structures and Data

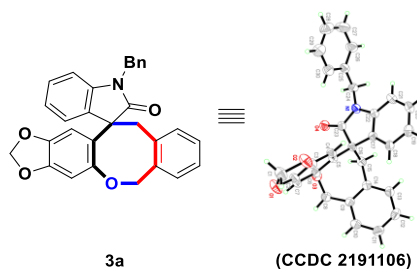

Table S1. Crystal data and structure refinement for **3a**.

|                                   |                                                 |                        |
|-----------------------------------|-------------------------------------------------|------------------------|
| Identification code               | <b>3a</b>                                       |                        |
| Empirical formula                 | C <sub>30</sub> H <sub>23</sub> NO <sub>4</sub> |                        |
| Formula weight                    | 461.49                                          |                        |
| Temperature                       | 293(2) K                                        |                        |
| Wavelength                        | 1.54184 Å                                       |                        |
| Crystal system, space group       | monoclinic, P21/c                               |                        |
| Unit cell dimensions              | a = 8.1555(5) Å                                 | alpha = 90 deg.        |
|                                   | b = 27.2024(14) Å                               | beta = 108.457(6) deg. |
|                                   | c = 10.8788(6) Å                                | gamma = 90 deg.        |
| Volume                            | 2289.3(2) Å <sup>3</sup>                        |                        |
| Z, Calculated density             | 4, 1.339 Mg/m <sup>3</sup>                      |                        |
| Absorption coefficient            | 0.717 mm <sup>-1</sup>                          |                        |
| F(000)                            | 968                                             |                        |
| Crystal size                      | 0.14 x 0.12 x 0.12 mm                           |                        |
| Theta range for data collection   | 4.58 to 67.24 deg.                              |                        |
| Limiting indices                  | -9 ≤ h ≤ 9, -32 ≤ k ≤ 27, -12 ≤ l ≤ 13          |                        |
| Reflections collected / unique    | 8125 / 4101 [R(int) = 0.0429]                   |                        |
| Completeness to theta = 67.24     | 99.9 %                                          |                        |
| Max. and min. transmission        | 0.9189 and 0.9063                               |                        |
| Refinement method                 | Full-matrix least-squares on F <sup>2</sup>     |                        |
| Data / restraints / parameters    | 4101 / 0 / 316                                  |                        |
| Goodness-of-fit on F <sup>2</sup> | 1.039                                           |                        |
| Final R indices [I > 2σ(I)]       | R1 = 0.0616, wR2 = 0.1411                       |                        |
| R indices (all data)              | R1 = 0.1037, wR2 = 0.1717                       |                        |
| Largest diff. peak and hole       | 0.254 and -0.201 e.Å <sup>-3</sup>              |                        |

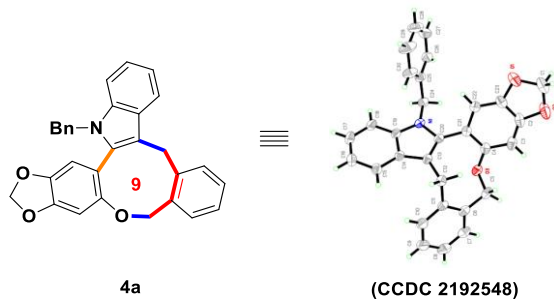

Table S2. Crystal data and structure refinement for **4a**.

|                                   |                                                                                                                                           |
|-----------------------------------|-------------------------------------------------------------------------------------------------------------------------------------------|
| Identification code               | <b>4a</b>                                                                                                                                 |
| Empirical formula                 | C <sub>30</sub> H <sub>23</sub> NO <sub>3</sub>                                                                                           |
| Formula weight                    | 445.49                                                                                                                                    |
| Temperature                       | 293(2) K                                                                                                                                  |
| Wavelength                        | 1.54184 Å                                                                                                                                 |
| Crystal system, space group       | Triclinic, P-1                                                                                                                            |
| Unit cell dimensions              | a = 10.0716(8) Å      alpha = 78.010(8) deg.<br>b = 11.1150(10) Å    beta = 73.634(8) deg.<br>c = 11.1165(12) Å    gamma = 71.600(8) deg. |
| Volume                            | 1123.3(2) Å <sup>3</sup>                                                                                                                  |
| Z, Calculated density             | 2, 1.317 Mg/m <sup>3</sup>                                                                                                                |
| Absorption coefficient            | 0.676 mm <sup>-1</sup>                                                                                                                    |
| F(000)                            | 468                                                                                                                                       |
| Crystal size                      | 0.140 x 0.120 x 0.120 mm                                                                                                                  |
| Theta range for data collection   | 4.181 to 67.243 deg.                                                                                                                      |
| Limiting indices                  | -12 ≤ h ≤ 8, -13 ≤ k ≤ 11, -13 ≤ l ≤ 12                                                                                                   |
| Reflections collected / unique    | 6993 / 4012 [R(int) = 0.0302]                                                                                                             |
| Completeness to theta = 67.243    | 99.7 %                                                                                                                                    |
| Refinement method                 | Full-matrix least-squares on F <sup>2</sup>                                                                                               |
| Data / restraints / parameters    | 4012 / 0 / 308                                                                                                                            |
| Goodness-of-fit on F <sup>2</sup> | 1.052                                                                                                                                     |
| Final R indices [I > 2σ(I)]       | R1 = 0.0446, wR2 = 0.1004                                                                                                                 |
| R indices (all data)              | R1 = 0.0714, wR2 = 0.1196                                                                                                                 |
| Extinction coefficient            | 0.0083(5)                                                                                                                                 |
| Largest diff. peak and hole       | 0.145 and -0.135 e.Å <sup>-3</sup>                                                                                                        |

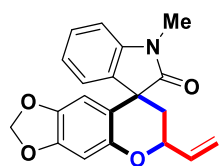

**6a**

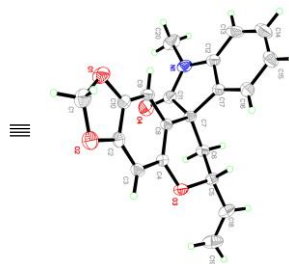

(CCDC 2190999)

Table S3. Crystal data and structure refinement for **6a**.

|                                   |                                                                                                                        |
|-----------------------------------|------------------------------------------------------------------------------------------------------------------------|
| Identification code               | <b>6a</b>                                                                                                              |
| Empirical formula                 | C <sub>20</sub> H <sub>17</sub> NO <sub>4</sub>                                                                        |
| Formula weight                    | 335.35                                                                                                                 |
| Temperature                       | 293(2) K                                                                                                               |
| Wavelength                        | 1.54184 Å                                                                                                              |
| Crystal system, space group       | Monoclinic, P2(1)/c                                                                                                    |
| Unit cell dimensions              | a = 8.1822(3) Å    alpha = 90 deg.<br>b = 23.2770(6) Å    beta = 109.551(3) deg.<br>c = 9.2073(3) Å    gamma = 90 deg. |
| Volume                            | 1652.49(9) Å <sup>3</sup>                                                                                              |
| Z, Calculated density             | 4, 1.348 Mg/m <sup>3</sup>                                                                                             |
| Absorption coefficient            | 0.774 mm <sup>-1</sup>                                                                                                 |
| F(000)                            | 704                                                                                                                    |
| Crystal size                      | 0.080 x 0.080 x 0.070 mm                                                                                               |
| Theta range for data collection   | 5.441 to 67.222 deg.                                                                                                   |
| Limiting indices                  | -9<=h<=8, -27<=k<=27, -7<=l<=11                                                                                        |
| Reflections collected / unique    | 6202 / 2941 [R(int) = 0.0233]                                                                                          |
| Completeness to theta = 67.222    | 99.7 %                                                                                                                 |
| Refinement method                 | Full-matrix least-squares on F <sup>2</sup>                                                                            |
| Data / restraints / parameters    | 2941 / 0 / 227                                                                                                         |
| Goodness-of-fit on F <sup>2</sup> | 1.056                                                                                                                  |
| Final R indices [I>2sigma(I)]     | R1 = 0.0443, wR2 = 0.1159                                                                                              |
| R indices (all data)              | R1 = 0.0529, wR2 = 0.1227                                                                                              |
| Extinction coefficient            | n/a                                                                                                                    |
| Largest diff. peak and hole       | 0.203 and -0.206 e.Å <sup>-3</sup>                                                                                     |

## 6. <sup>1</sup>H and <sup>13</sup>C NMR Spectra

### 1-benzyl-6',11'-dihydrospiro[indoline-3,12'-[1,3]dioxolo[4',5':4,5]benzo[1,2-b]benzo[f]oxocin]-2-one (3a)

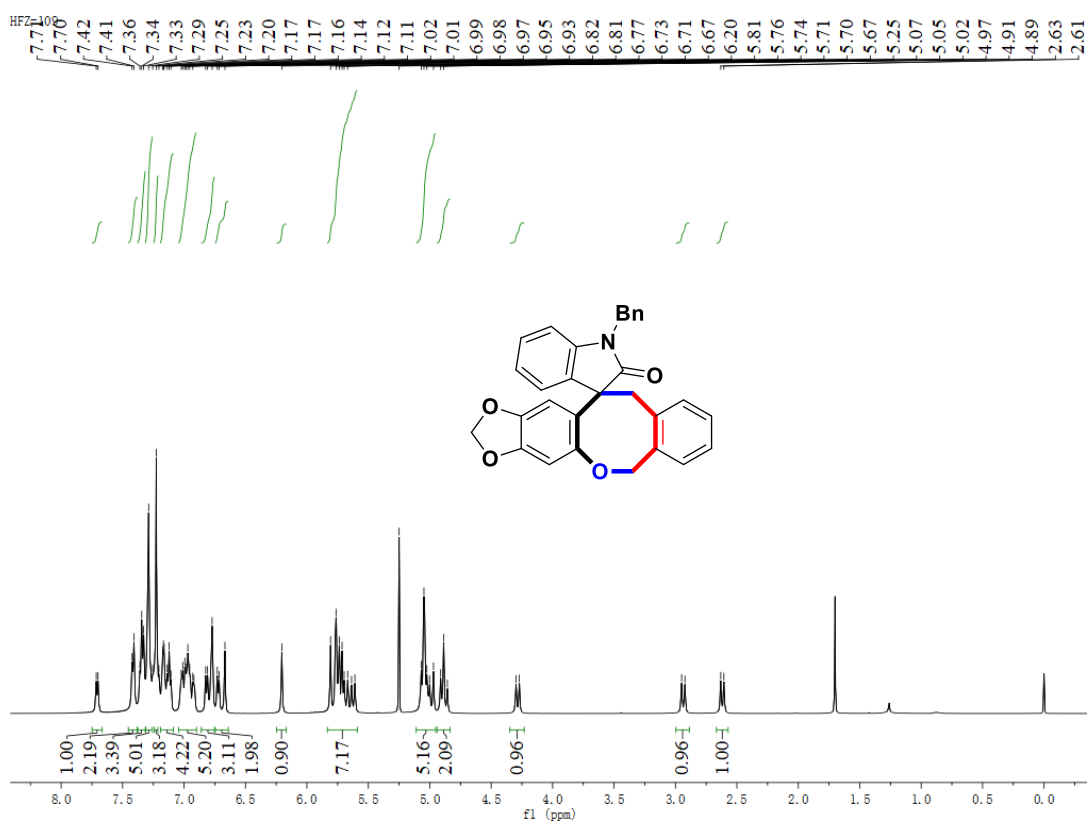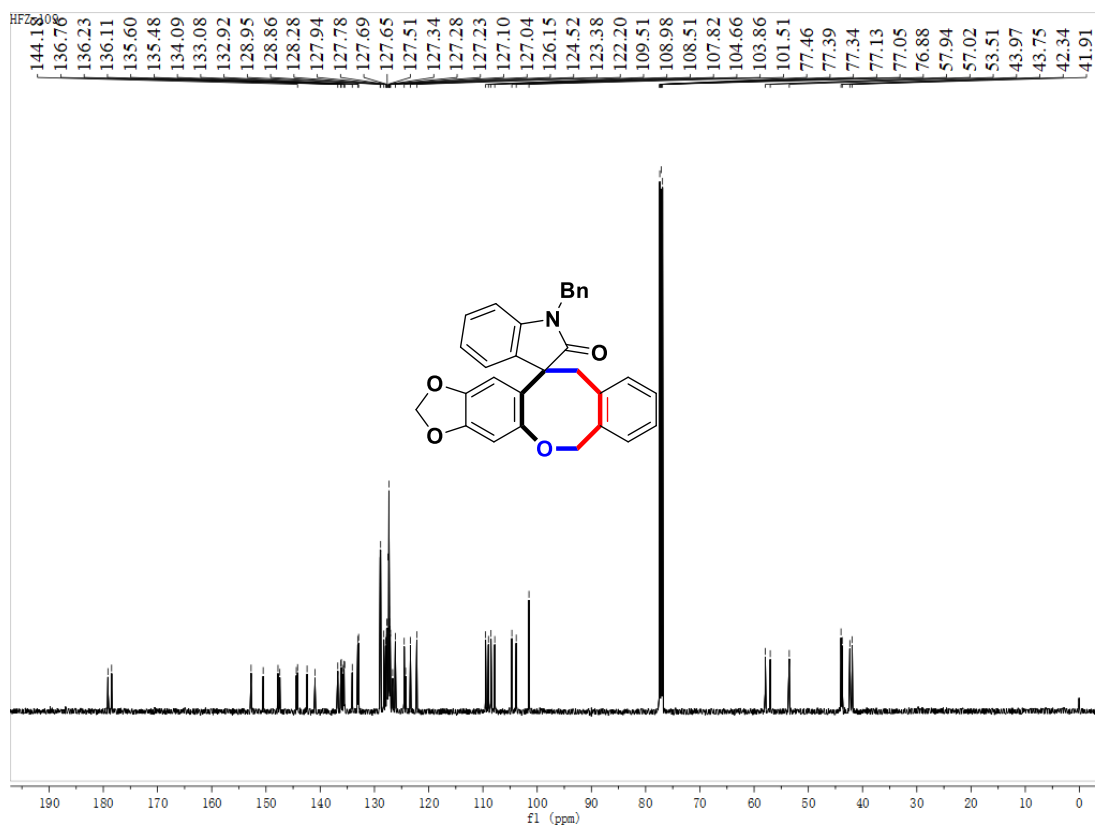



**1-methyl-6',11'-dihydrospiro[indoline-3,12'-[1,3]dioxolo[4',5':4,5]benzo[1,2-b]benzo[f]oxocin]-2-one**  
**(3b)**

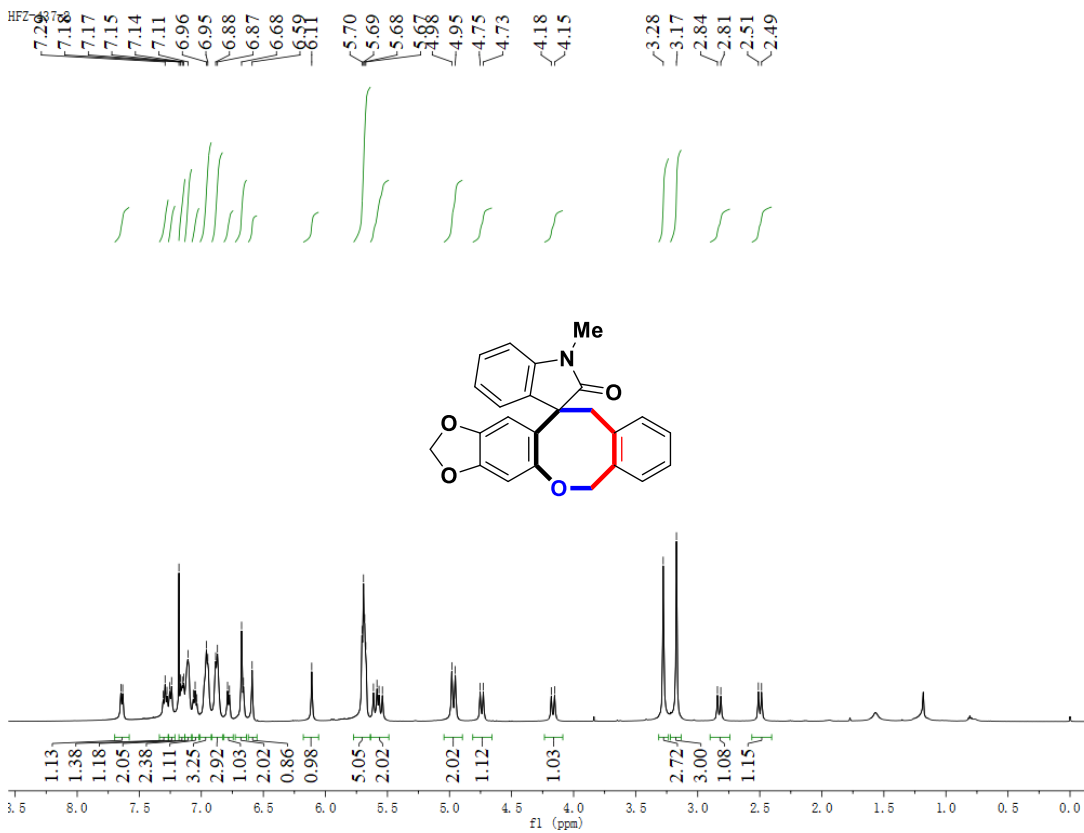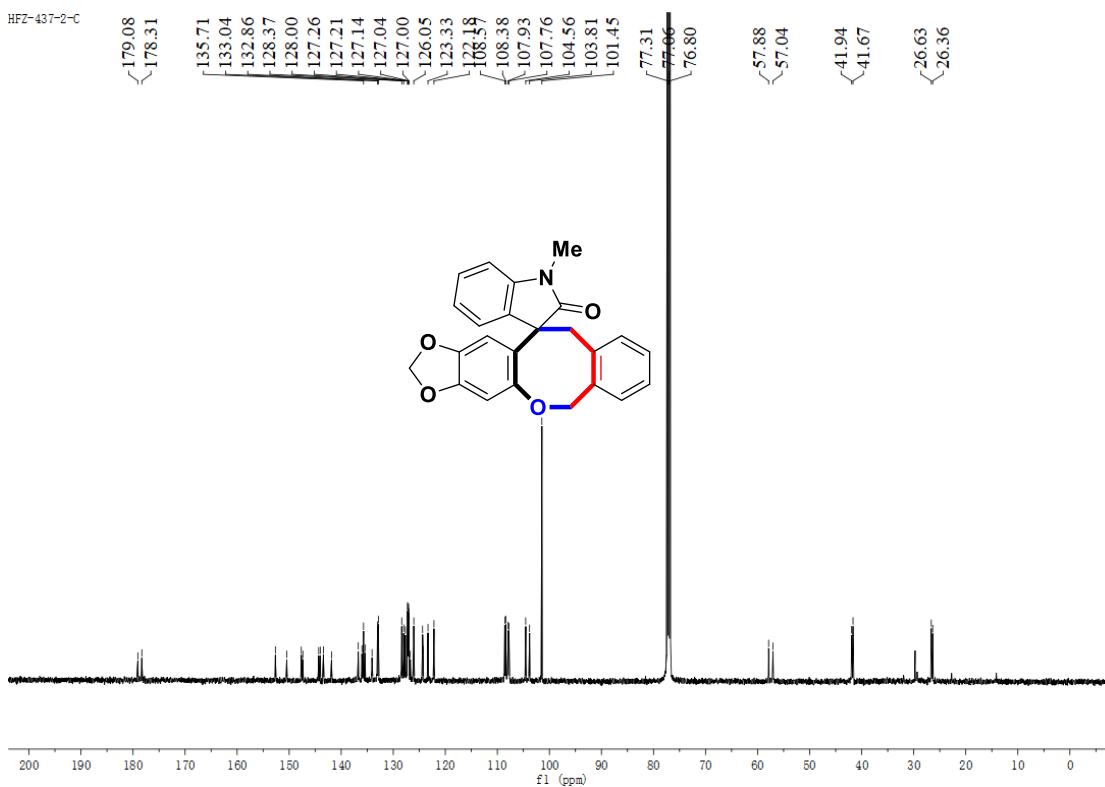

**1-methyl-6',11'-dihydrospiro[indoline-3,12'-[1,3]dioxolo[4',5':4,5]benzo[1,2-b]benzo[f]oxocin]-2-one**  
**(3c)**

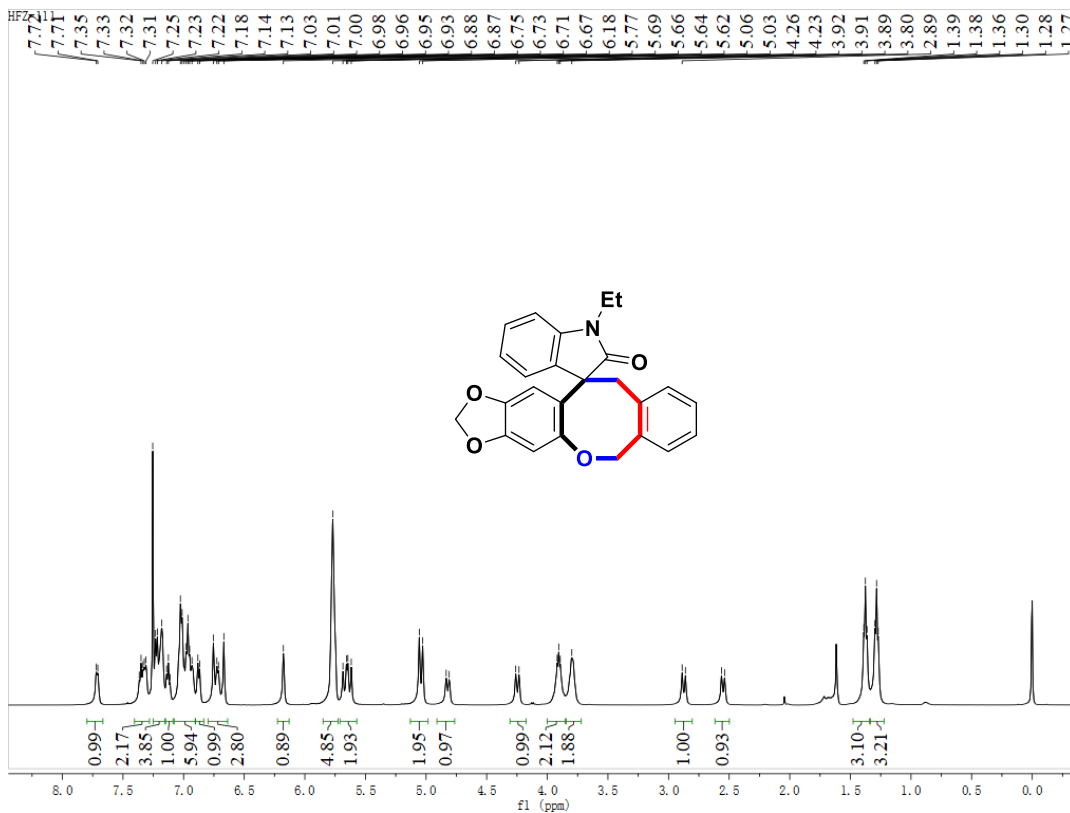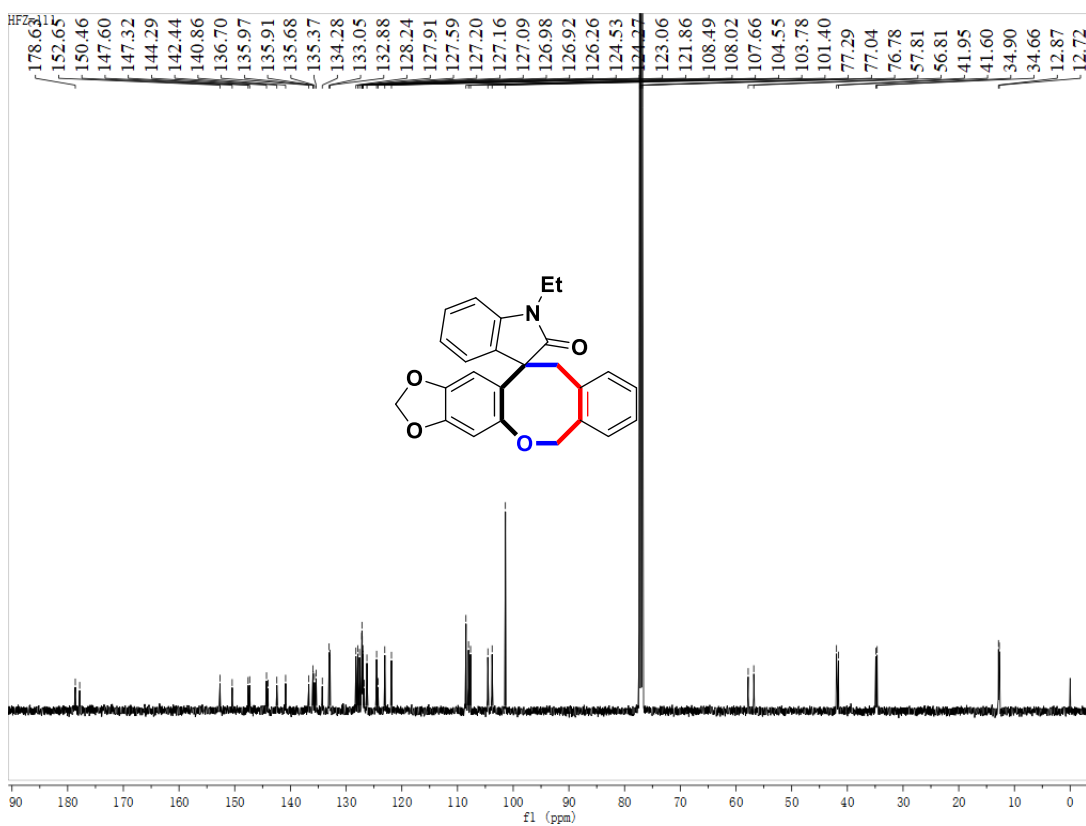

**1-(cyclopropylmethyl)-6',11'-dihydrospiro[indoline-3,12'-[1,3]dioxolo[4',5':4,5]benzo[1,2-b]benzo[f]oxocin]-2-one (3d)**

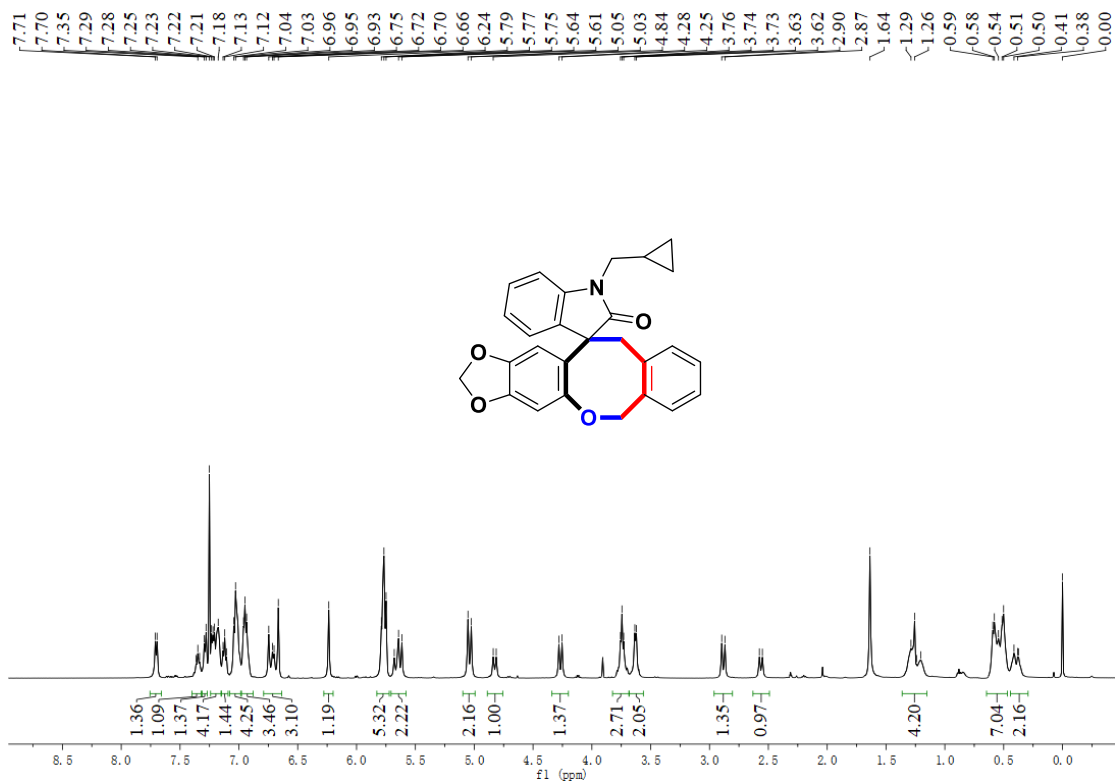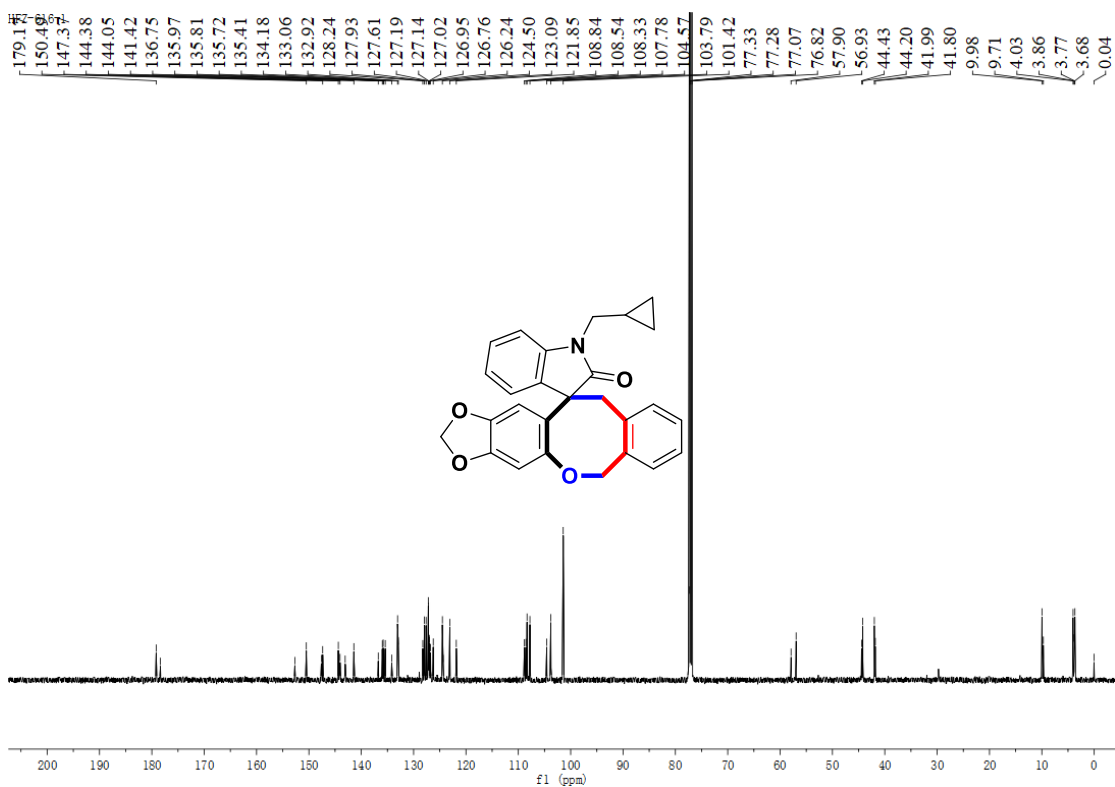

**1-allyl-6',11'-dihydrospiro[indoline-3,12'-[1,3]dioxolo[4',5':4,5]benzo[1,2-b]benzo[f]oxocin]-2-one**  
**(3e)**

HFZ-638

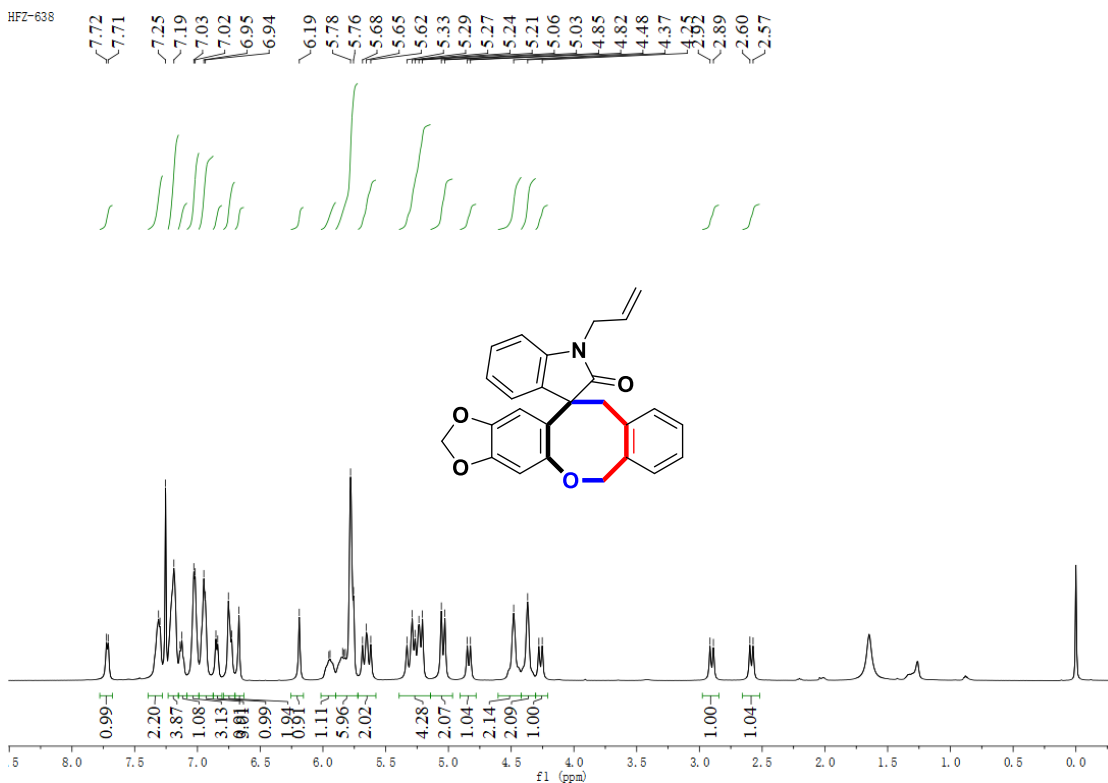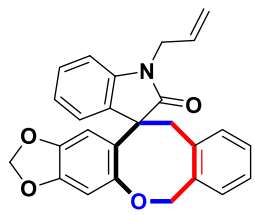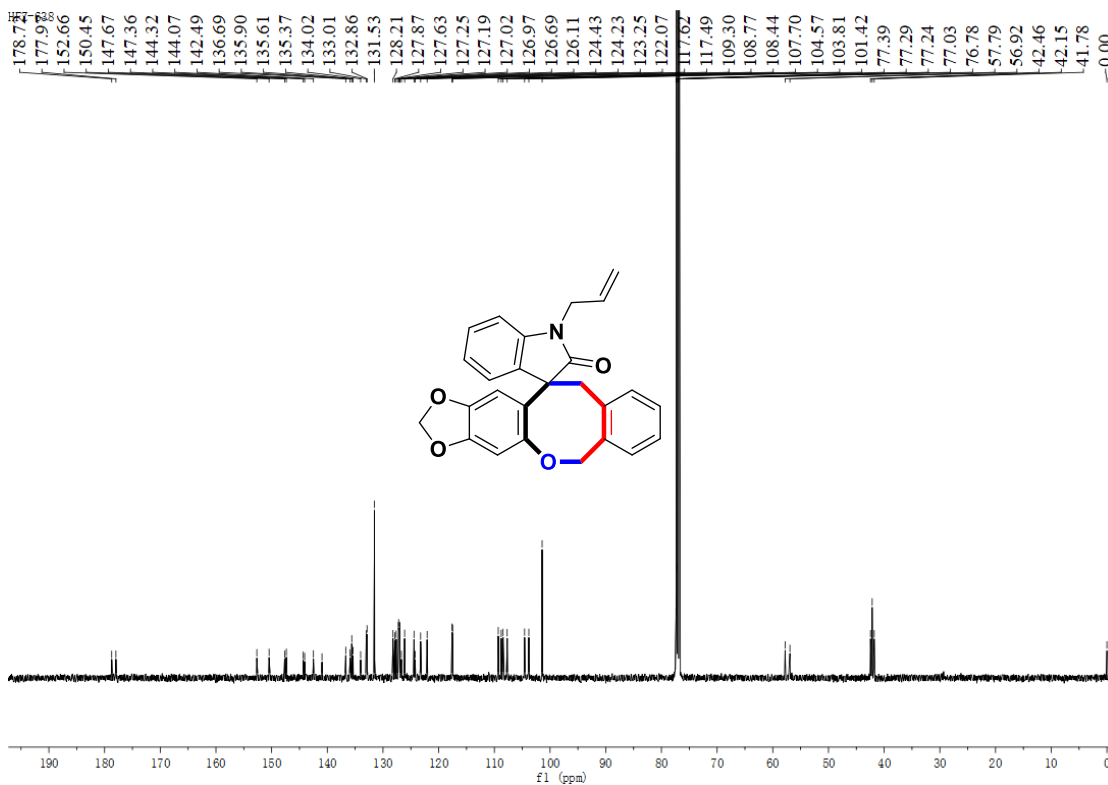

**1-(prop-2-yn-1-yl)-6',11'-dihydrospiro[indoline-3,12'-[1,3]dioxolo[4',5':4,5]benzo[1,2-b]benzo[f]oxocin]-2-one (3f)**

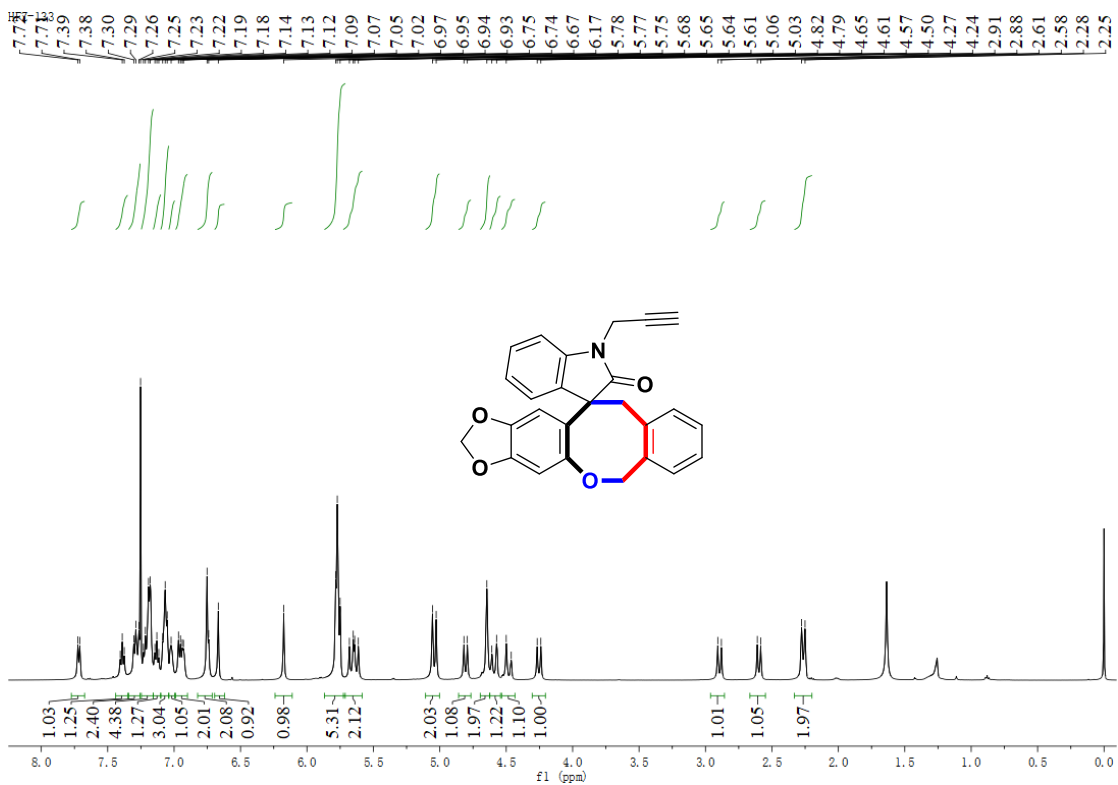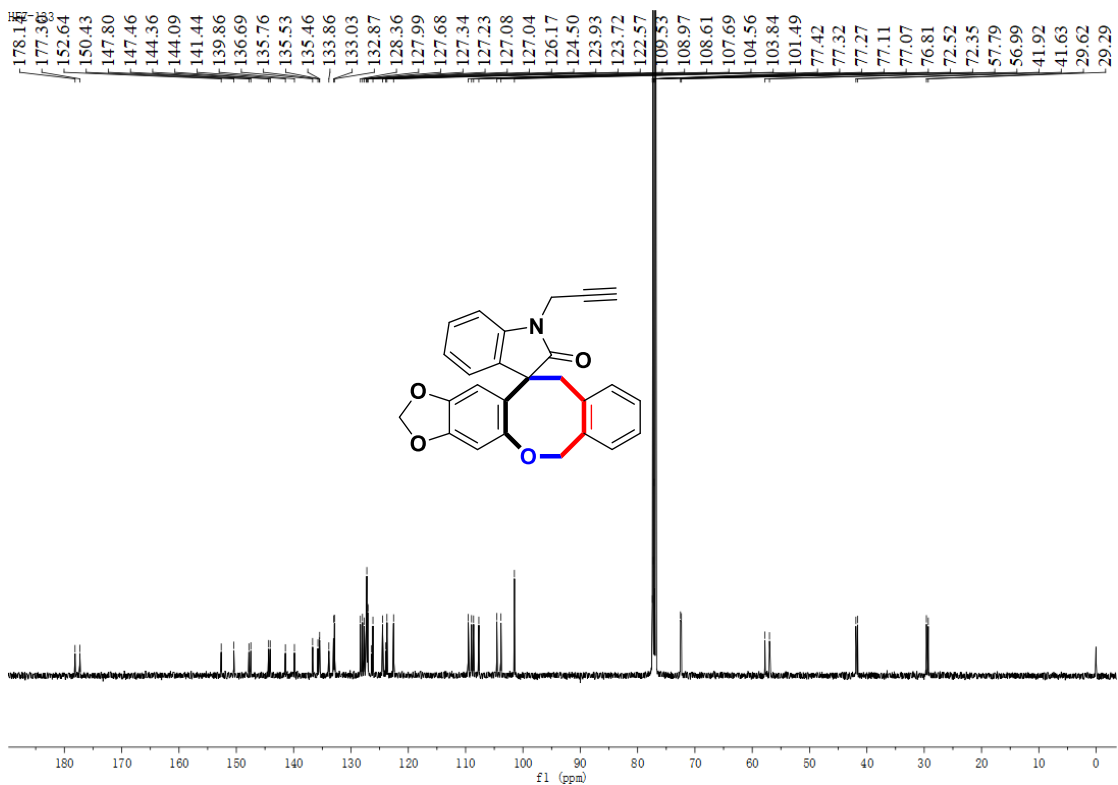

**1-benzyl-5-methyl-6',11'-dihydrospiro[indoline-3,12'-[1,3]dioxolo[4',5':4,5]benzo[1,2-b]benzo[*f*]oxocin]-2-one (3g)**

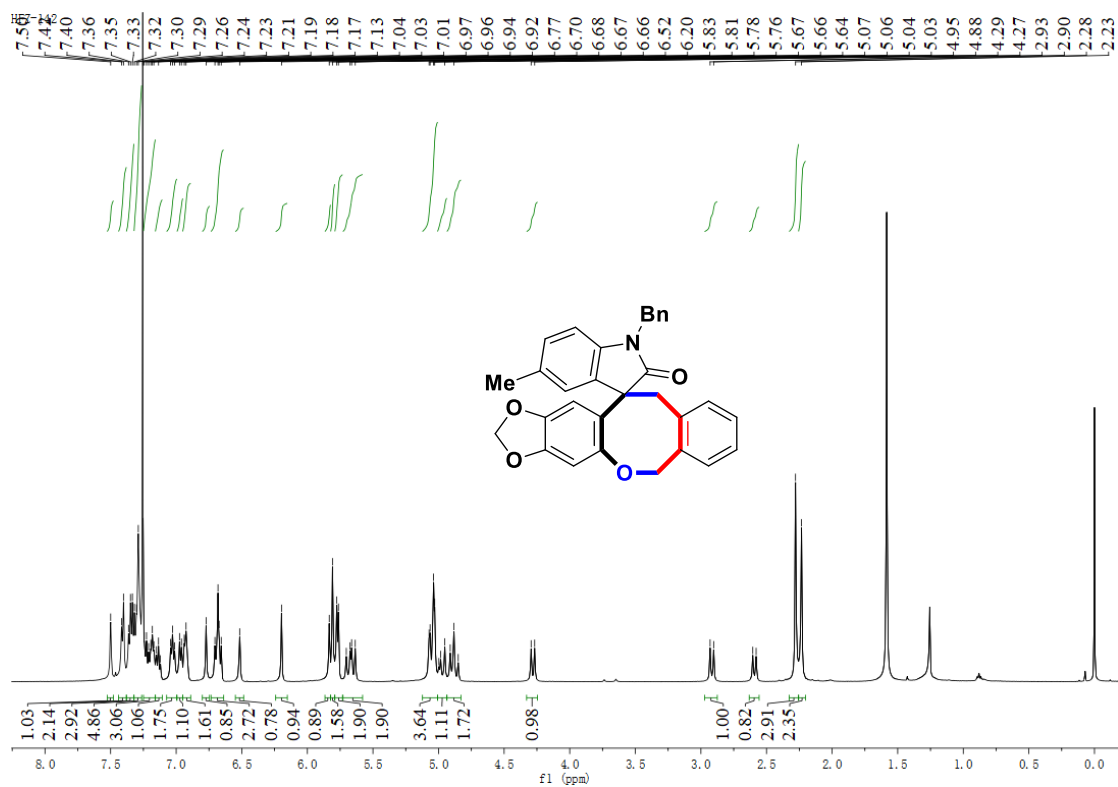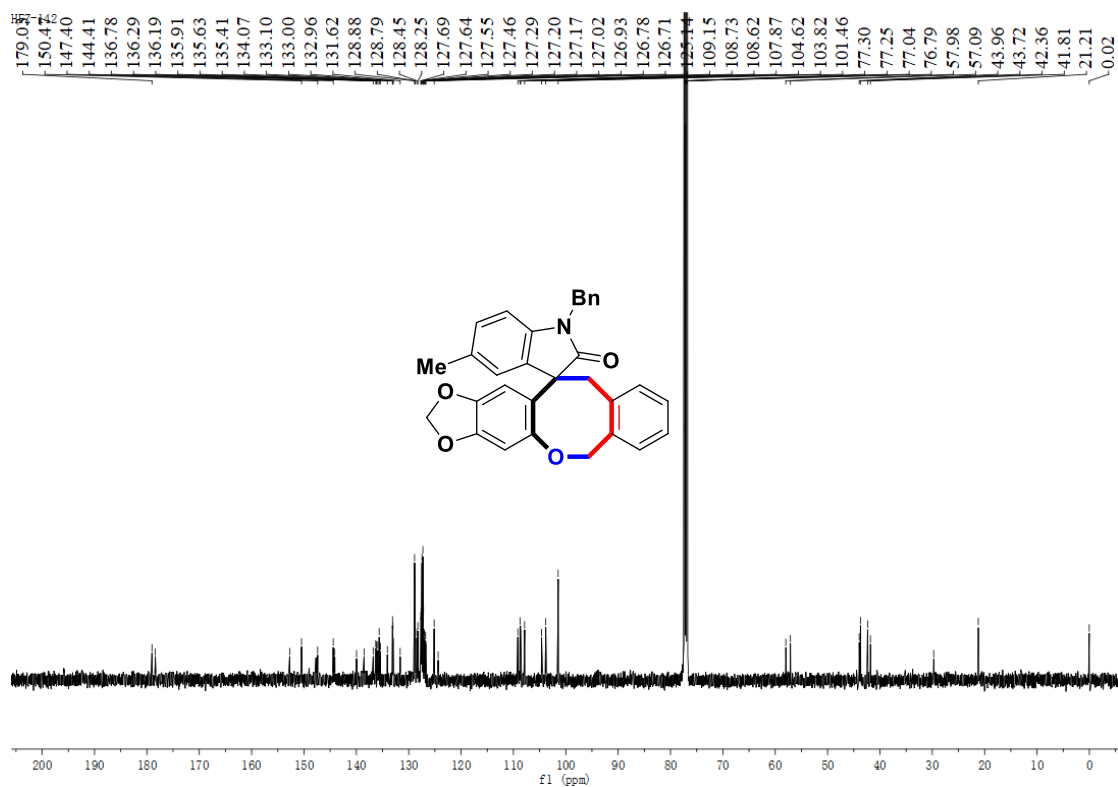

**1-benzyl-5-methoxy-6',11'-dihydrospiro[indoline-3,12'-[1,3]dioxolo[4',5':4,5]benzo[1,2-b]benzo[f]oxocin]-2-one (3h)**

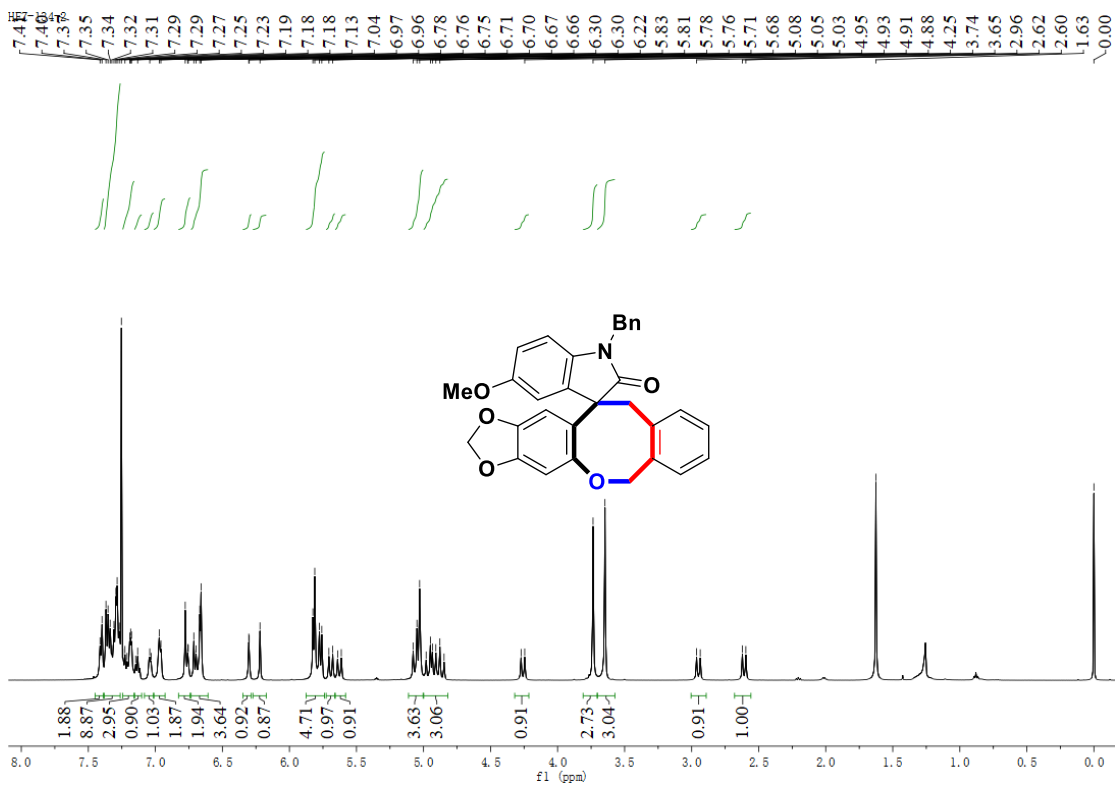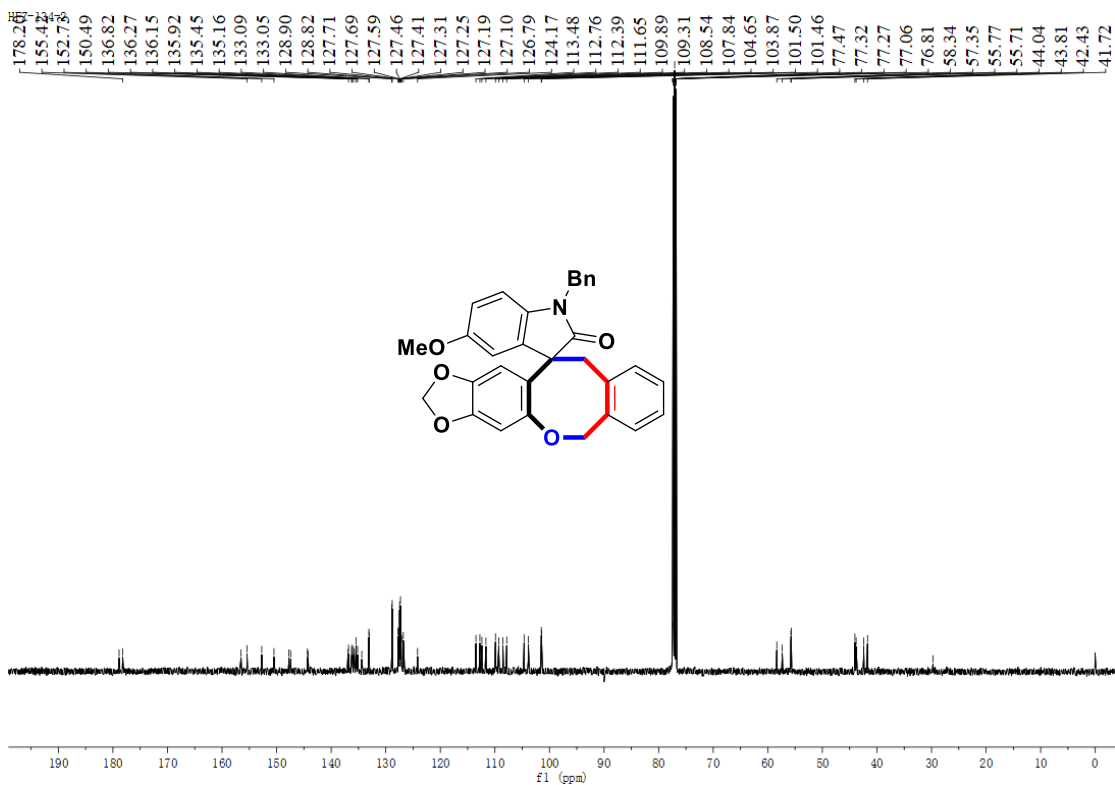

**1-benzyl-5-bromo-6',11'-dihydrospiro[indoline-3,12'-[1,3]dioxolo[4',5':4,5]benzo[1,2-b]benzo[f]oxocin]-2-one (3i)**

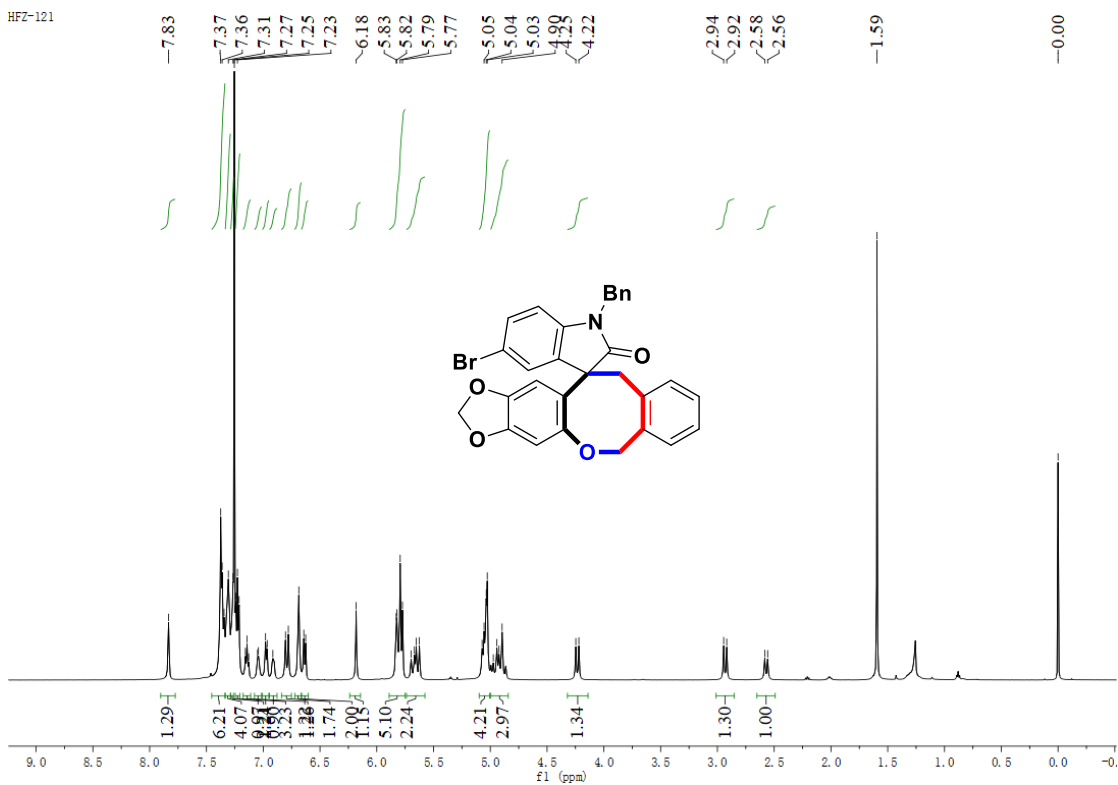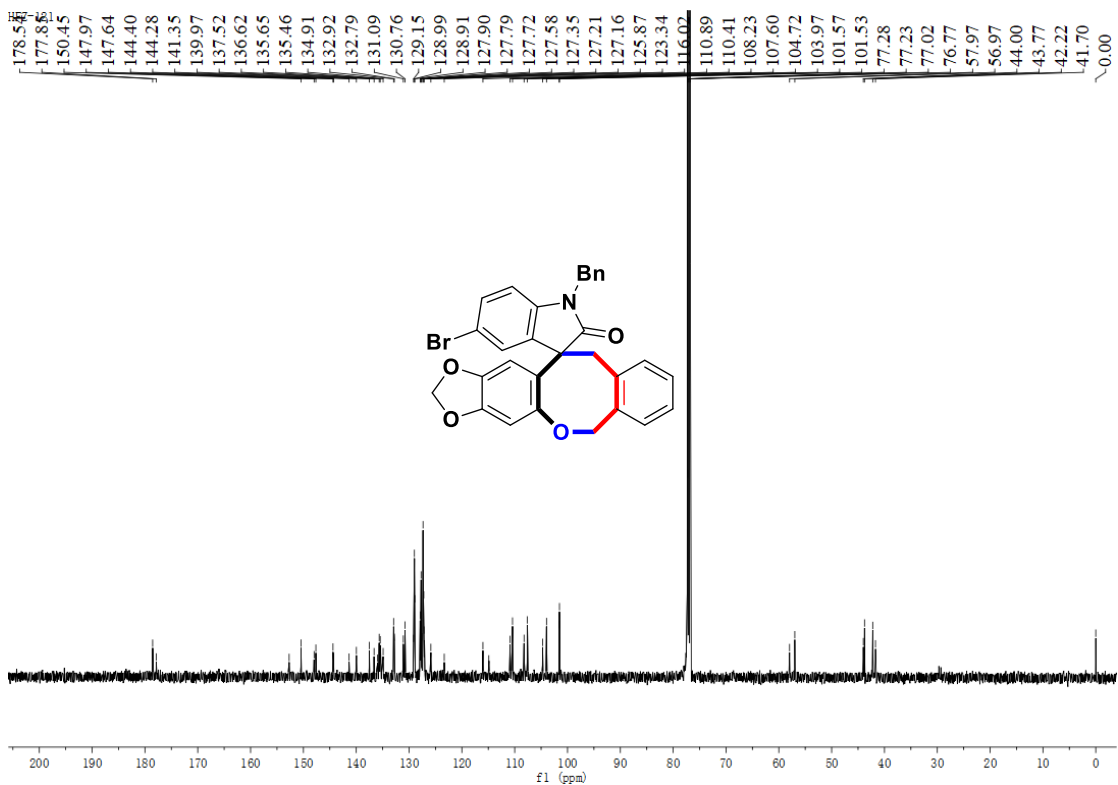



**1-benzyl-7-methyl-6',11'-dihydrospiro[indoline-3,12'-[1,3]dioxolo[4',5':4,5]benzo[1,2-b]benzo[f]oxocin]-2-one (3j)**

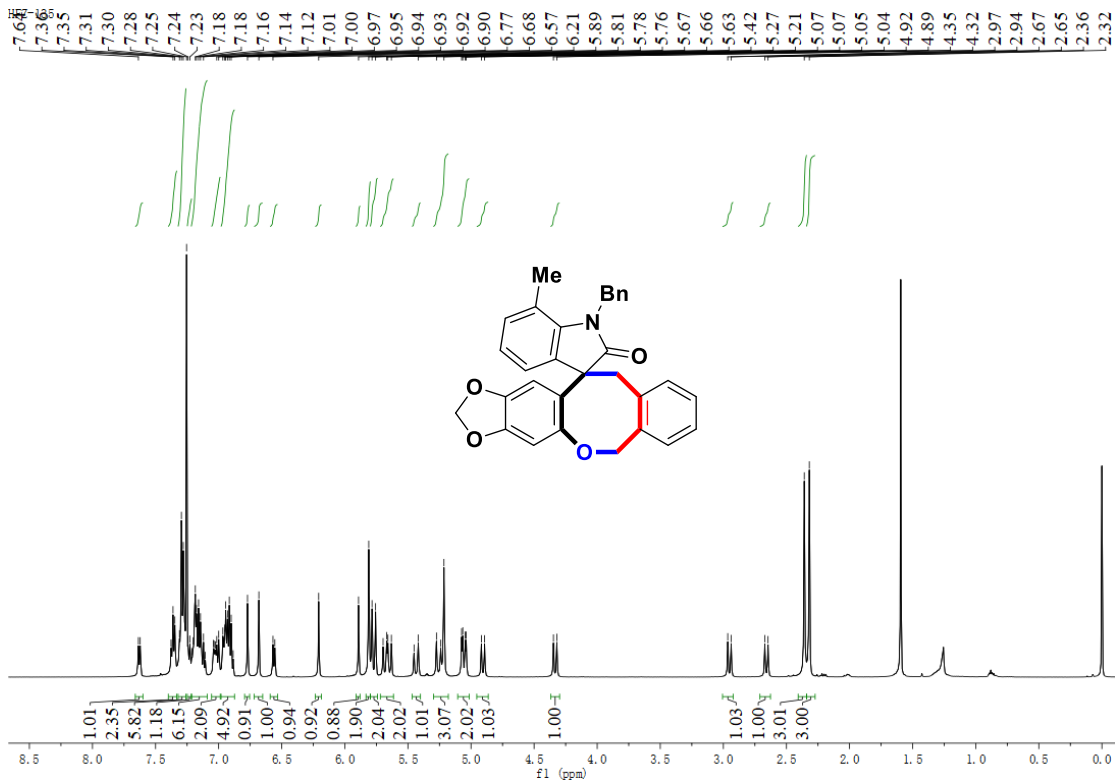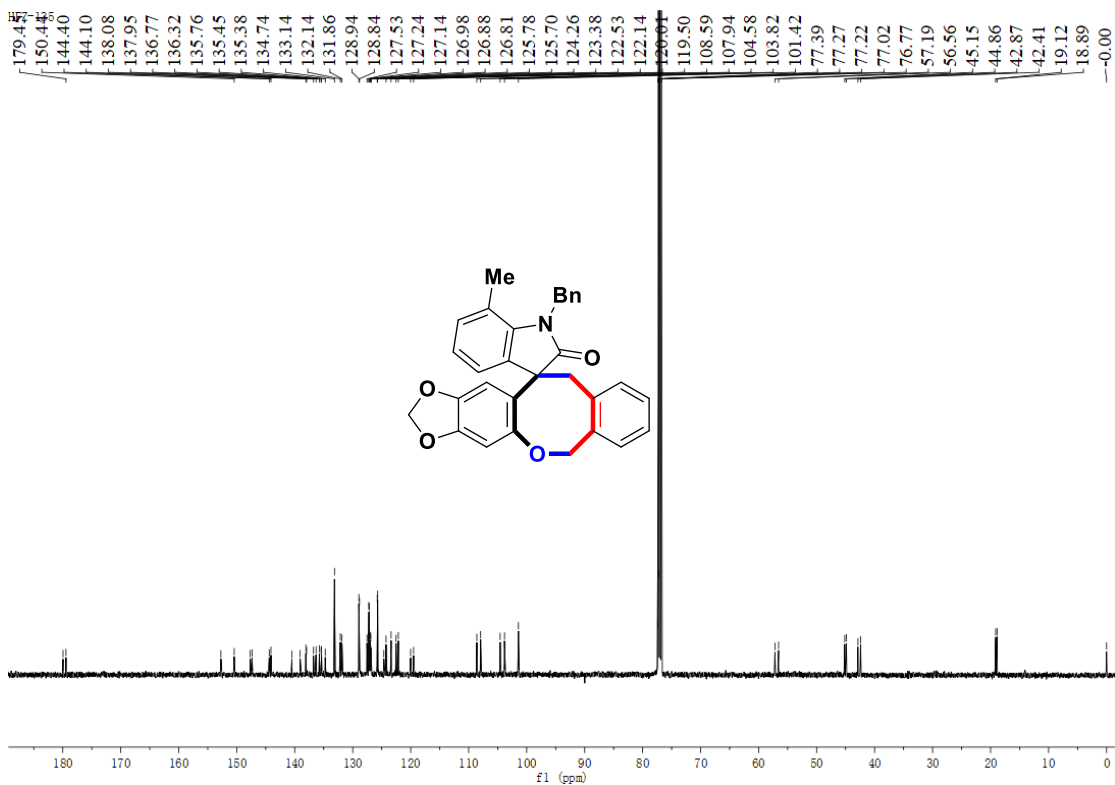

**1-benzyl-7-fluoro-6',11'-dihydrospiro[indoline-3,12'-[1,3]dioxolo[4',5':4,5]benzo[1,2-b]benzo[f]oxocin]-2-one (3k)**

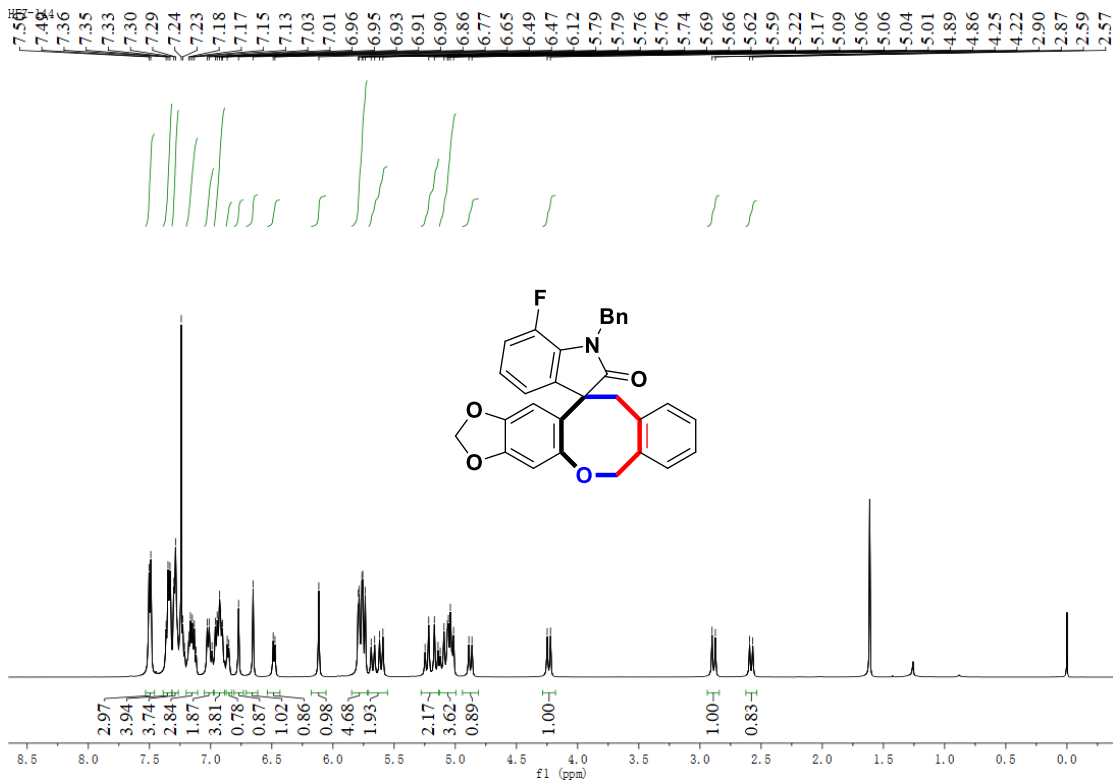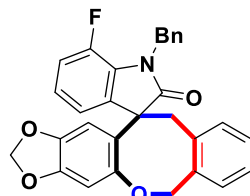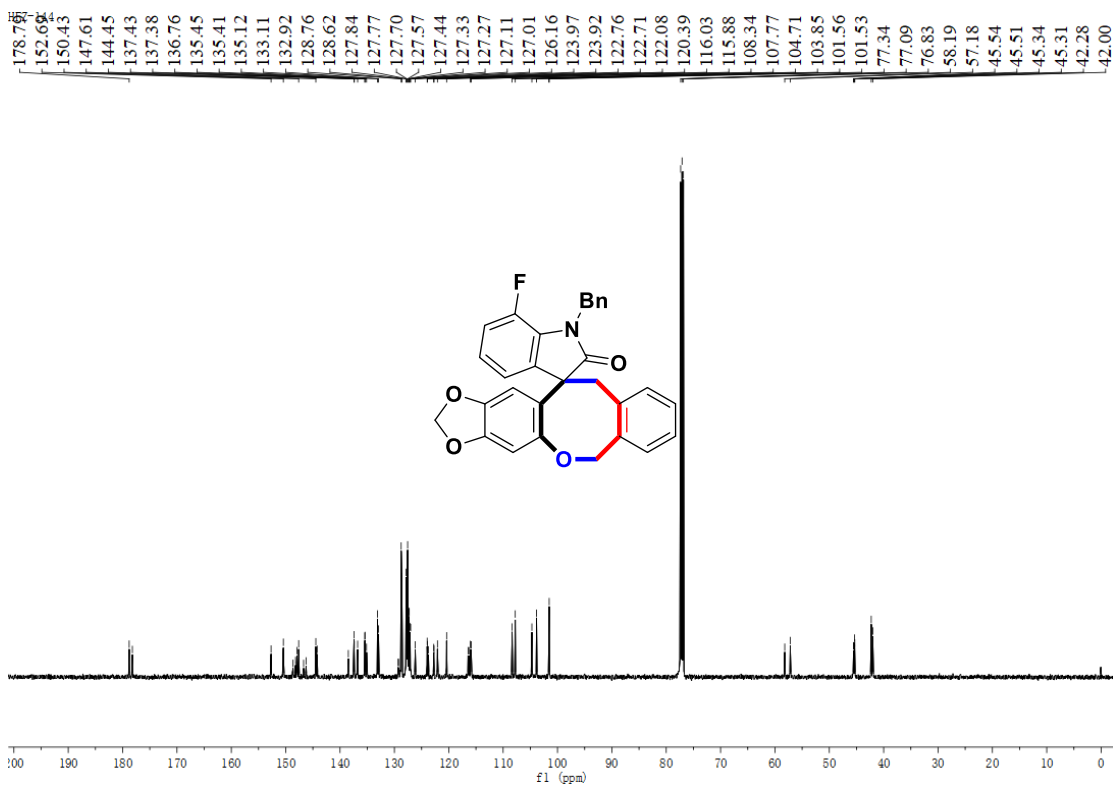

**1-benzyl-5,7-dimethyl-6',11'-dihydrospiro[indoline-3,12'-[1,3]dioxolo[4',5':4,5]benzo[1,2-b]benzo[f]loxocin]-2-one (3l)**

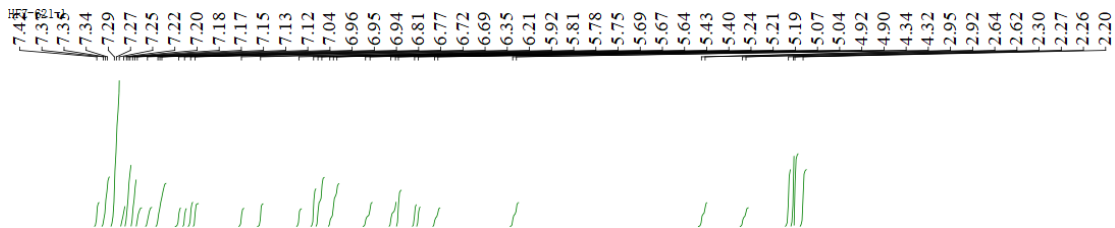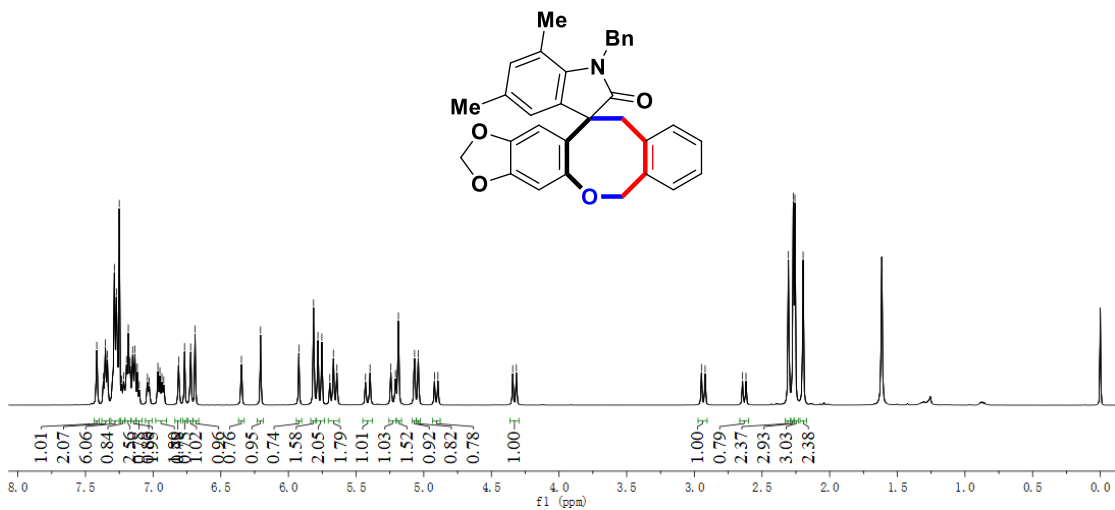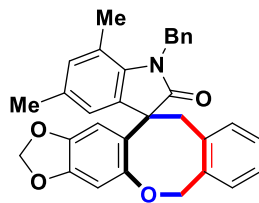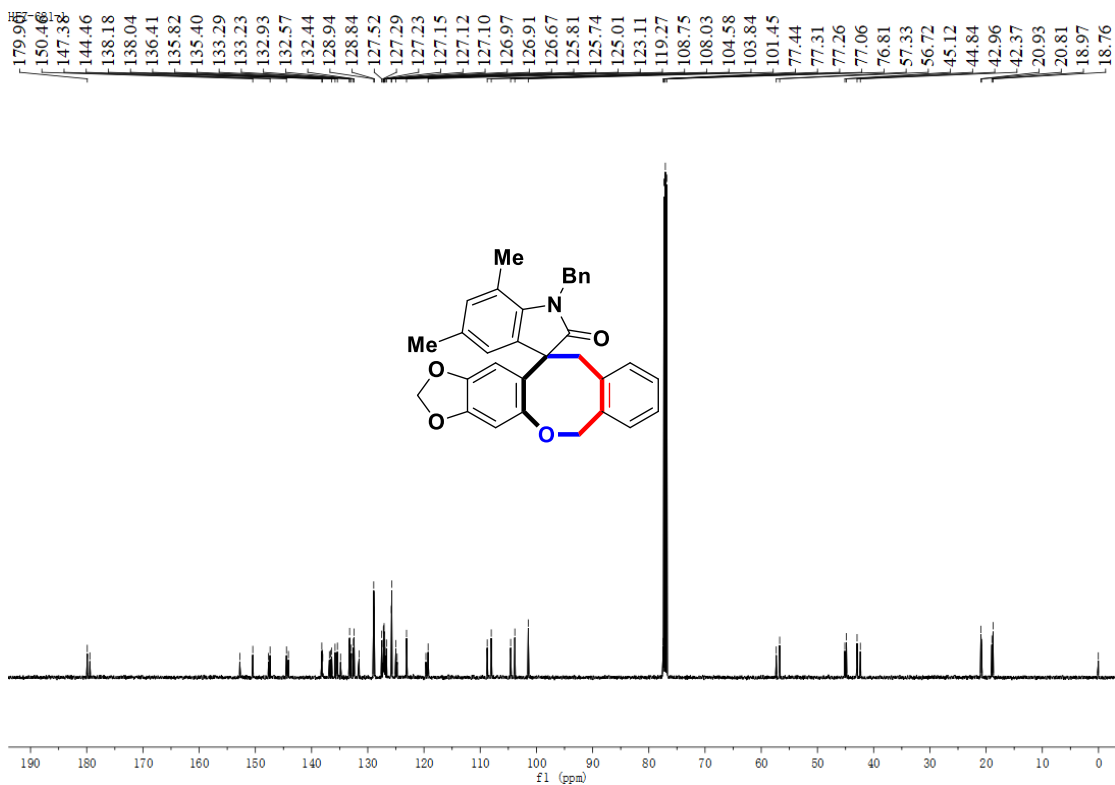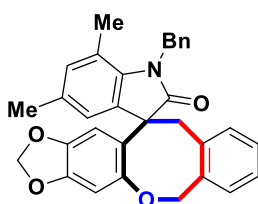

**1'-benzyl-8,13-dihydrospiro[benzo[f]naphtho[1,2-b]oxocine-7,3'-indolin]-2'-one (3m)**

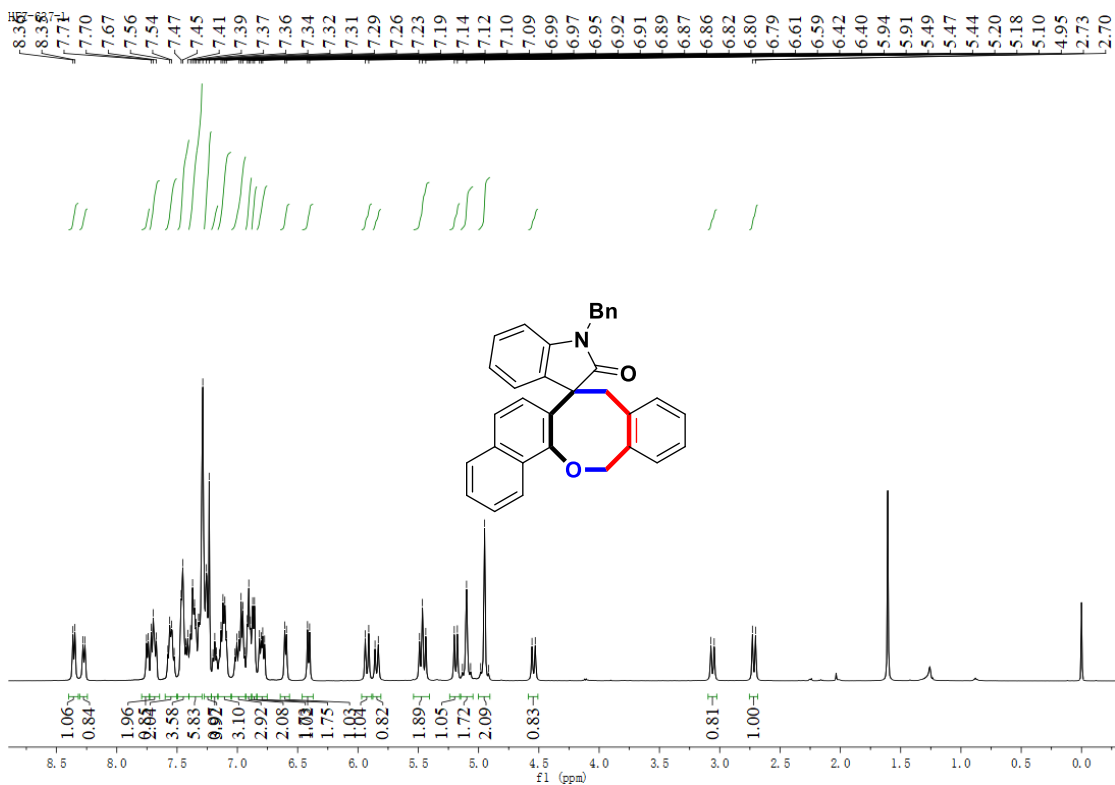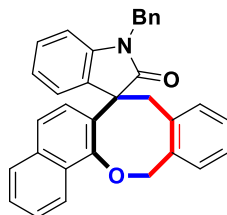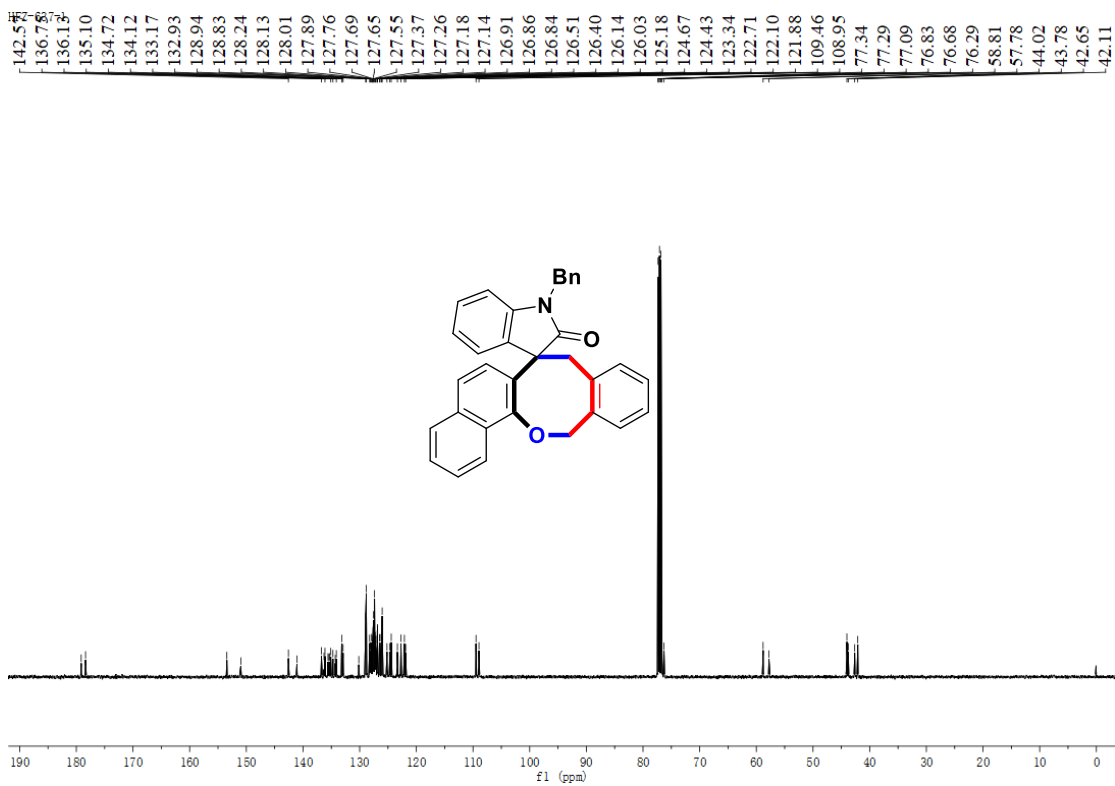

**17-benzyl-5,17-dihydro-10H-[1,3]dioxolo[4'',5'':4',5']benzo[1',2':2,3]benzo[7,8]oxonino[4,5-b]indole (4a)**

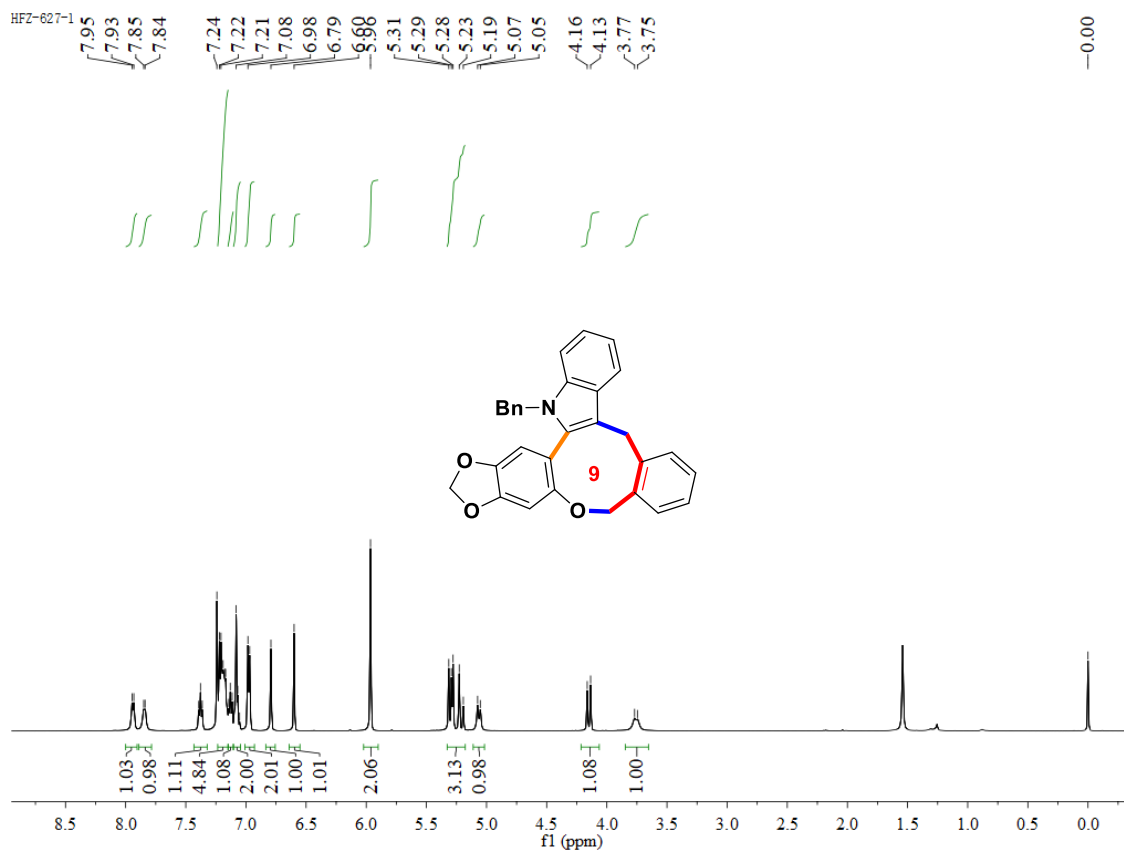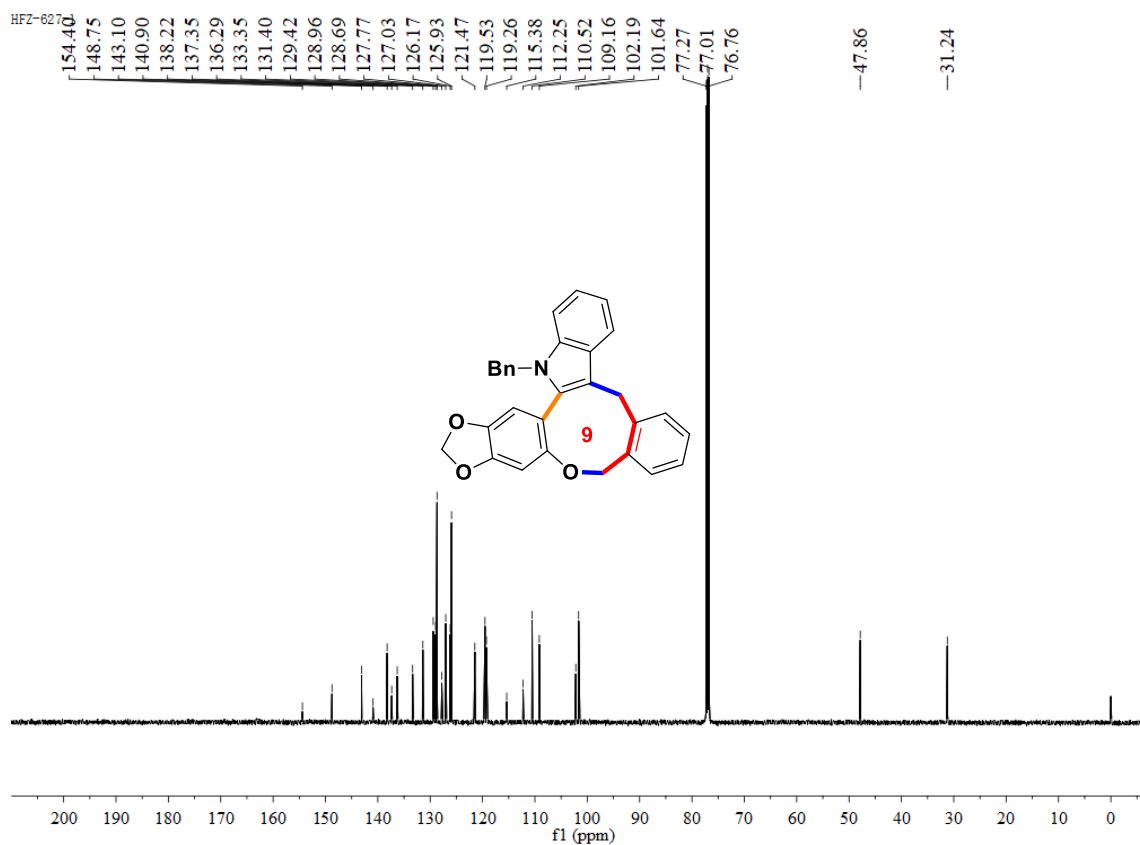

**17-(cyclopropylmethyl)-5,17-dihydro-10H-[1,3]dioxolo[4',5'':4',5']benzo[1',2':2,3]benzo[7,8]oxonino[4,5-b]indole (4b)**

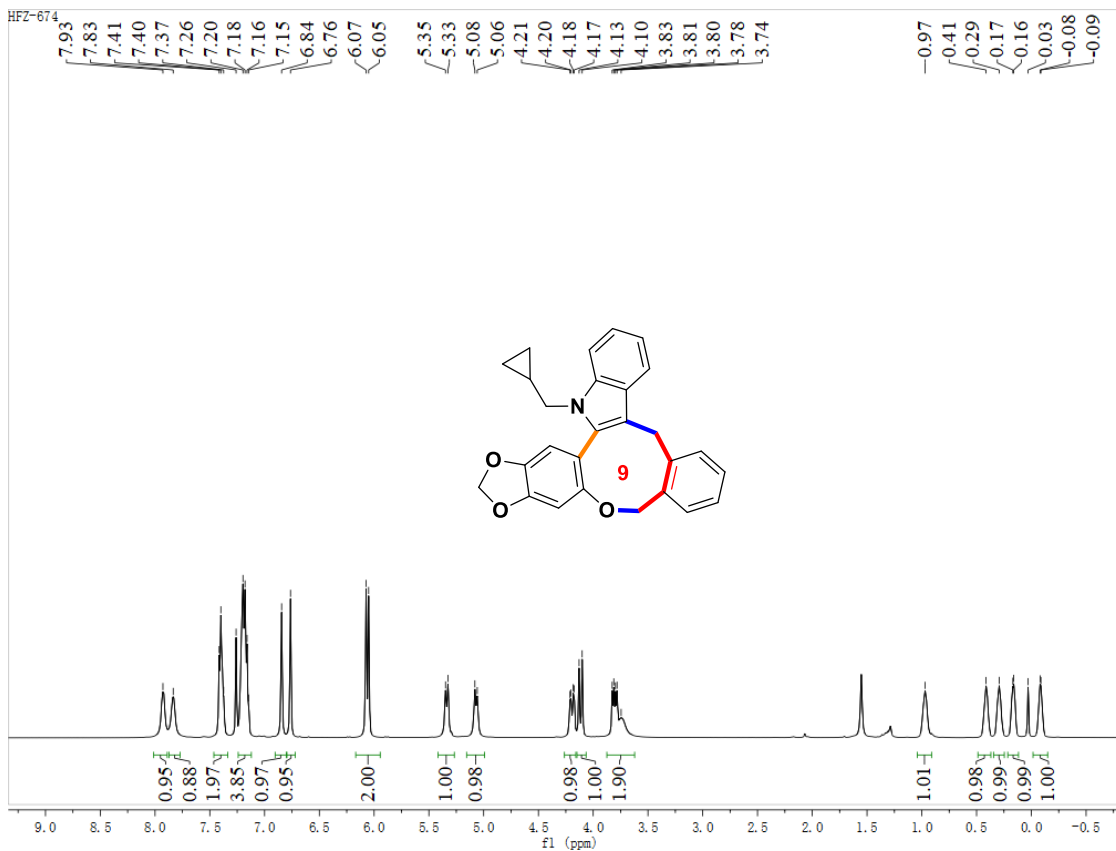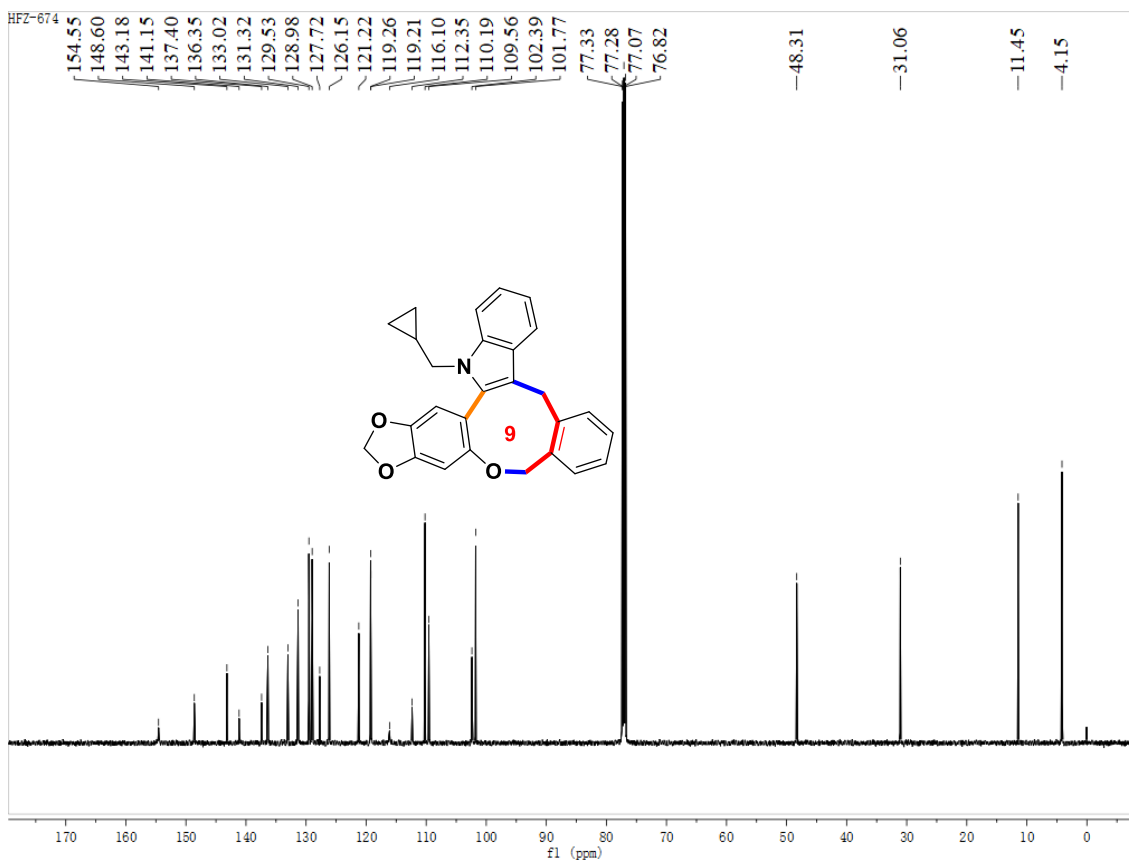

17-allyl-5,17-dihydro-10H-[1,3]dioxolo[4'',5'':4',5']benzo[1',2':2,3]benzo[7,8]oxonino[4,5-b]indole  
(4c)

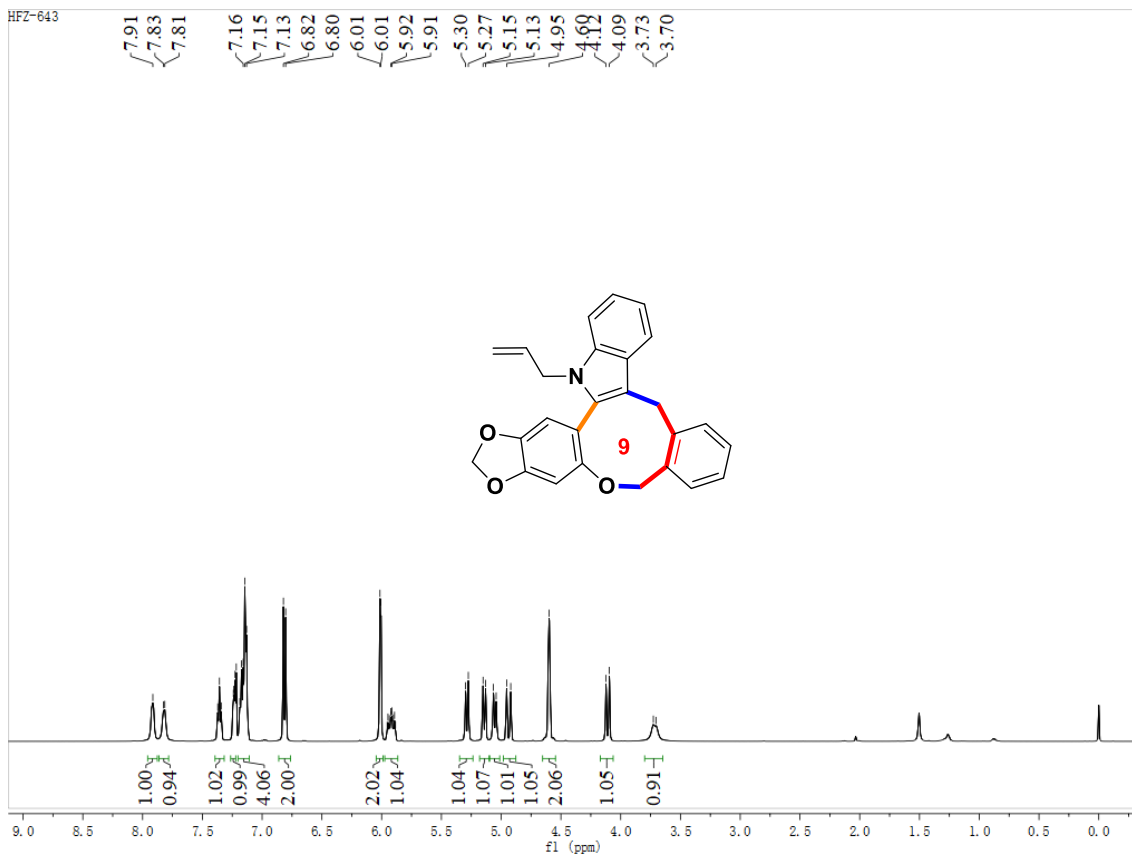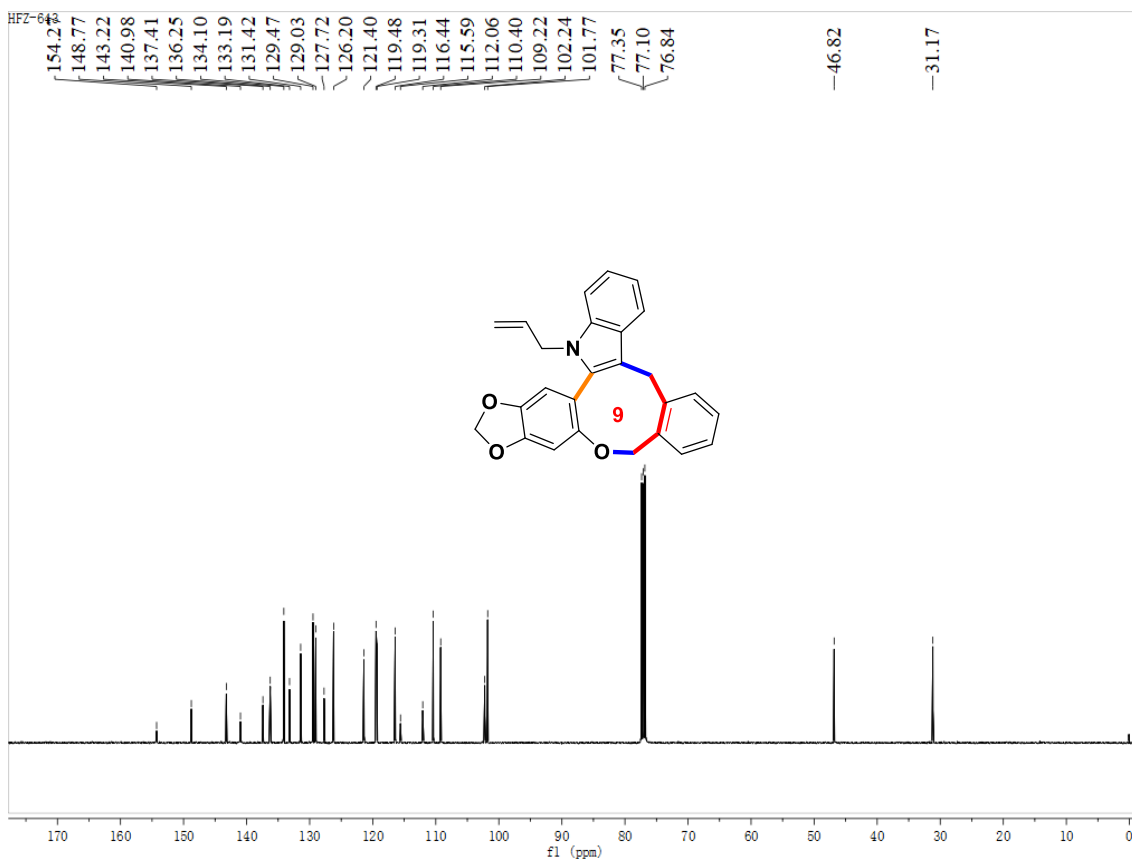

**17-(prop-2-yn-1-yl)-5,17-dihydro-10H-**  
**[1,3]dioxolo[4',5'':4,5']benzo[1',2':2,3]benzo[7,8]oxonino[4,5-b]indole (4d)**

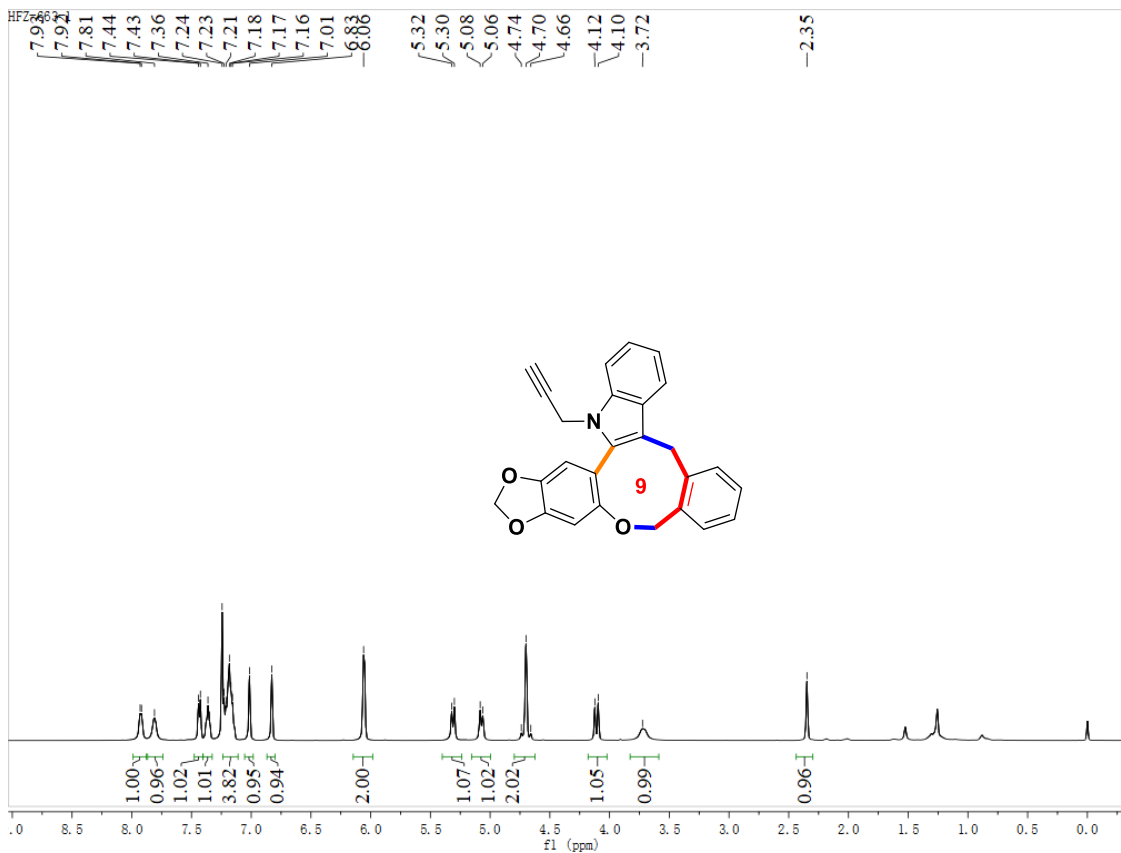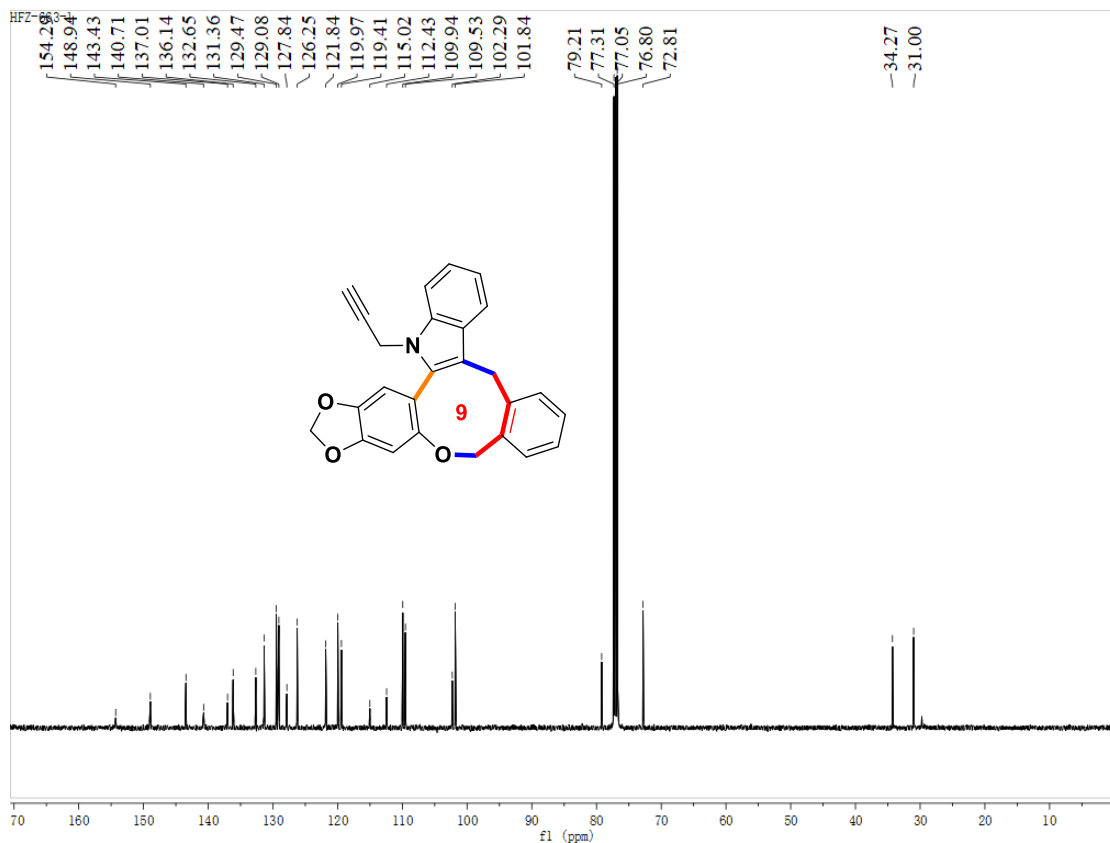



17-benzyl-3-methyl-5,17-dihydro-10H-[1,3]dioxolo[4',5':4,5']benzo[1',2':2,3]benzo[7,8]oxonino[4,5-b]indole (4e)

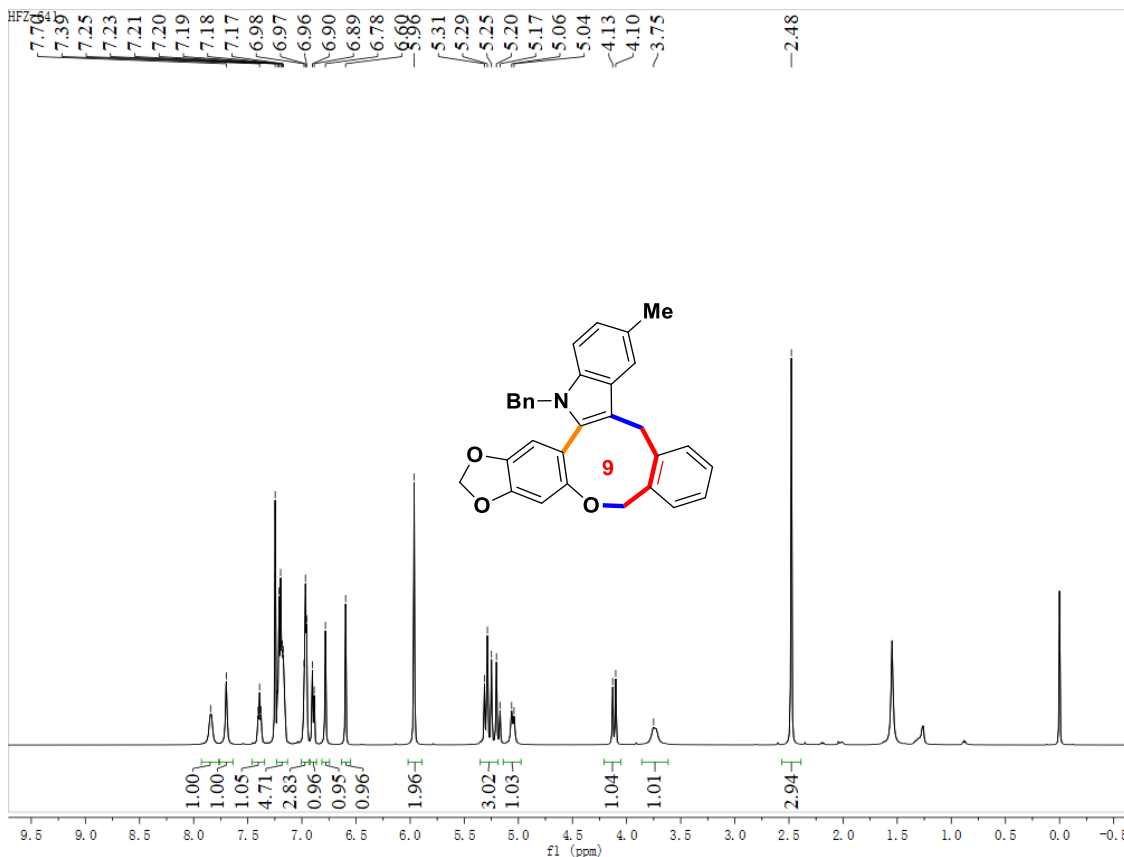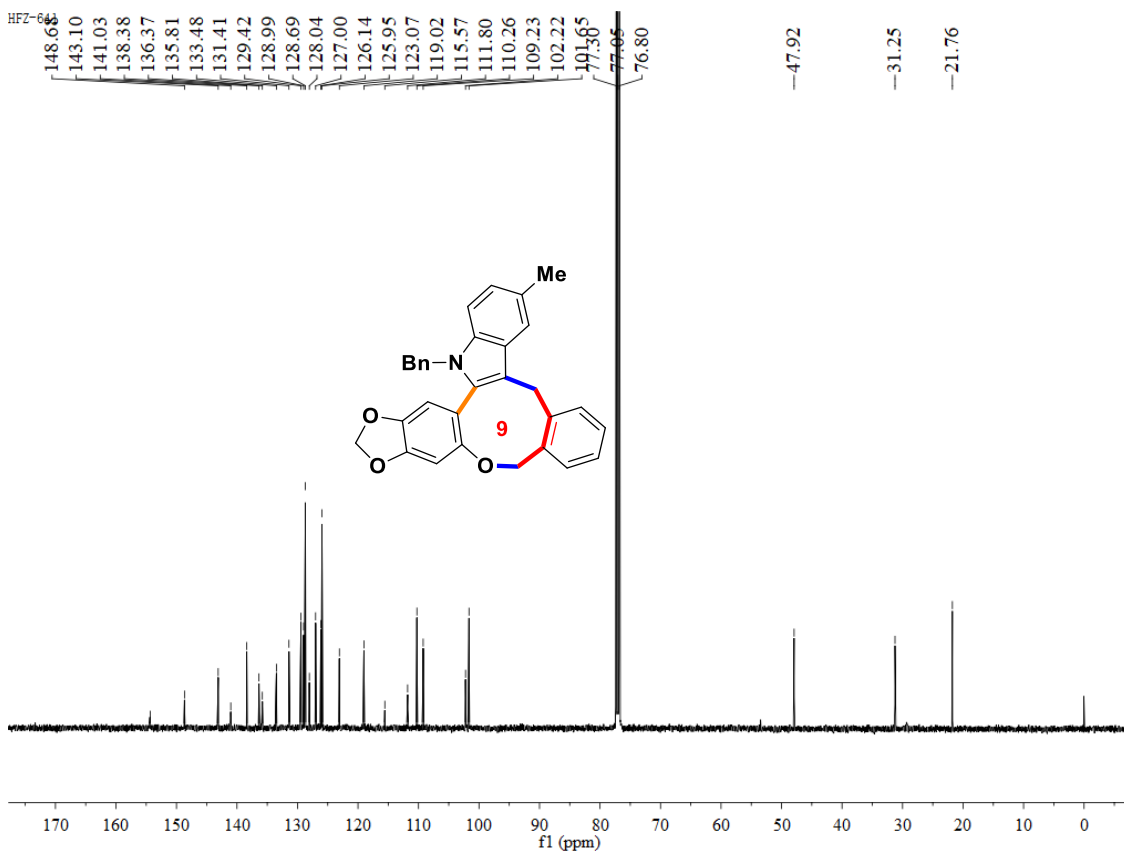

**1-methyl-6'-vinyl-6',7'-dihydrospiro[indoline-3,8'-[1,3]dioxolo[4,5-g]chromen]-2-one (6a)**

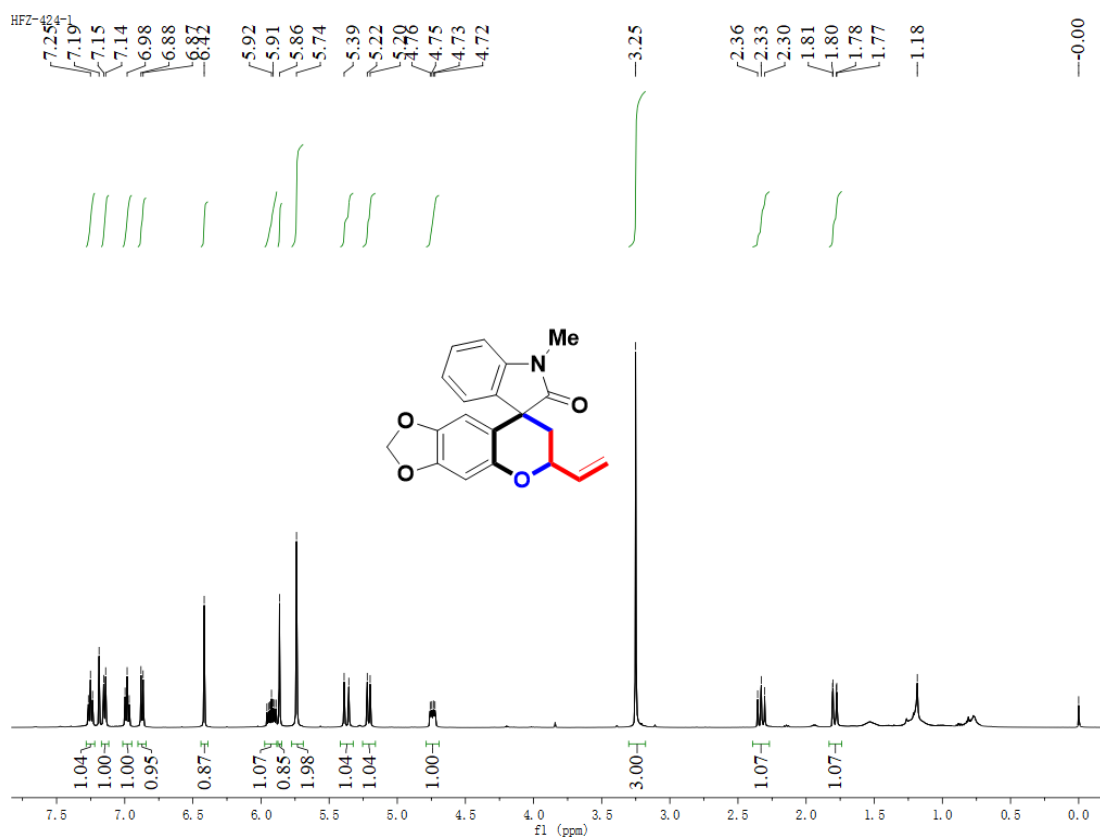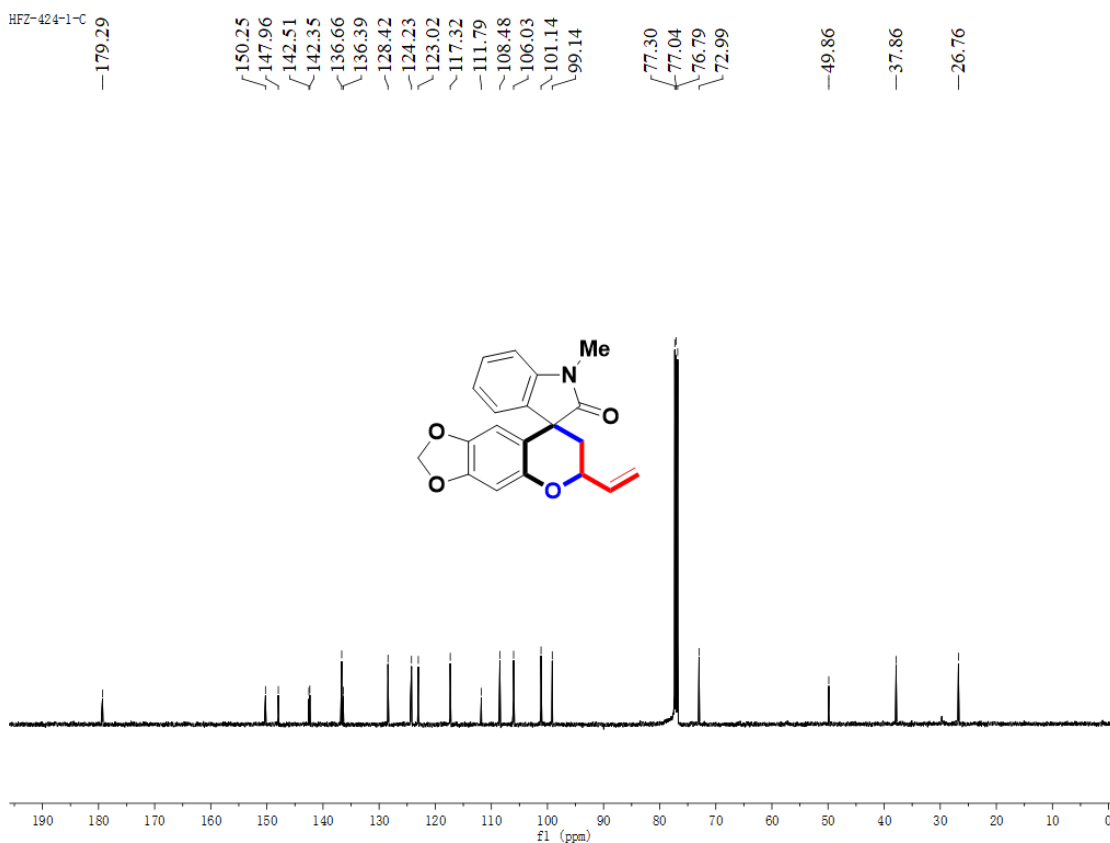

1-benzyl-6'-vinyl-6',7'-dihydrospiro[indoline-3,8'-[1,3]dioxolo[4,5-g]chromen]-2-one (6b)

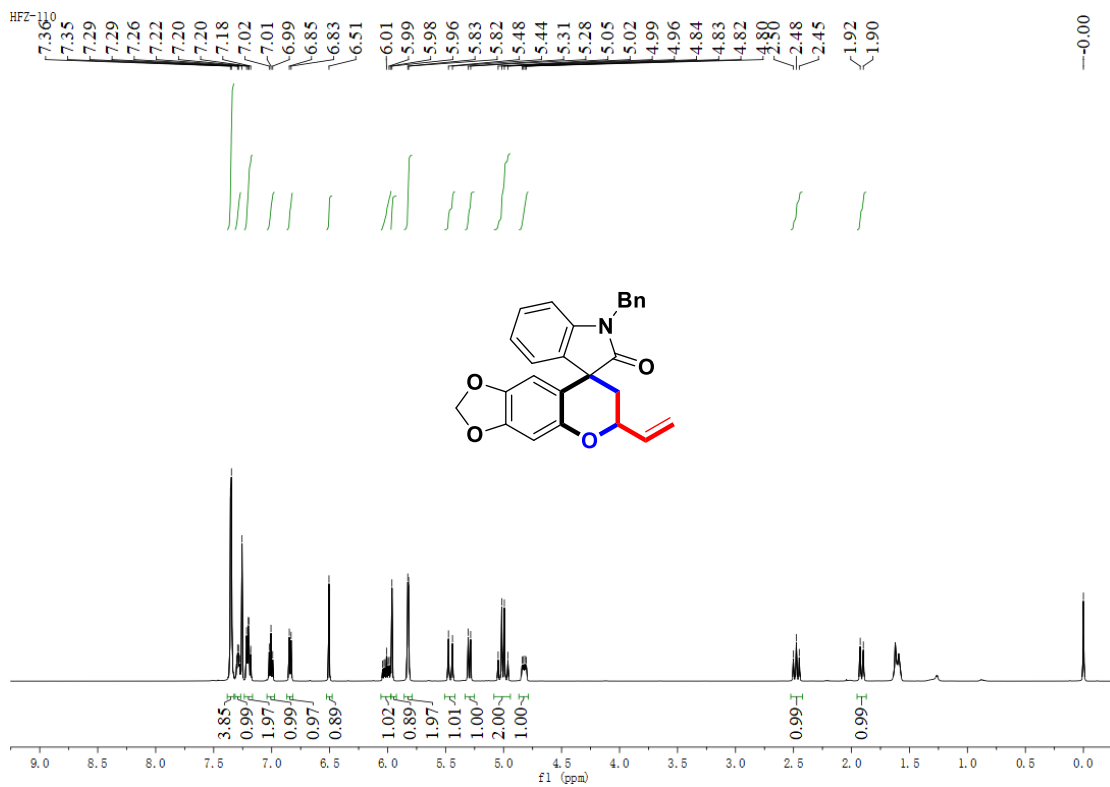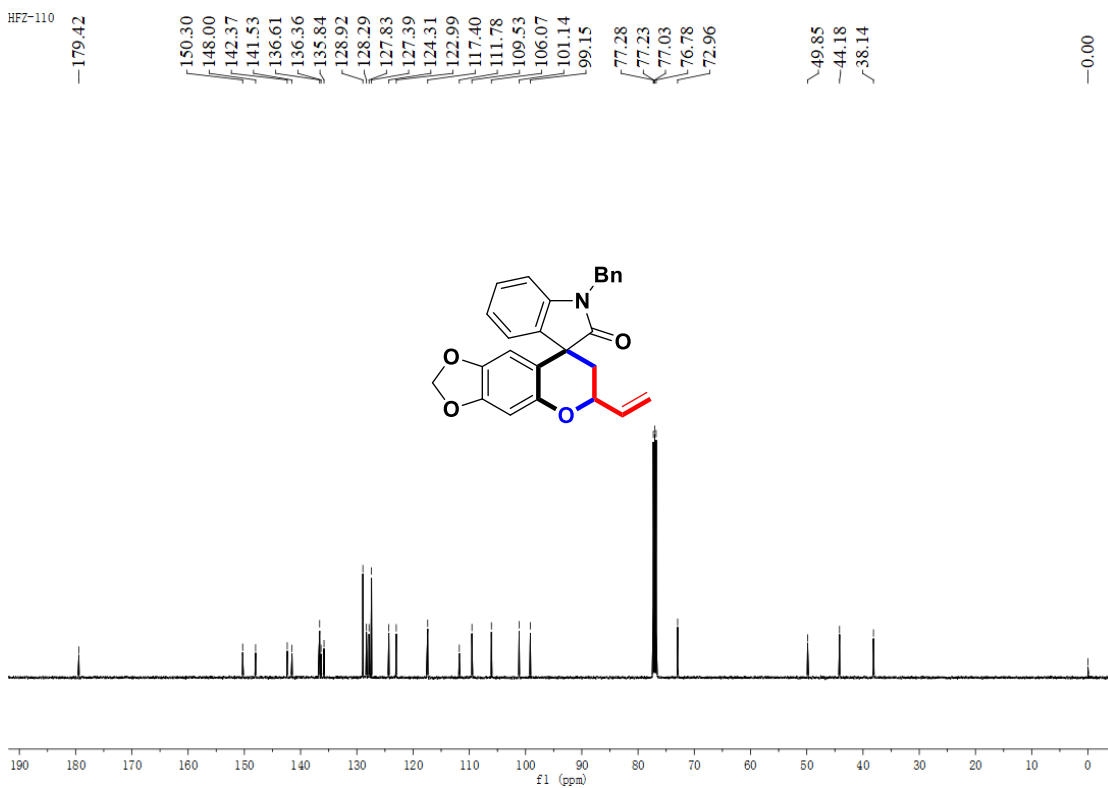

**1-allyl-6'-vinyl-6',7'-dihydrospiro[indoline-3,8'-[1,3]dioxolo[4,5-g]chromen]-2-one (6c)**

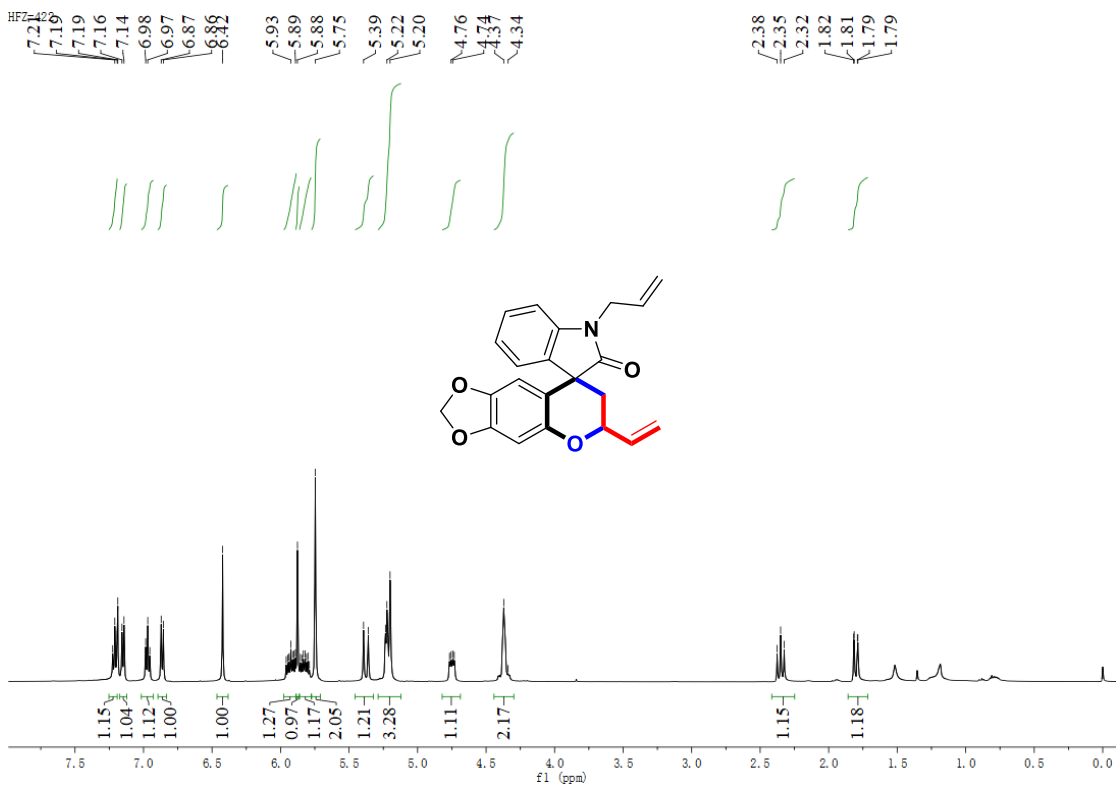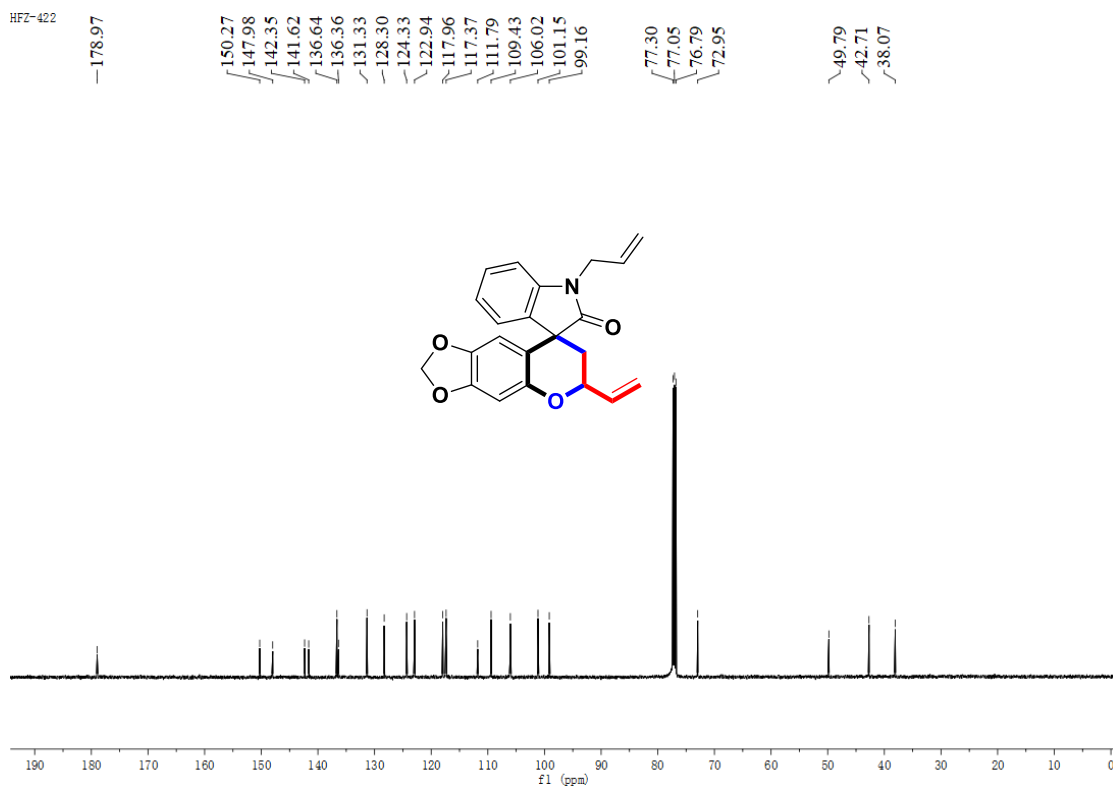

**1-(prop-2-yn-1-yl)-6'-vinyl-6',7'-dihydrospiro[indoline-3,8'-[1,3]dioxolo[4,5-g]chromen]-2-one (6d)**

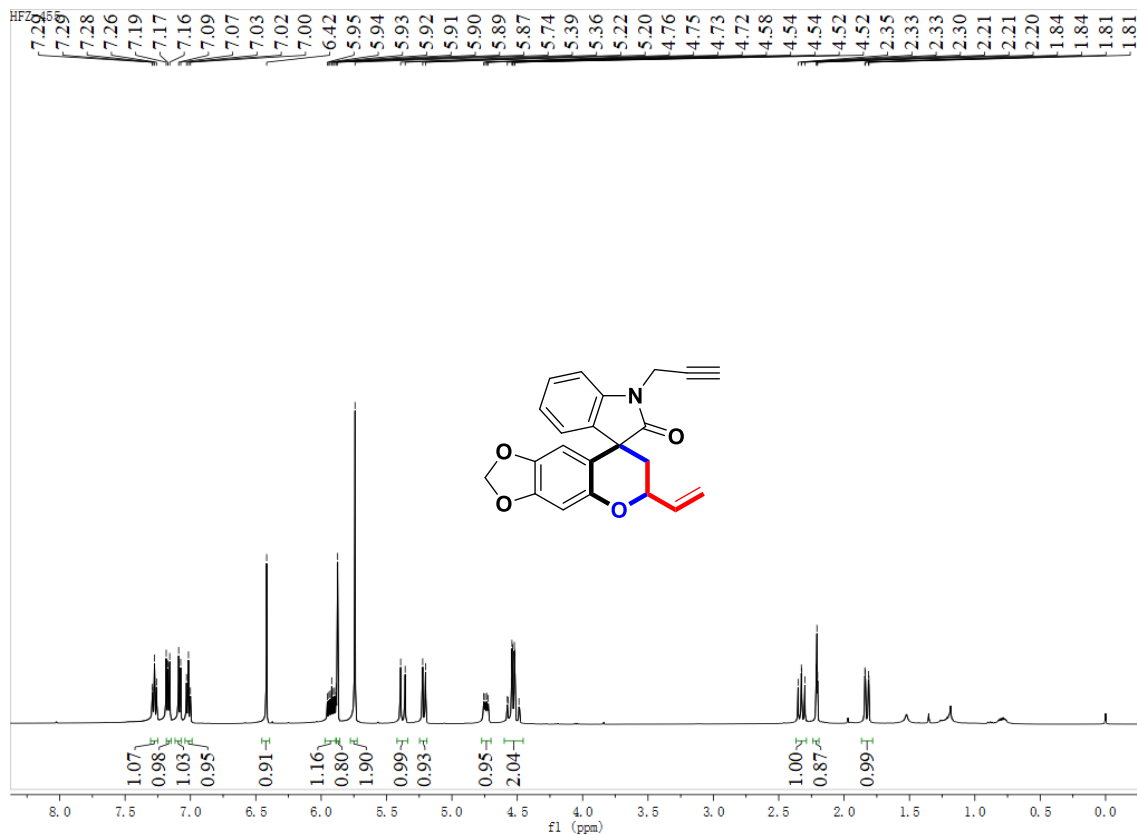

HFZ-455-C

— 178.42  
 ~ 150.20  
 ~ 148.05  
 ~ 142.38  
 ~ 140.52  
 ~ 136.56  
 ~ 136.18  
 ~ 128.40  
 ~ 124.35  
 ~ 123.41  
 ~ 117.40  
 ~ 111.64  
 ~ 109.59  
 ~ 105.99  
 ~ 101.16  
 ~ 99.15  
 ~ 77.31  
 ~ 77.05  
 ~ 76.80  
 ~ 72.92  
 ~ 72.62  
 — 49.74  
 — 37.77  
 — 29.70

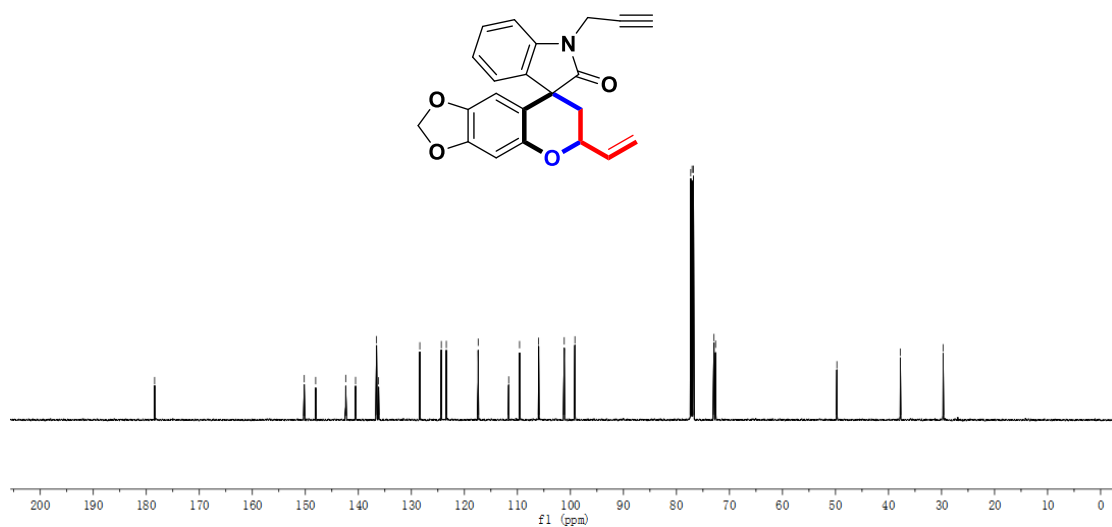

**1-benzyl-5-methyl-6'-vinyl-6',7'-dihydrospiro[indoline-3,8'-[1,3]dioxolo[4,5-g]chromen]-2-one**  
(6e)

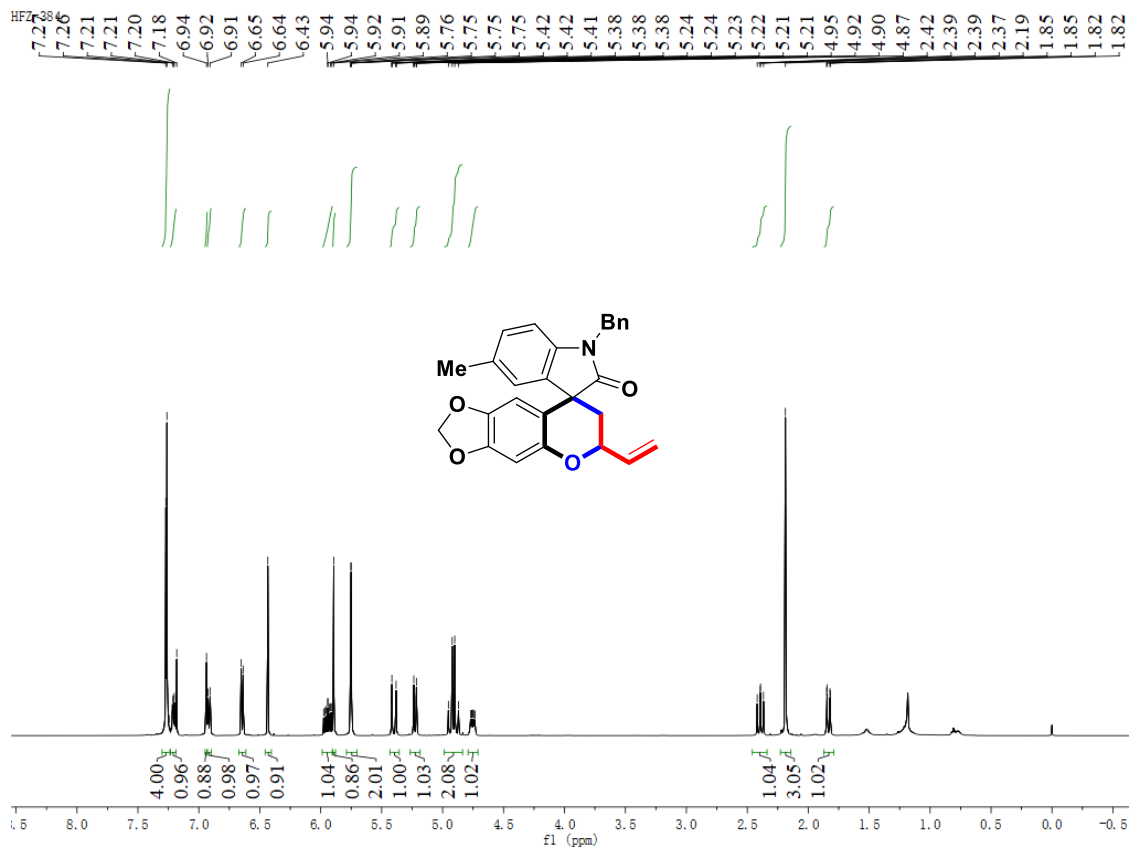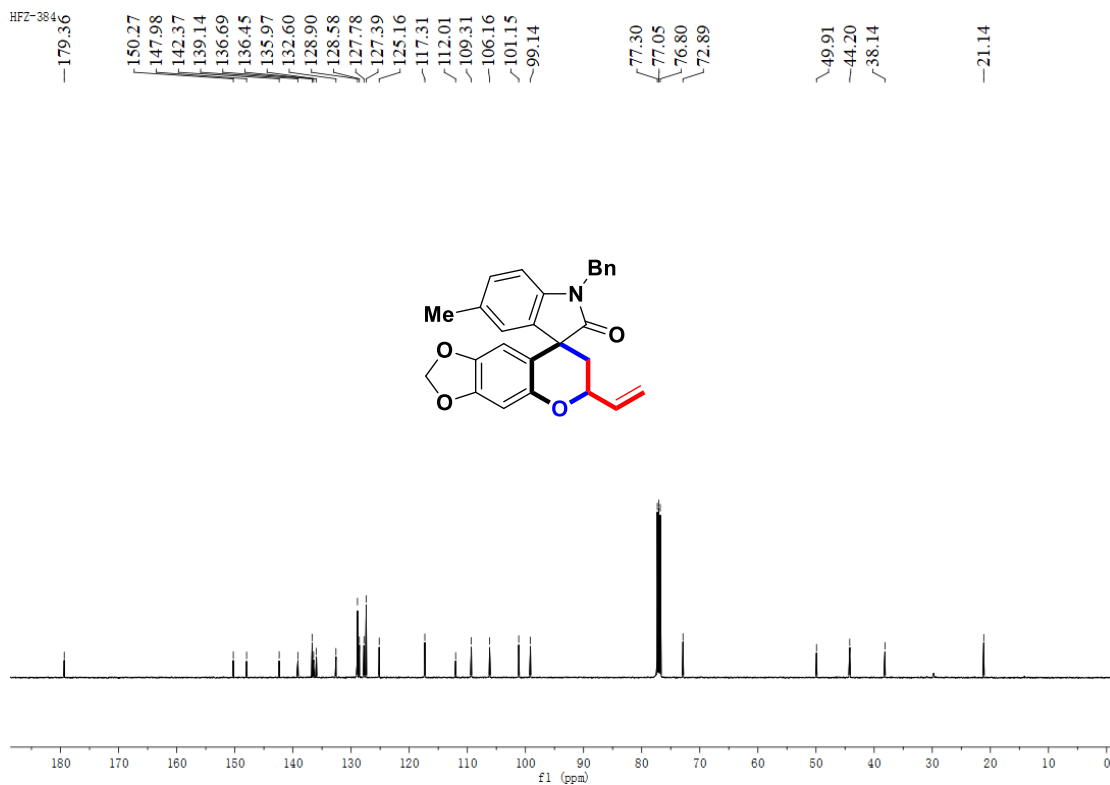

**1-benzyl-5-methoxy-6'-vinyl-6',7'-dihydrospiro[indoline-3,8'-[1,3]dioxolo[4,5-g]chromen]-2-one (6f)**

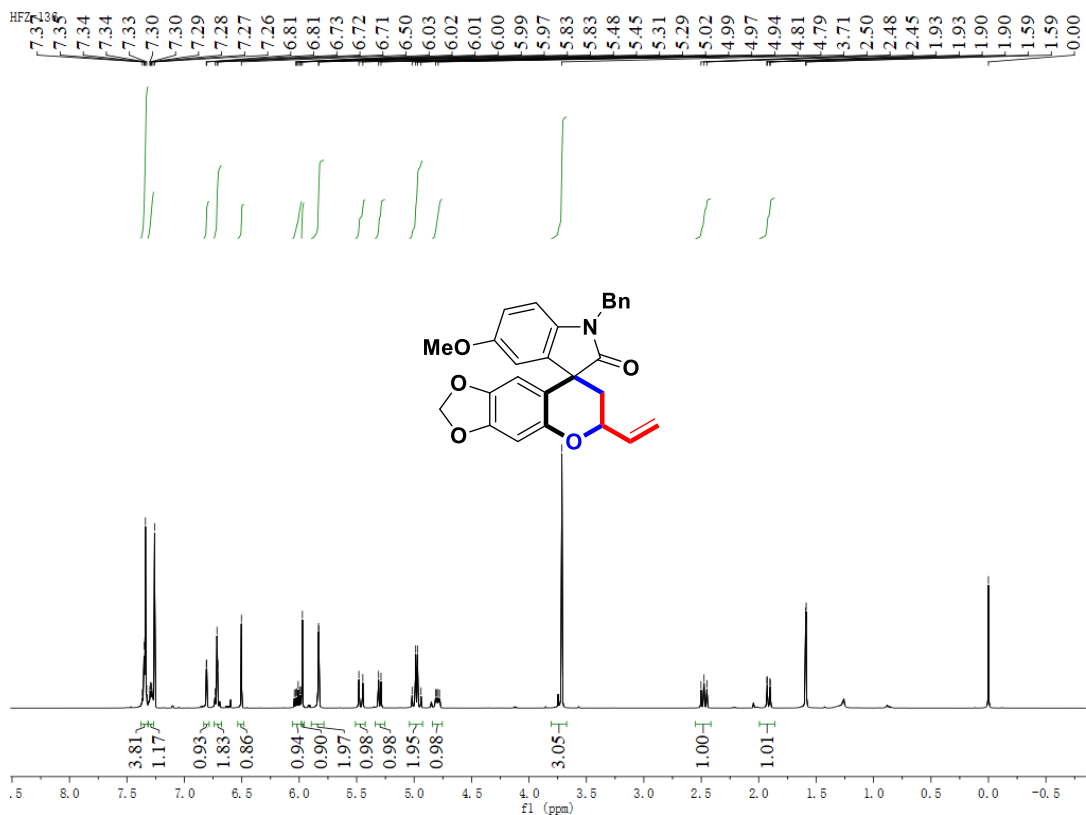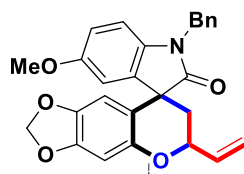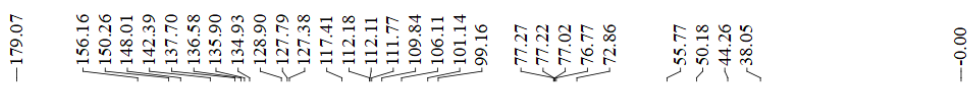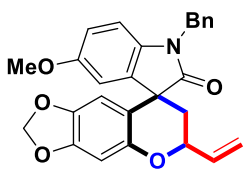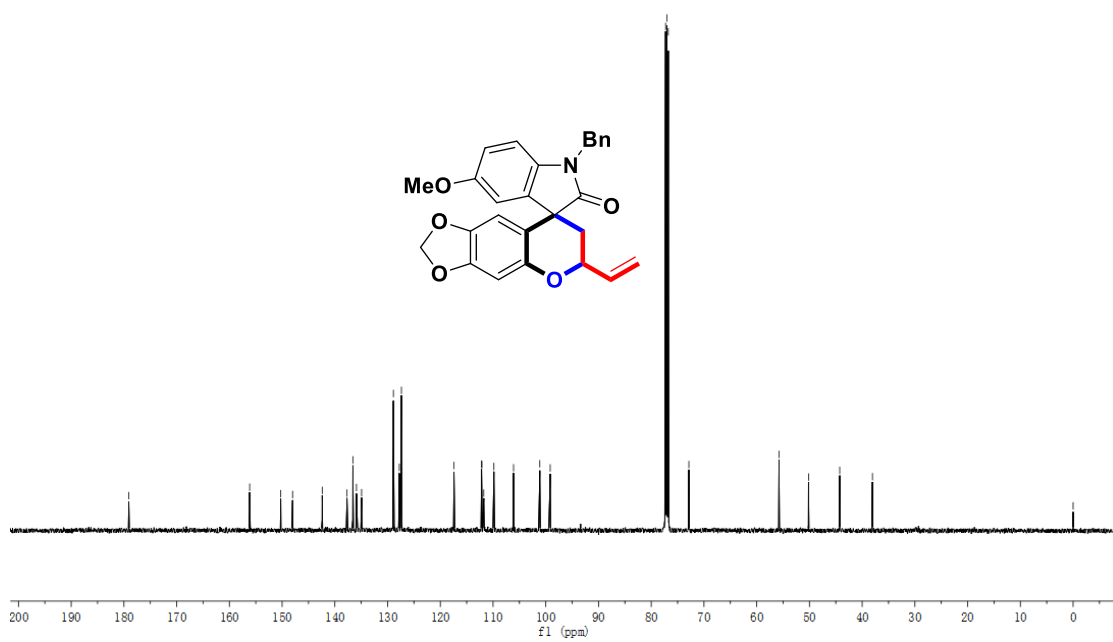

**1-benzyl-5-bromo-6'-vinyl-6',7'-dihydrospiro[indoline-3,8'-[1,3]dioxolo[4,5-g]chromen]-2-one**  
(6g)

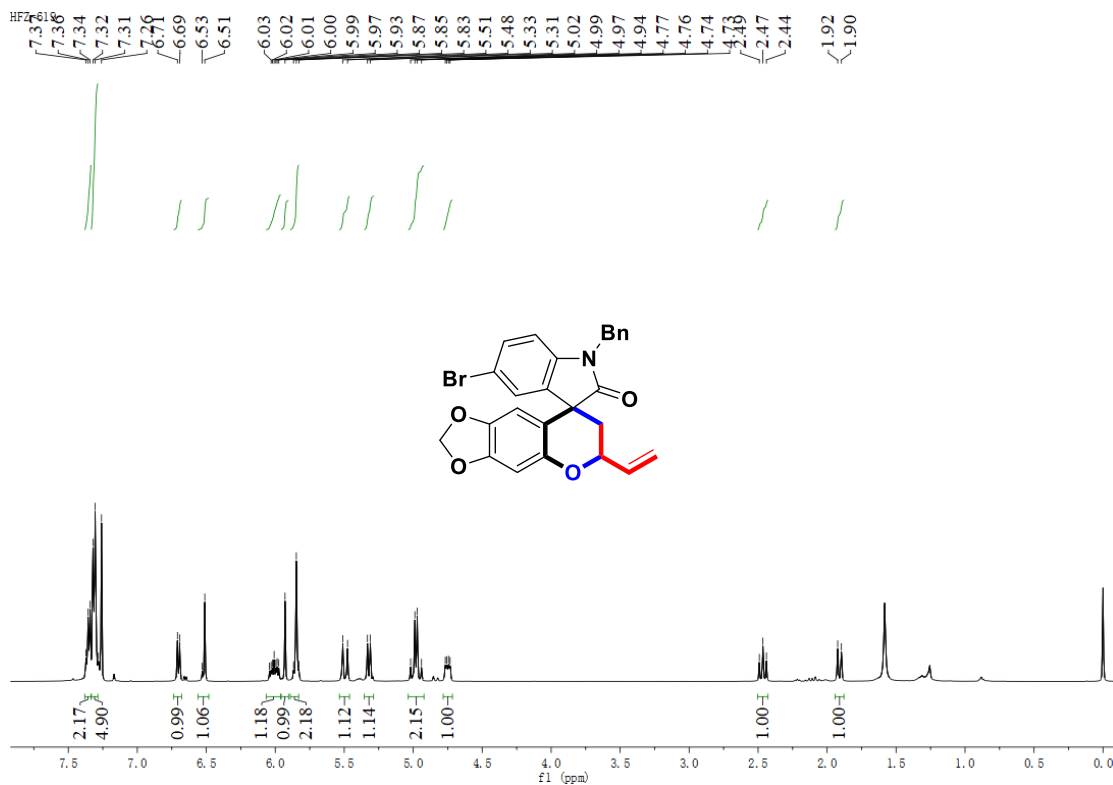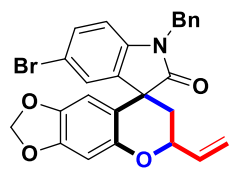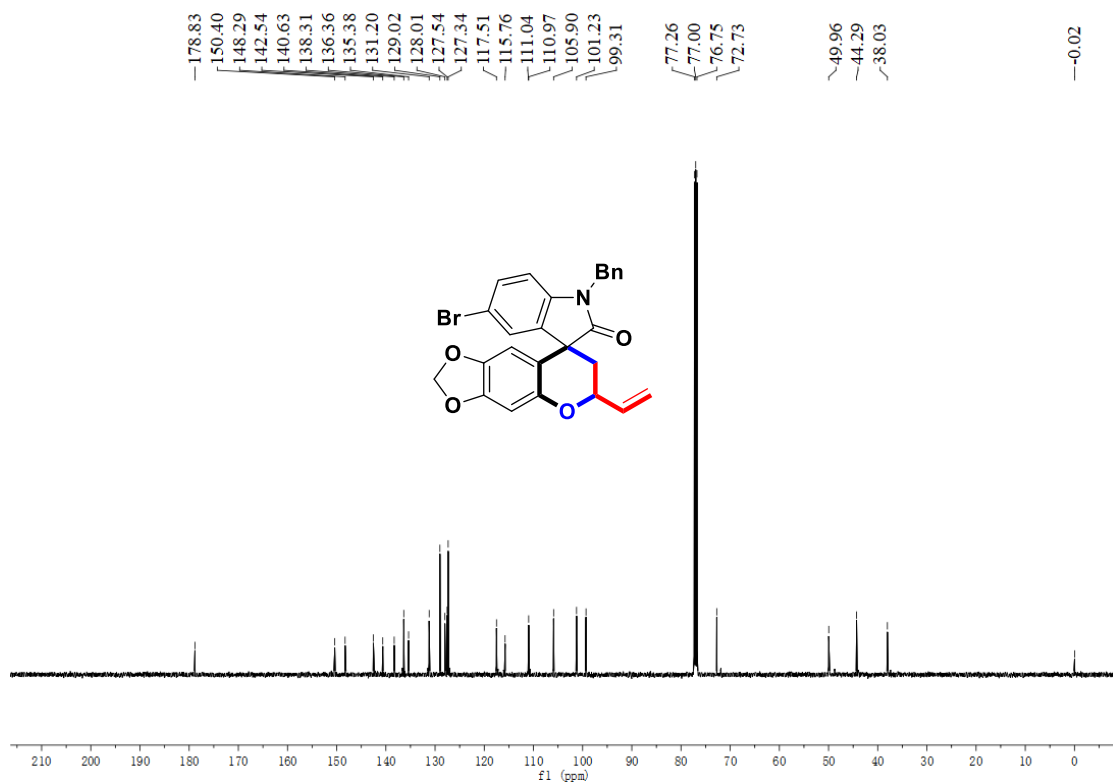



**1-benzyl-6-bromo-6'-vinyl-6',7'-dihydrospiro[indoline-3,8'-[1,3]dioxolo[4,5-g]chromen]-2-one**  
**(6h)**

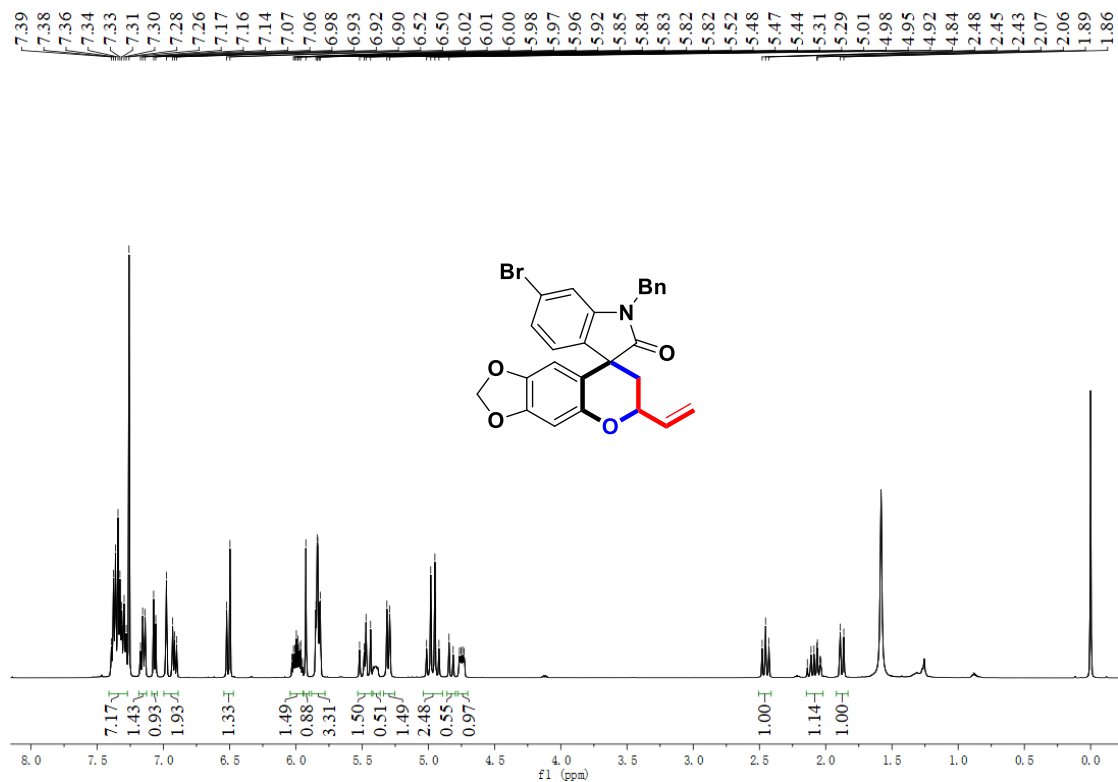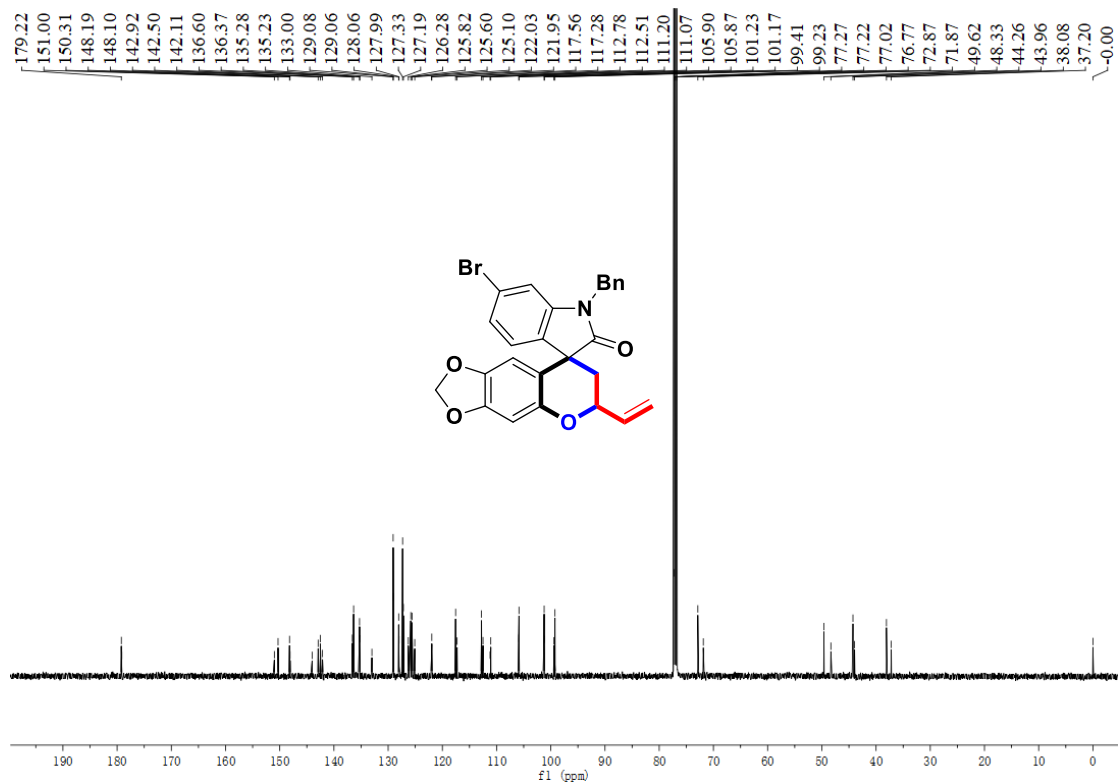

**1-benzyl-7-chloro-6'-vinyl-6',7'-dihydrospiro[indoline-3,8'-[1,3]dioxolo[4,5-g]chromen]-2-one**  
**(6i)**

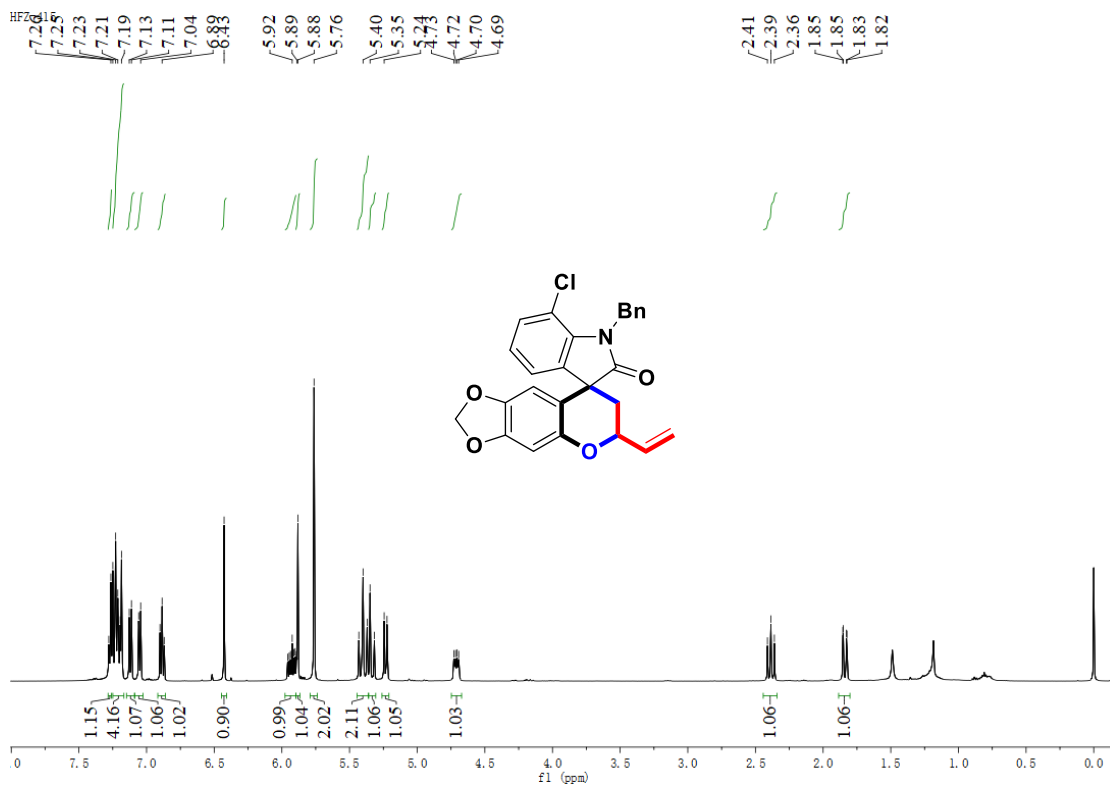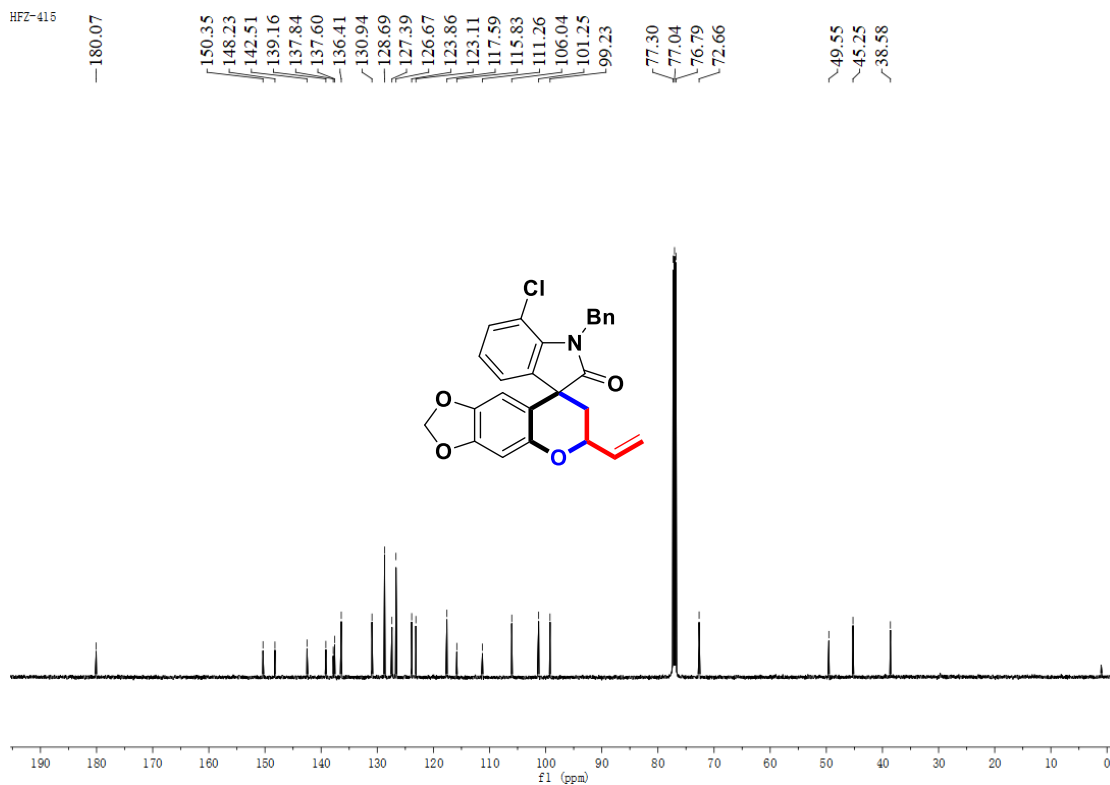

**1-benzyl-7-fluoro-6'-vinyl-6',7'-dihydrospiro[indoline-3,8'-[1,3]dioxolo[4,5-g]chromen]-2-one**  
**(6j)**

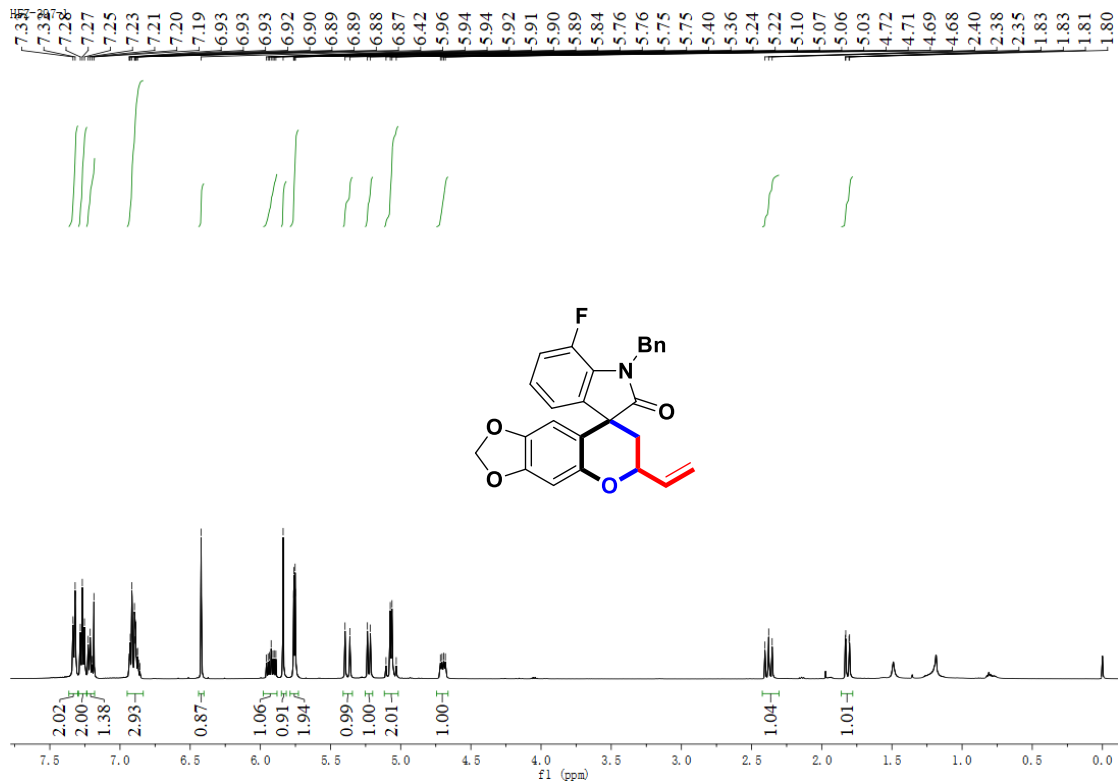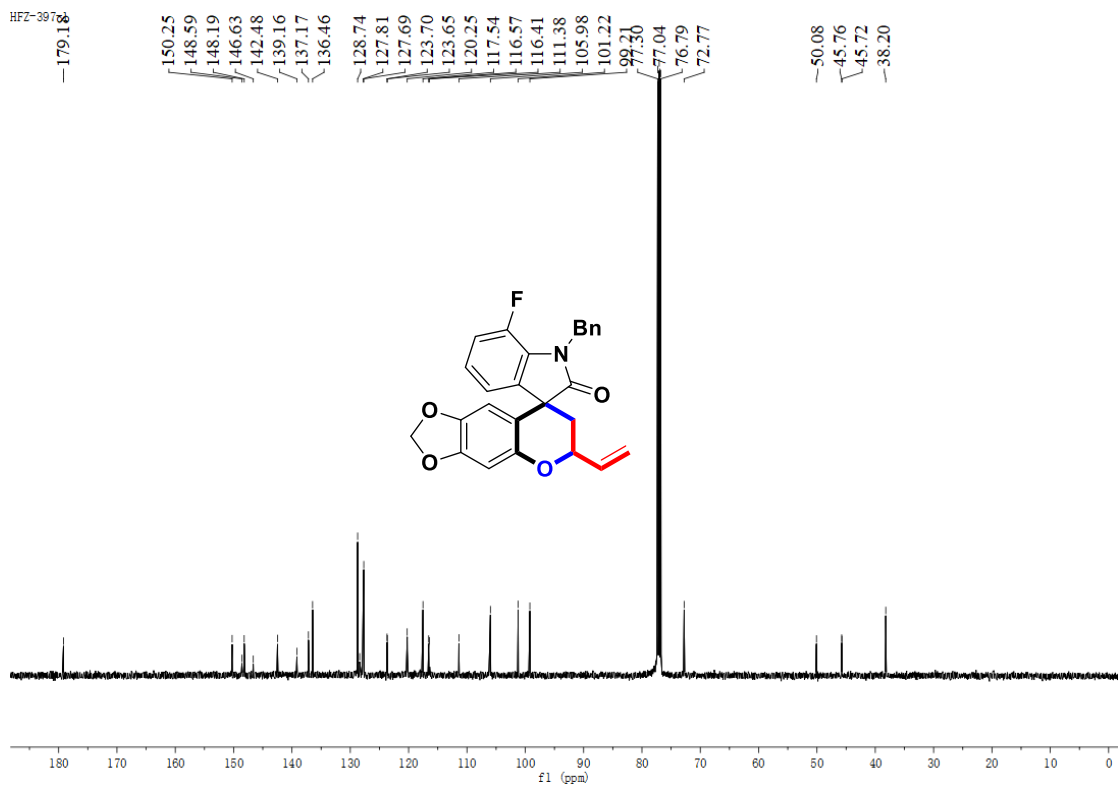

**1-benzyl-7-bromo-6'-vinyl-6',7'-dihydrospiro[indoline-3,8'-[1,3]dioxolo[4,5-g]chromen]-2-one**  
**(6k)**

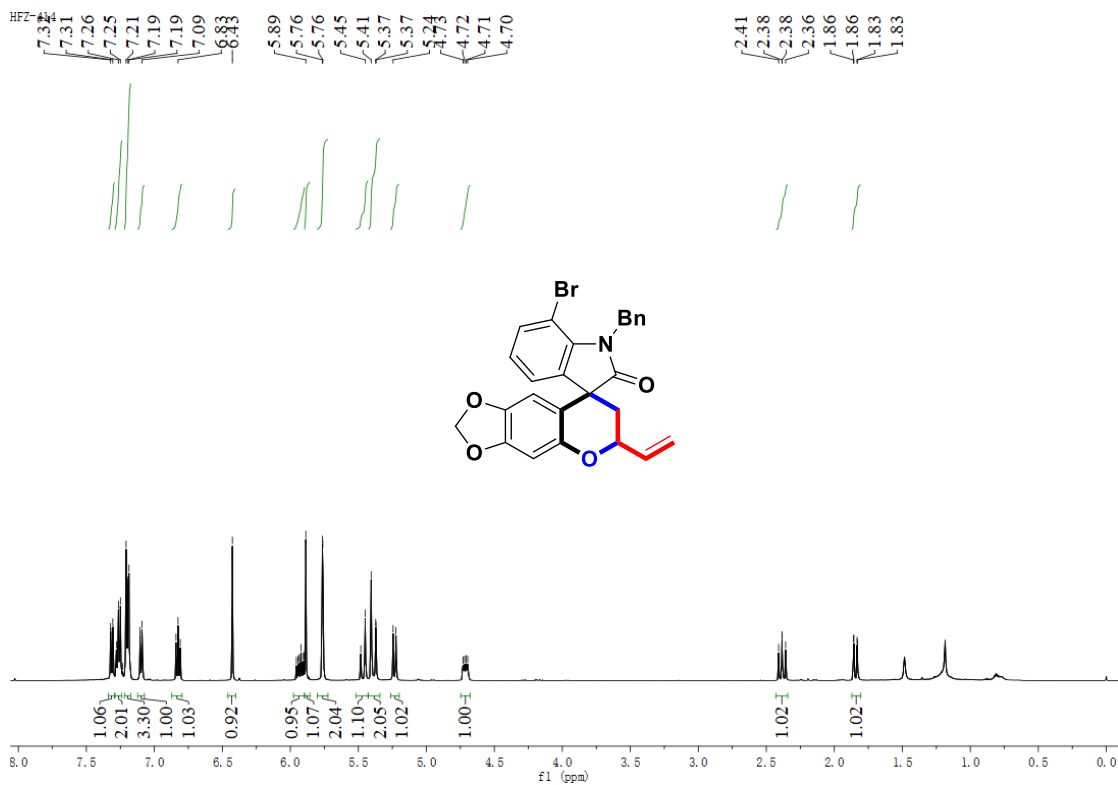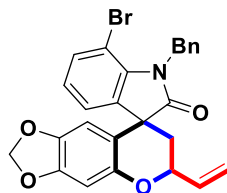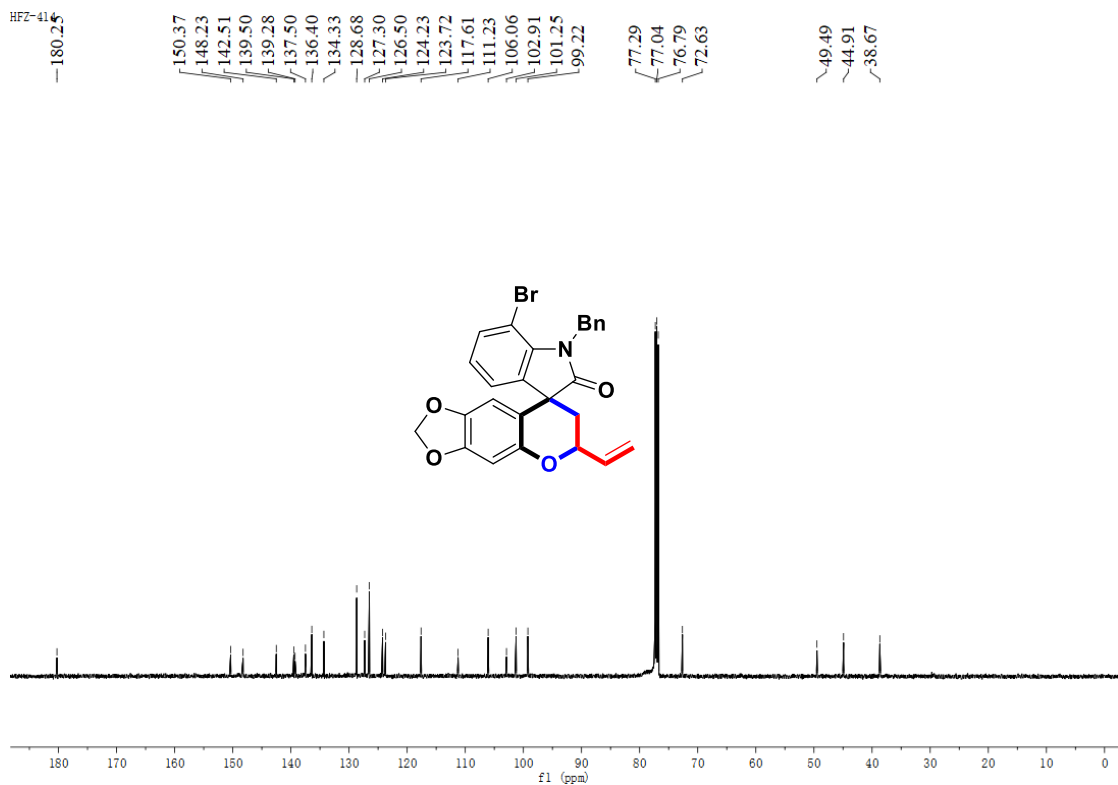

1'-benzyl-2-vinyl-2,3-dihydrospiro[benzo[h]chromene-4,3'-indolin]-2'-one (6l)

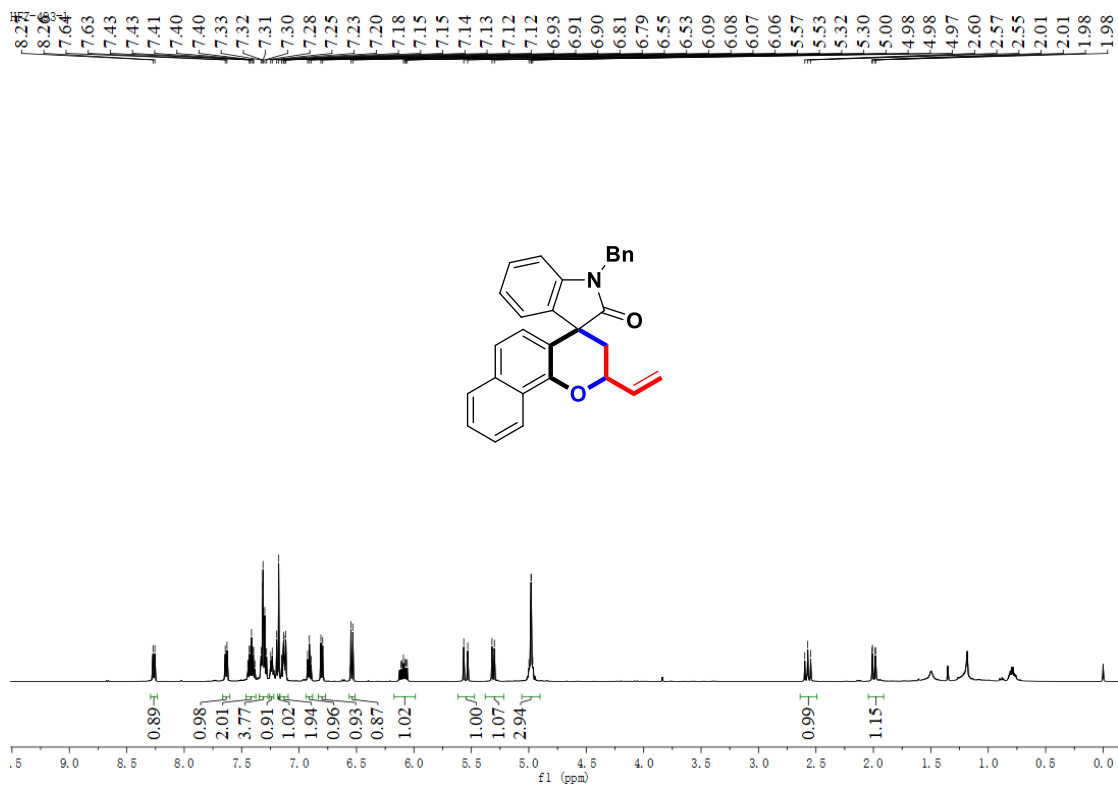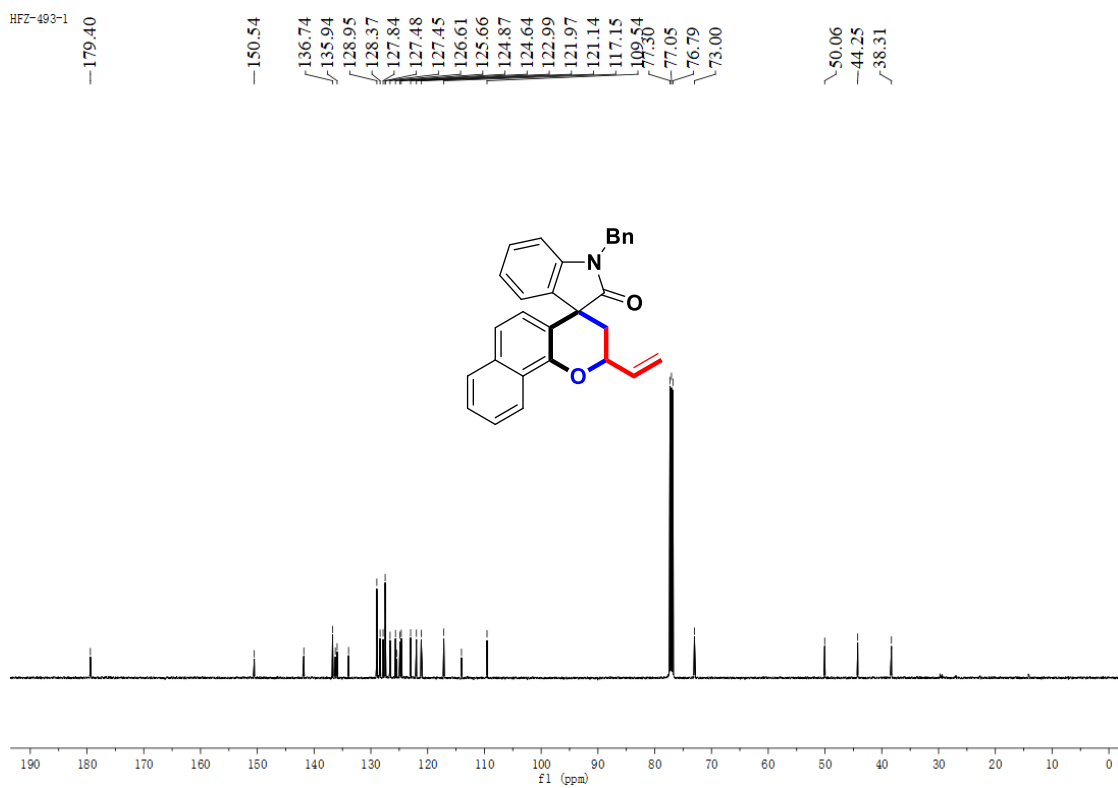

**(E)-3-(4-bromobut-2-en-1-yl)-3-(6-hydroxybenzo[d][1,3]dioxol-5-yl)-1-methylindolin-2-one**  
**(7a)**

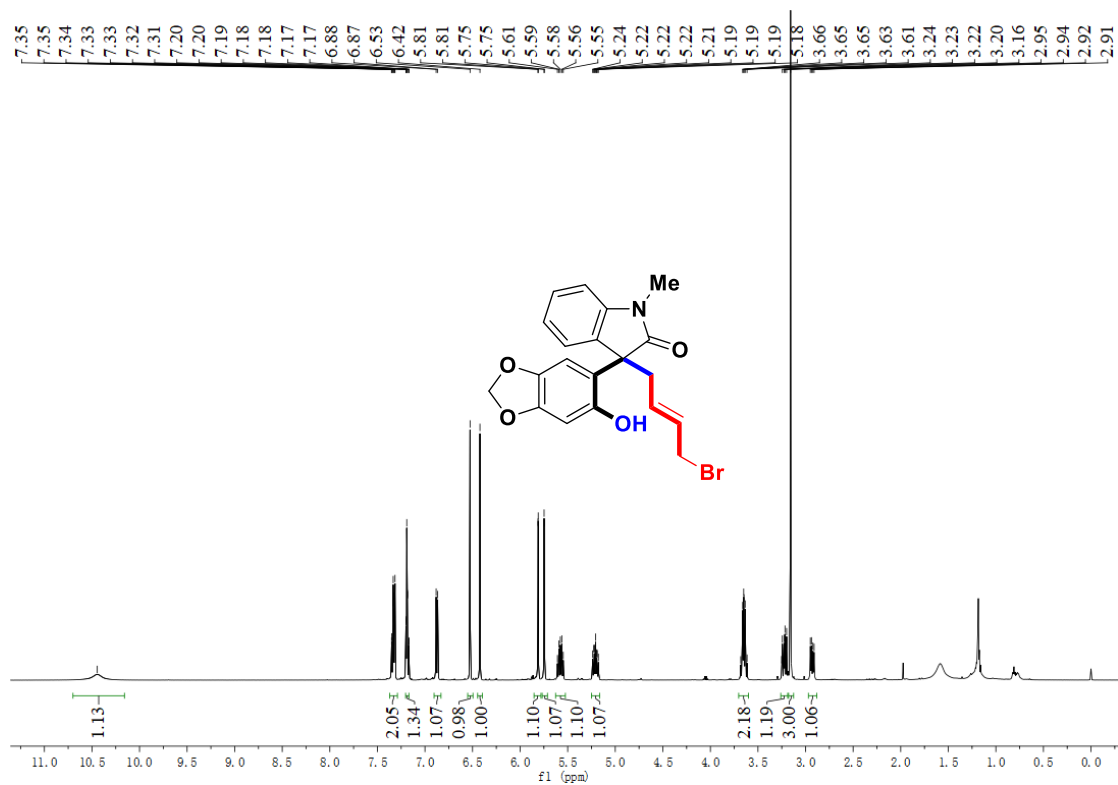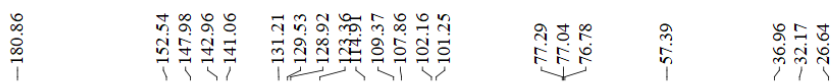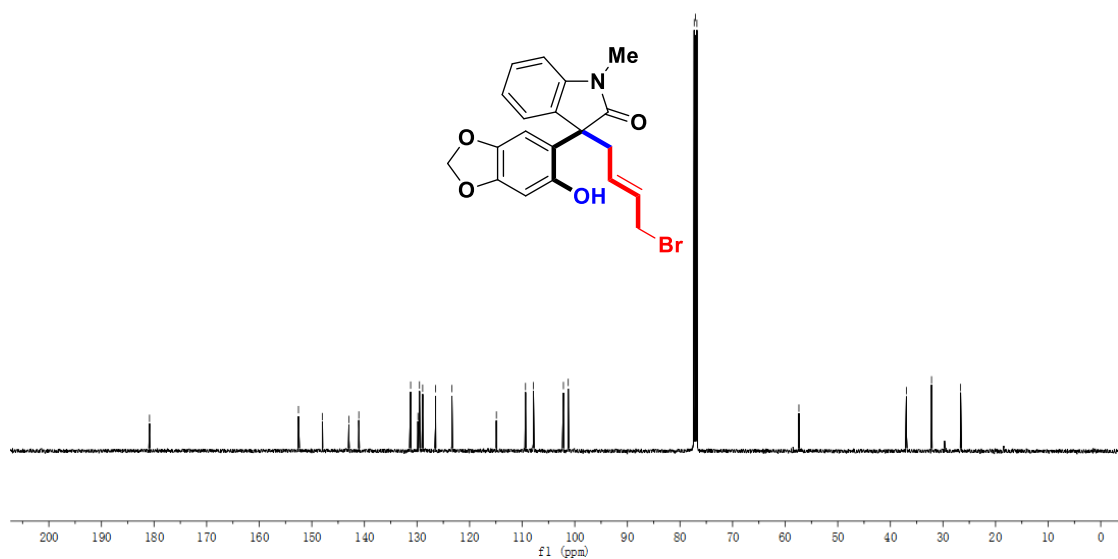

**(E)-3-(4-bromobut-2-en-1-yl)-3-(6-hydroxybenzo[d][1,3]dioxol-5-yl)-1-(prop-2-yn-1-yl)indolin-2-one (7b)**

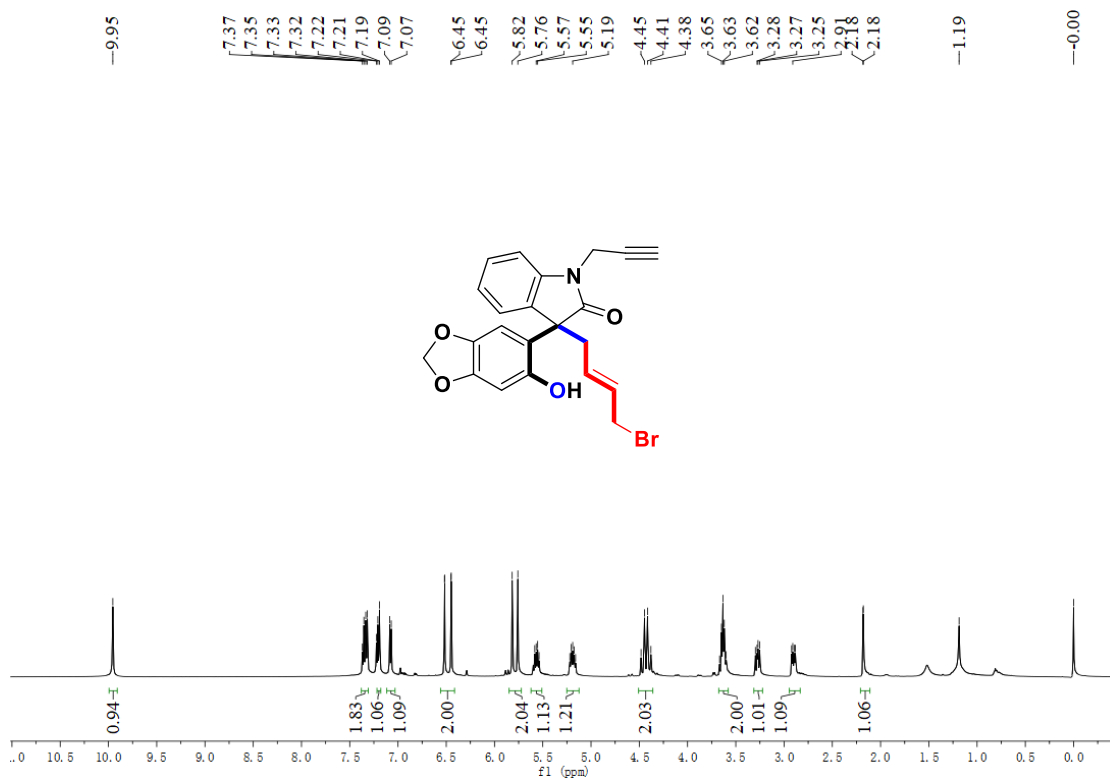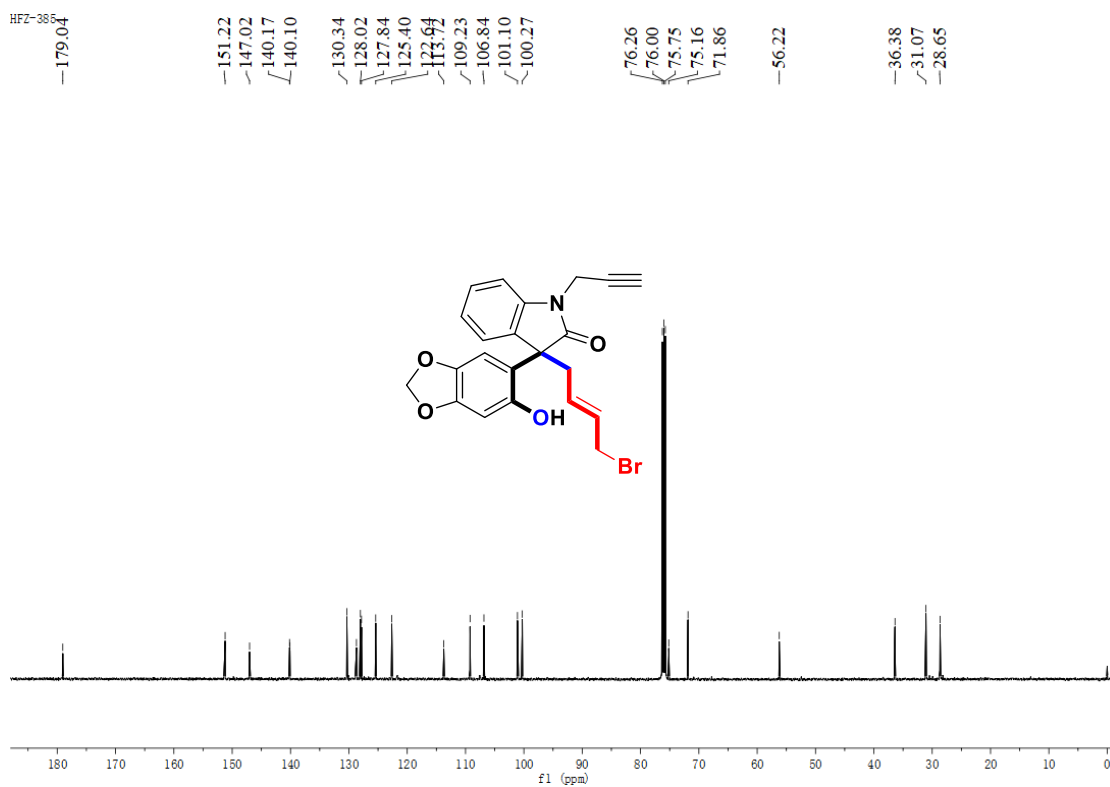

**(E)-1-benzyl-3-(4-bromobut-2-en-1-yl)-7-fluoro-3-(6-hydroxybenzo[d][1,3]dioxol-5-yl) indolin-2-one (7c)**

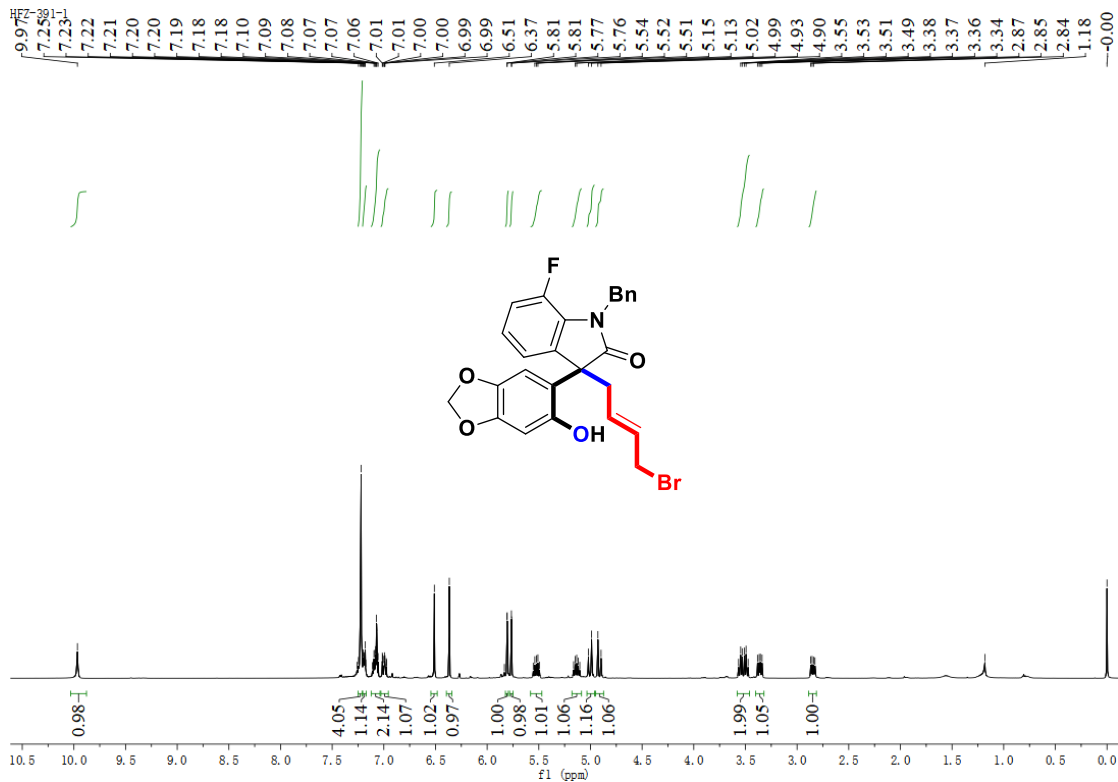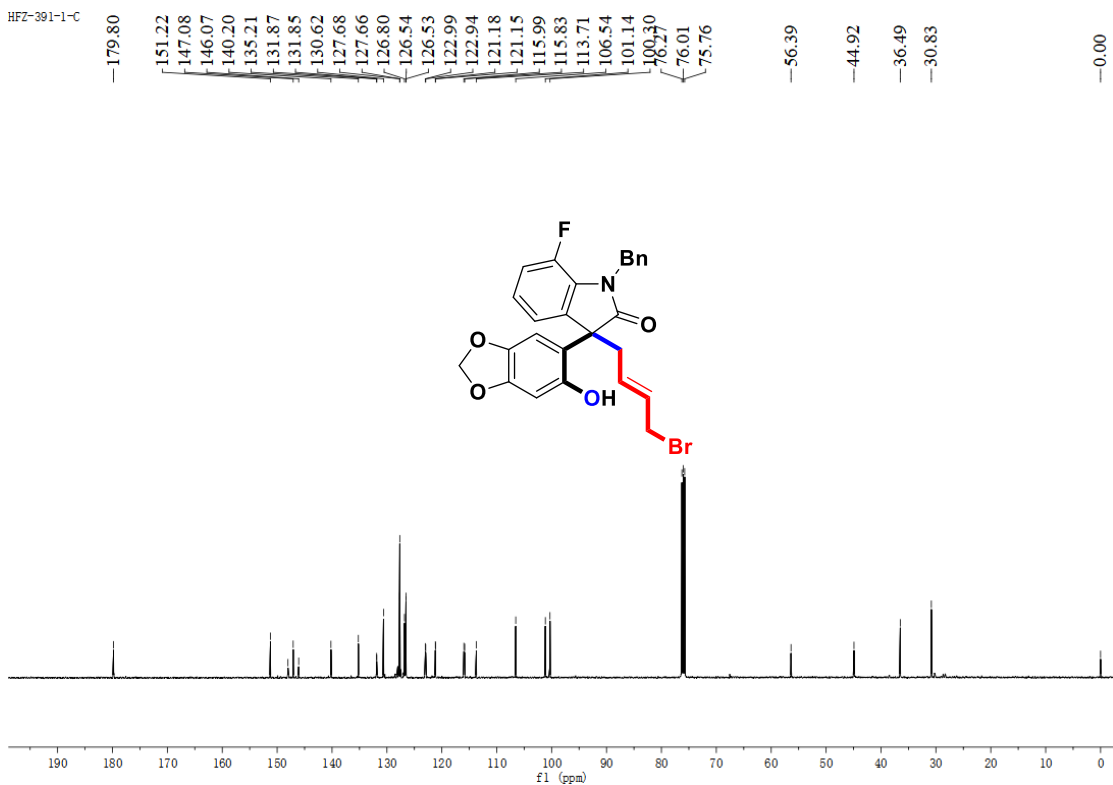



**1-methyl-6'-((1E,3E)-4-phenylbuta-1,3-dien-1-yl)-6',7'-dihydrospiro[indoline-3,8'-[1,3]dioxolo[4,5-g]chromen]-2-one (8a)**

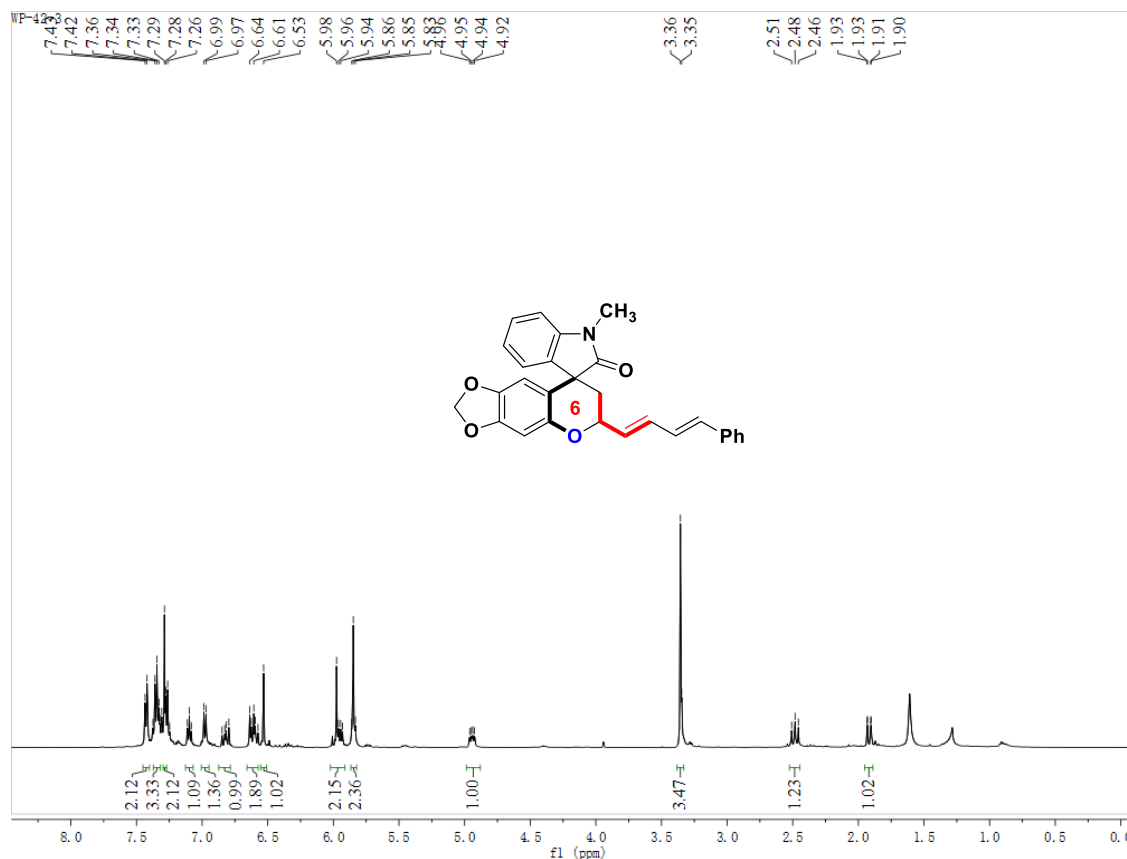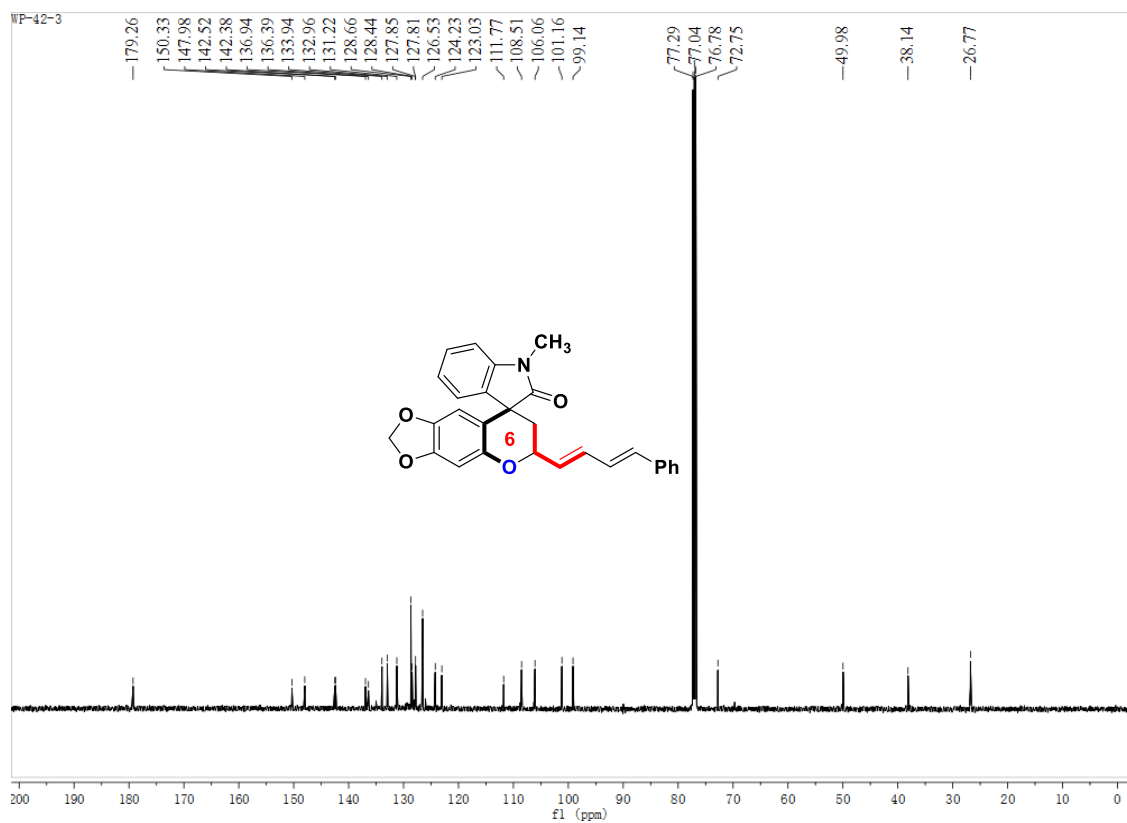

**1-benzyl-6'-((1E,3E)-4-phenylbuta-1,3-dien-1-yl)-6',7'-dihydrospiro[indoline-3,8'-[1,3]dioxolo[4,5-g]chromen]-2-one (8b)**

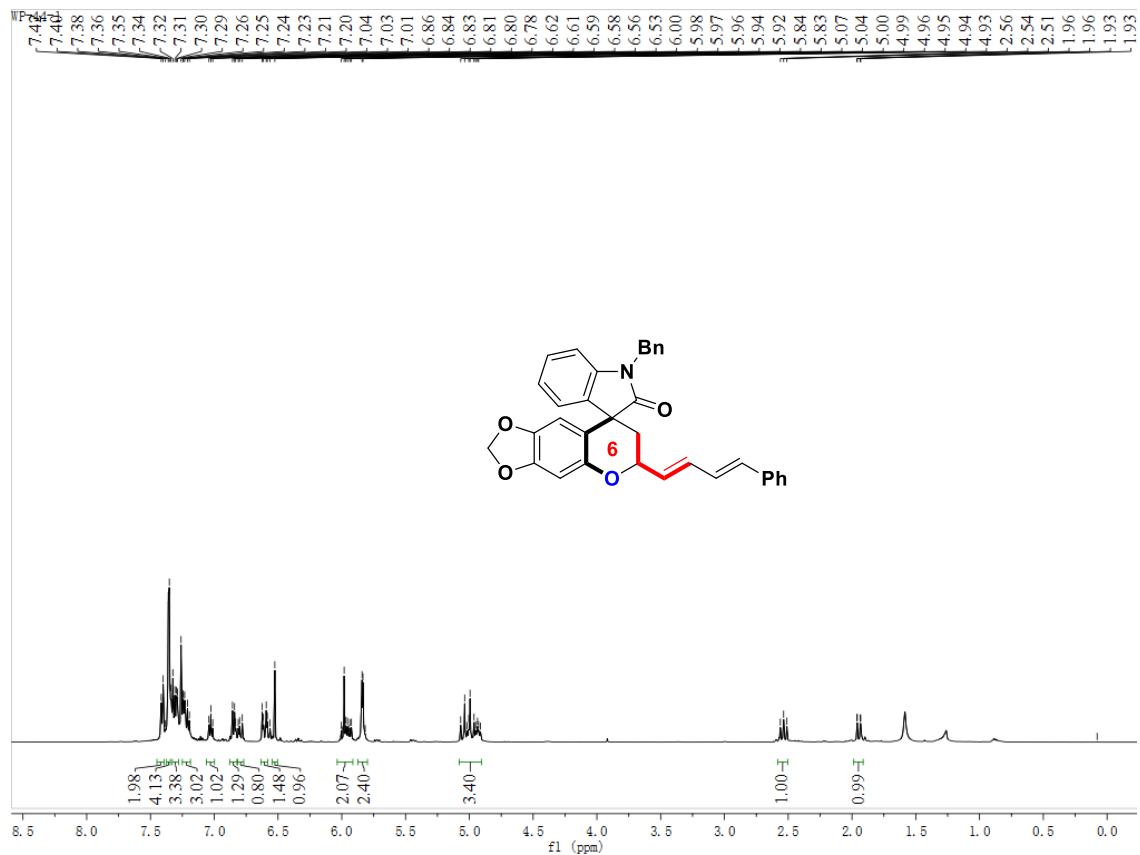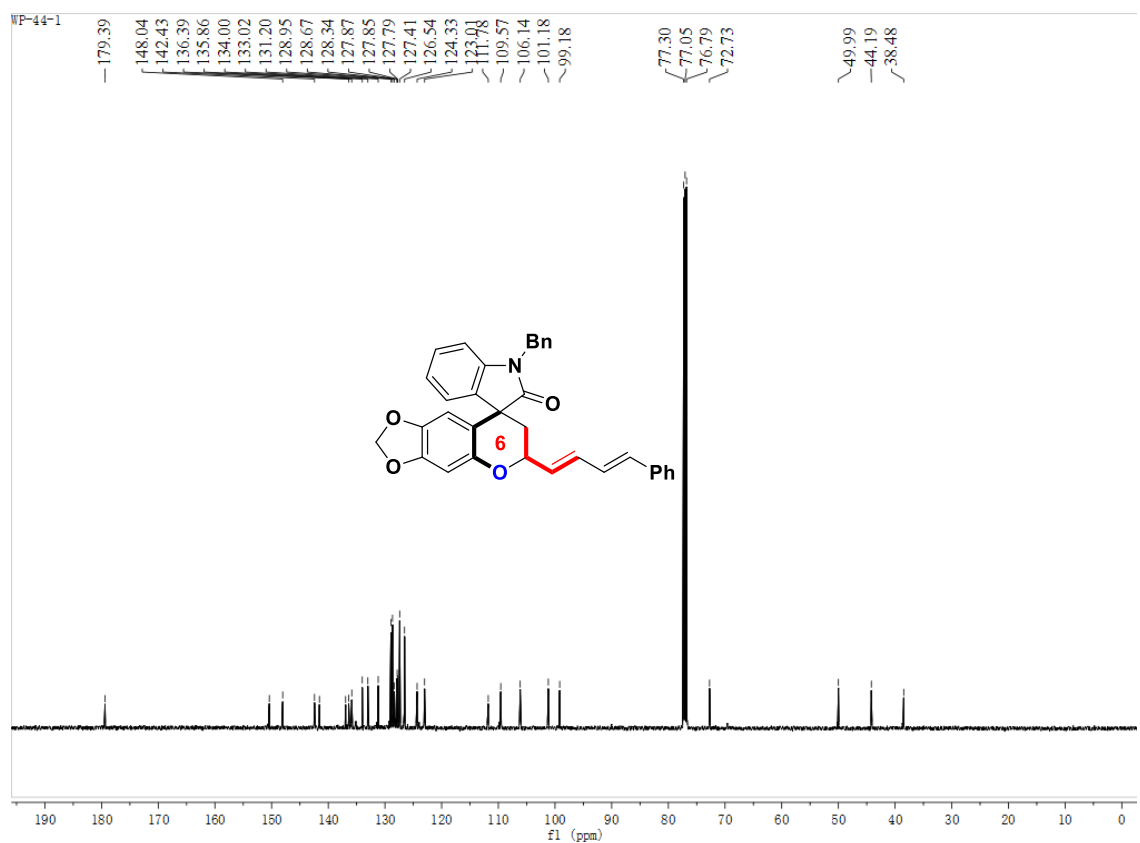

**1-benzyl-3-(3-(bromomethyl)benzyl)-3-(6-hydroxybenzo[d][1,3]dioxol-5-yl)indolin-2-one (10a)**

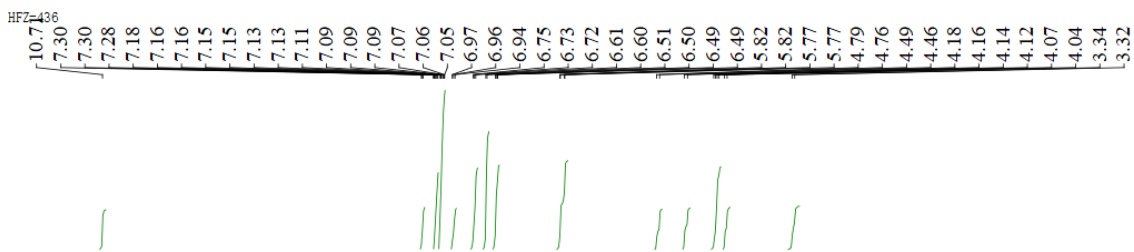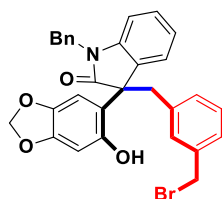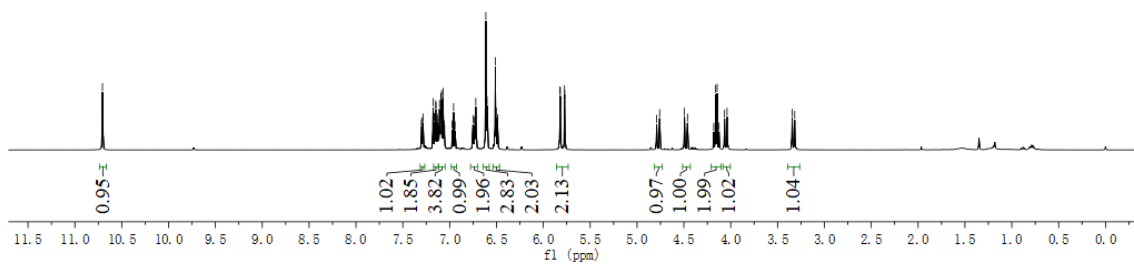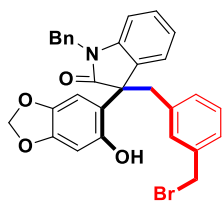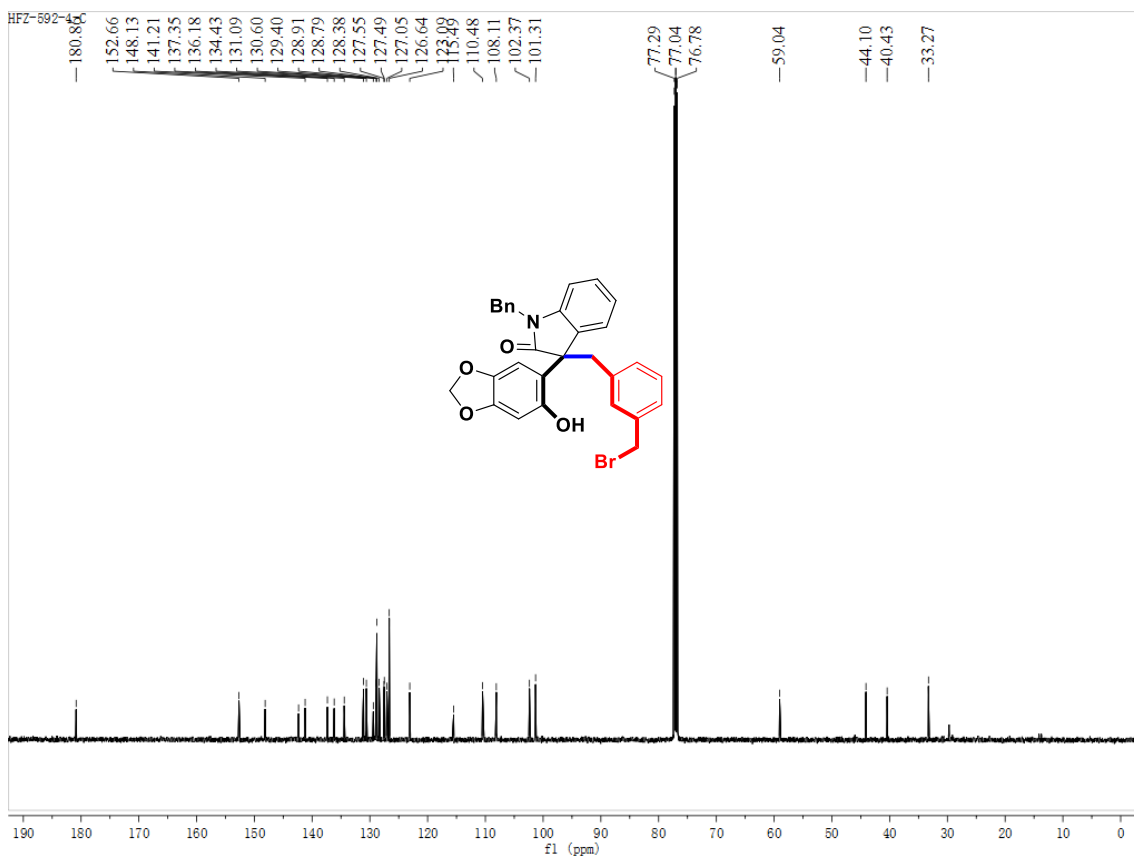

**1-benzyl-6'H,12'H-spiro[indoline-3,13'-[7,11](metheno)[1,3]dioxolo[4',5':4,5]benzo[1,2-b][1]oxacycloundecin]-2-one (11a)**

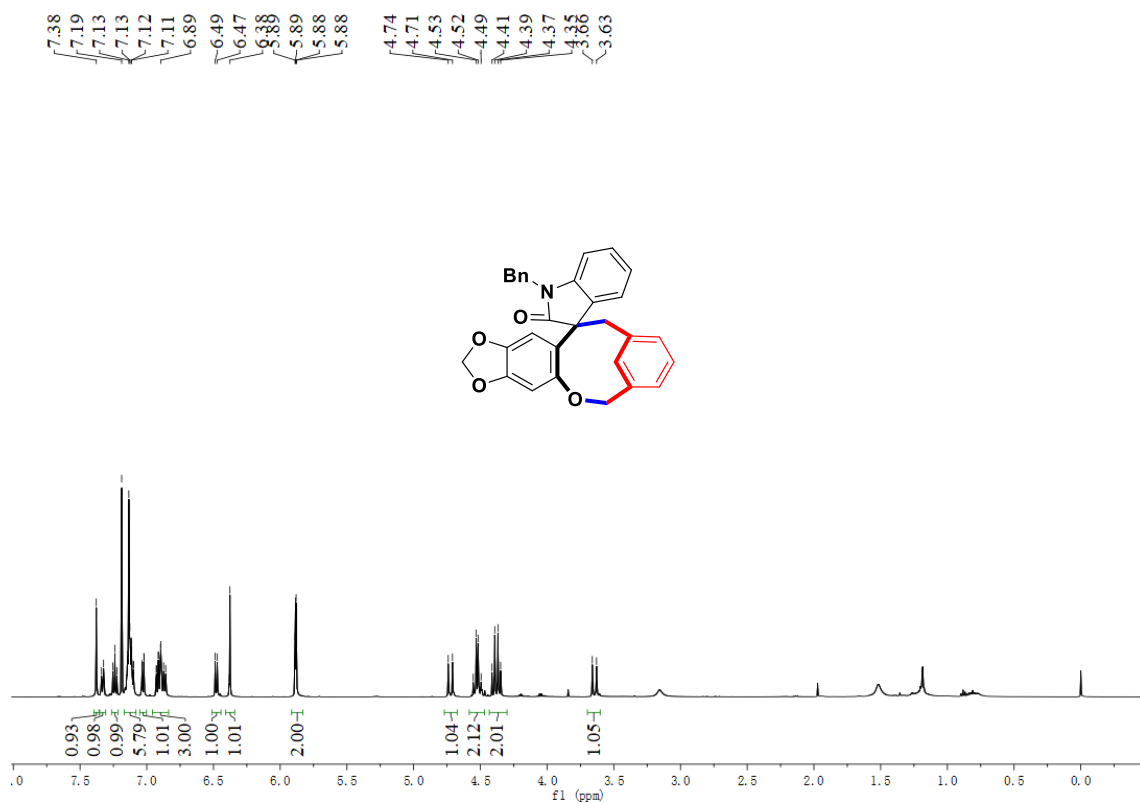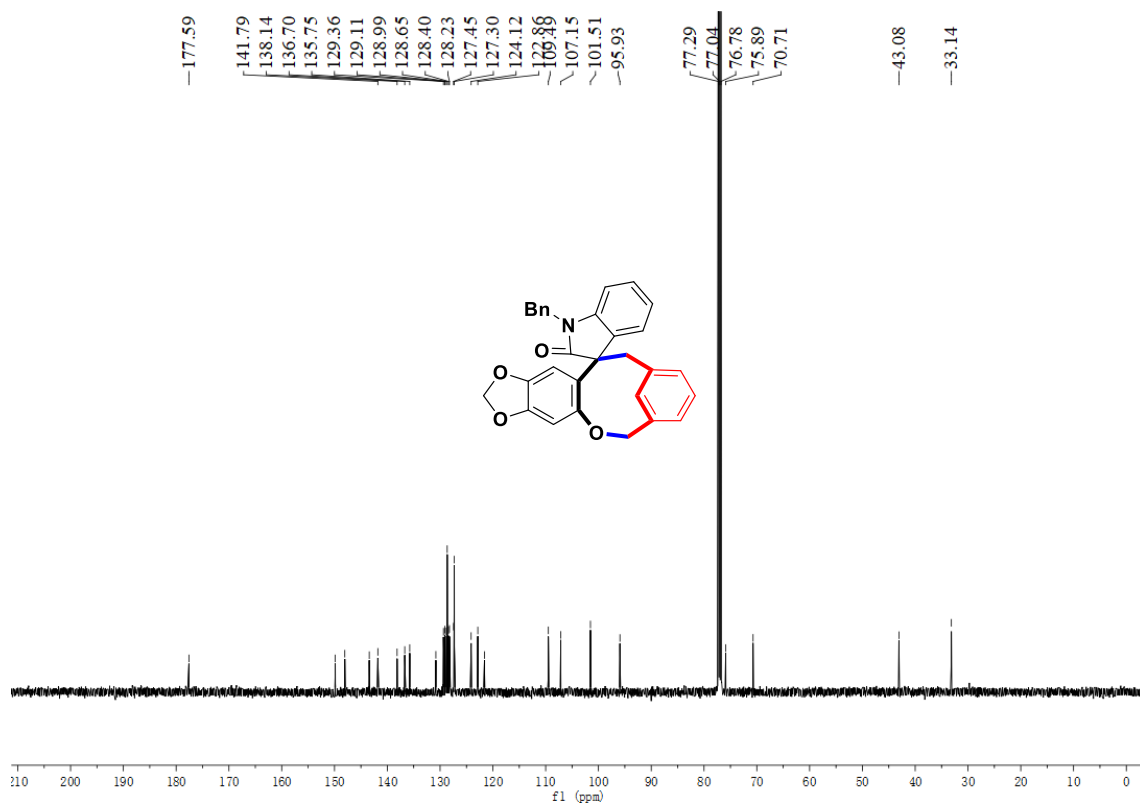

**1-benzyl-3-(2-(bromomethyl)benzyl)-3-(6-hydroxybenzo[d][1,3]dioxol-5-yl)indolin-2-one (12a)**

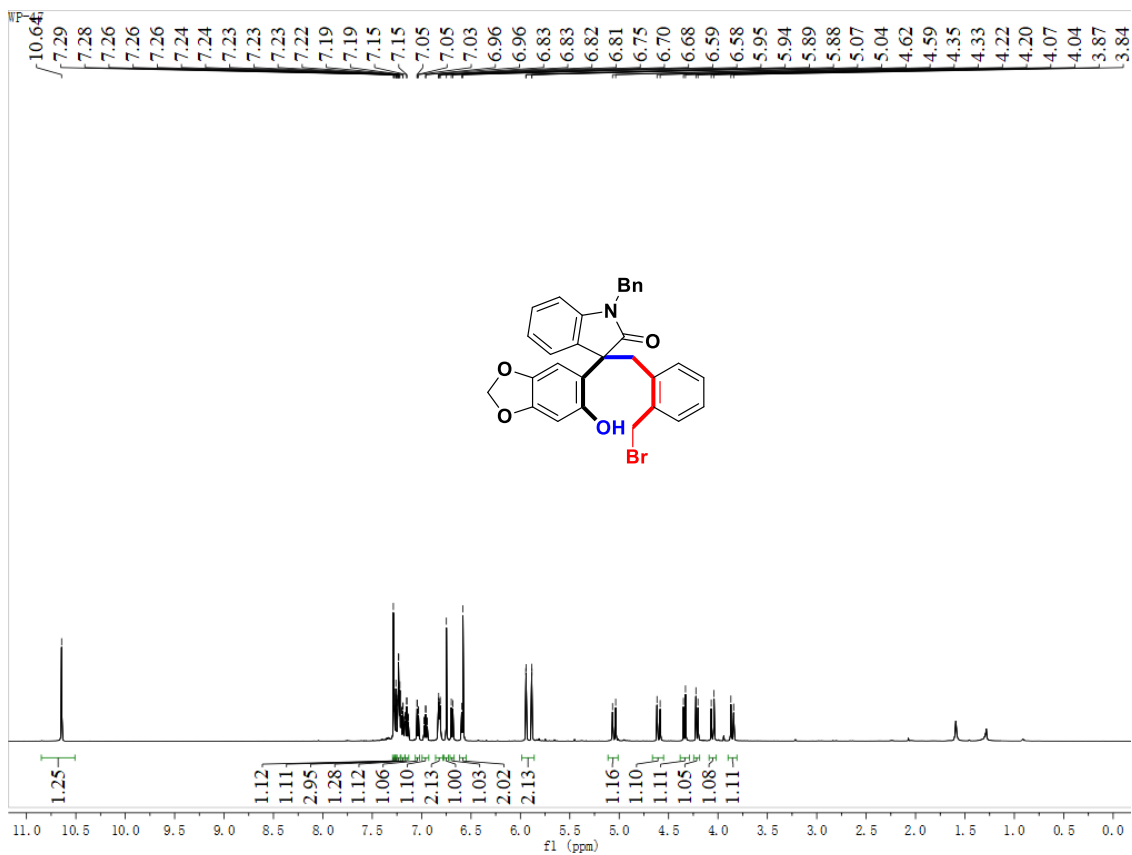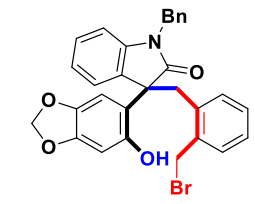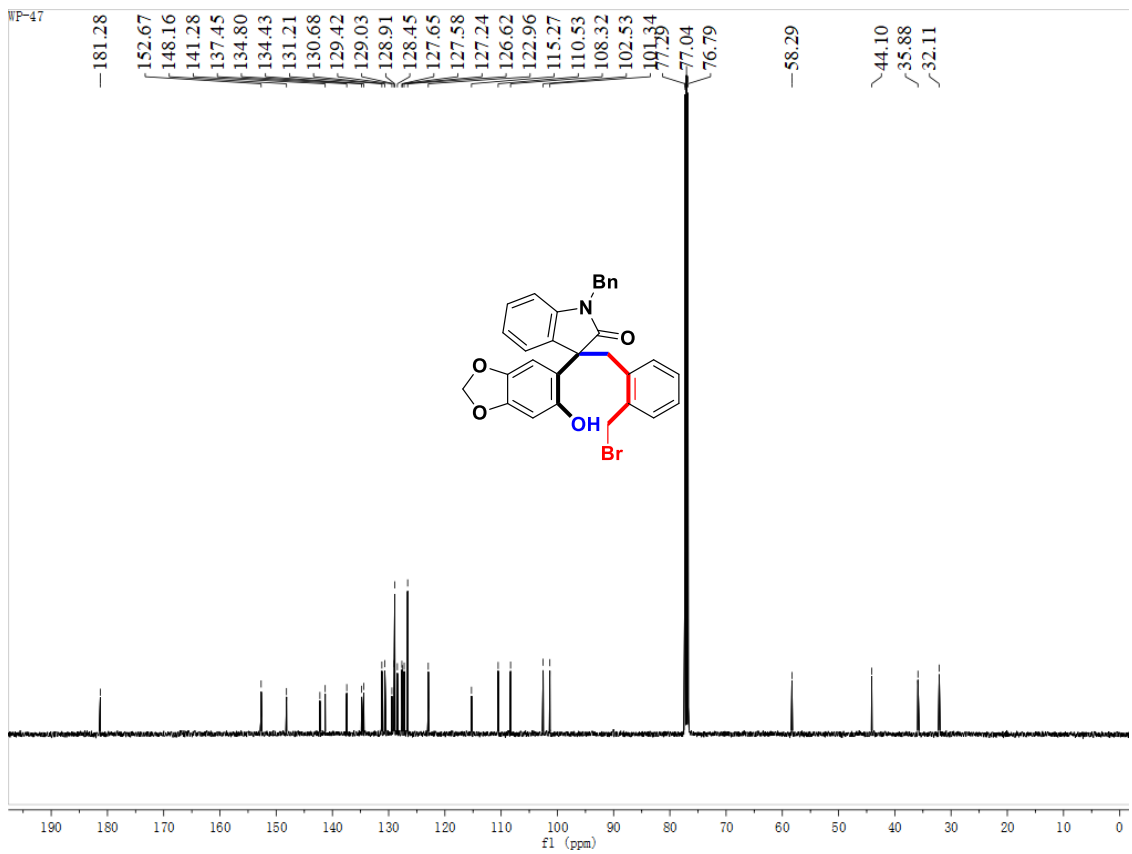

Supplement: d2qo01273a1.pdf [file d2qo01273a1.pdf]
